# Supplementary material for: Function and structure of GFP-like proteins in the protein data bank
Source: Royal Society of Chemistry journal article supplement (doi:10.1039/c1mb05012e), 2011-02-07
Supplement: c1mb05012e.pdf [file c1mb05012e.pdf]

Supplementary Material (ESI) for Molecular BioSystems  
This journal is (c) The Royal Society of Chemistry, 2011

CLUSTAL 2.0.12 multiple sequence alignment

```
3EKJ_A|PDBID|CHAIN|SEQUENCE      MRGSHHHHHHGMASMTGQQMGRDLYDDDDKDLATMVDSSRRKWNKTGHA 50
3EVP_A|PDBID|CHAIN|SEQUENCE      -----
3EKH_A|PDBID|CHAIN|SEQUENCE      MRGSHHHHHHGMASMTGQQMGRDLYDDDDKDLATMVDSSRRKWNKTGHA 50
3EVR_A|PDBID|CHAIN|SEQUENCE      -----DSSRRKWNKTGHA 13
3EK7_A|PDBID|CHAIN|SEQUENCE      MRGSHHHHHHGMASMTGQQMGRDLYDDDDKDLATMVDSSRRKWNKTGHA 50
3EVL_A|PDBID|CHAIN|SEQUENCE      MRGSHHHHHHGMASMTGQQMGRDLYDDDDKDLATMVDSSRRKWNKTGHA 50
3EVV_A|PDBID|CHAIN|SEQUENCE      MRGSHHHHHHGMASMTGQQMGRDLYDDDDKDLATMVDSSRRKWNKTGHA 50
3EK4_A|PDBID|CHAIN|SEQUENCE      MRGSHHHHHHGMASMTGQQMGRDLYDDDDKDLATMVDSSRRKWNKTGHA 50
3EK8_A|PDBID|CHAIN|SEQUENCE      MRGSHHHHHHGMASMTGQQMGRDLYDDDDKDLATMVDSSRRKWNKTGHA 50
2G3D_A|PDBID|CHAIN|SEQUENCE      -----
2G2S_A|PDBID|CHAIN|SEQUENCE      -----
1QYQ_A|PDBID|CHAIN|SEQUENCE      -----
2G6E_A|PDBID|CHAIN|SEQUENCE      -----
1YHH_A|PDBID|CHAIN|SEQUENCE      -----
1YHG_B|PDBID|CHAIN|SEQUENCE      -----
2G5Z_A|PDBID|CHAIN|SEQUENCE      -----
2G16_A|PDBID|CHAIN|SEQUENCE      -----
2HG0_A|PDBID|CHAIN|SEQUENCE      -----
2HGY_A|PDBID|CHAIN|SEQUENCE      -----
1YJF_A|PDBID|CHAIN|SEQUENCE      -----
1YHI_A|PDBID|CHAIN|SEQUENCE      -----
1YJ2_A|PDBID|CHAIN|SEQUENCE      -----
1QYF_A|PDBID|CHAIN|SEQUENCE      -----
1QXT_A|PDBID|CHAIN|SEQUENCE      -----
2A1M_A|PDBID|CHAIN|SEQUENCE      -----
2A1K_A|PDBID|CHAIN|SEQUENCE      -----
2A1J_A|PDBID|CHAIN|SEQUENCE      -----
2A1L_A|PDBID|CHAIN|SEQUENCE      -----
2HFC_A|PDBID|CHAIN|SEQUENCE      -----
2HCG_A|PDBID|CHAIN|SEQUENCE      -----
2Q20_A|PDBID|CHAIN|SEQUENCE      -----
2FZU_A|PDBID|CHAIN|SEQUENCE      -----
1KYR_A|PDBID|CHAIN|SEQUENCE      -----
1KYP_A|PDBID|CHAIN|SEQUENCE      -----
1KYS_A|PDBID|CHAIN|SEQUENCE      -----
2FWQ_A|PDBID|CHAIN|SEQUENCE      -----
1B9C_D|PDBID|CHAIN|SEQUENCE      -----
1MYW_A|PDBID|CHAIN|SEQUENCE      -----
3E08_A|PDBID|CHAIN|SEQUENCE      -----
1QY0_A|PDBID|CHAIN|SEQUENCE      -----
2Q11_A|PDBID|CHAIN|SEQUENCE      -----
1QY3_A|PDBID|CHAIN|SEQUENCE      -----
2QT2_A|PDBID|CHAIN|SEQUENCE      -----
2QRF_A|PDBID|CHAIN|SEQUENCE      -----
2HRS_A|PDBID|CHAIN|SEQUENCE      -----
2B3Q_D|PDBID|CHAIN|SEQUENCE      -----
2B3P_A|PDBID|CHAIN|SEQUENCE      -----
1KPS_A|PDBID|CHAIN|SEQUENCE      -----
3G11_A|PDBID|CHAIN|SEQUENCE      -----
3G12_A|PDBID|CHAIN|SEQUENCE      -----
3G9A_A|PDBID|CHAIN|SEQUENCE      -----
3K1K_B|PDBID|CHAIN|SEQUENCE      -----
1J00_A|PDBID|CHAIN|SEQUENCE      -----
1J11_A|PDBID|CHAIN|SEQUENCE      -----
2A8B_B|PDBID|CHAIN|SEQUENCE      -----
2A8A_A|PDBID|CHAIN|SEQUENCE      -----
3CD1_A|PDBID|CHAIN|SEQUENCE      -----
3CD9_A|PDBID|CHAIN|SEQUENCE      -----
3CB9_A|PDBID|CHAIN|SEQUENCE      -----
3CBE_A|PDBID|CHAIN|SEQUENCE      -----
20KW_F|PDBID|CHAIN|SEQUENCE      -----
20KY_B|PDBID|CHAIN|SEQUENCE      -----
2HQZ_A|PDBID|CHAIN|SEQUENCE      -----
2HJQ_A|PDBID|CHAIN|SEQUENCE      -----
2O2B_A|PDBID|CHAIN|SEQUENCE      -----
2H9W_A|PDBID|CHAIN|SEQUENCE      -----
2O24_A|PDBID|CHAIN|SEQUENCE      -----
2O29_A|PDBID|CHAIN|SEQUENCE      -----
2H6V_A|PDBID|CHAIN|SEQUENCE      -----
1RM0_A|PDBID|CHAIN|SEQUENCE      -----
1RM1_A|PDBID|CHAIN|SEQUENCE      -----
1RMP_A|PDBID|CHAIN|SEQUENCE      -----
1RRX_A|PDBID|CHAIN|SEQUENCE      -----
2Q6P_A|PDBID|CHAIN|SEQUENCE      -----
1Z1Q_A|PDBID|CHAIN|SEQUENCE      -----
1S6Z_A|PDBID|CHAIN|SEQUENCE      -----
1Z1P_A|PDBID|CHAIN|SEQUENCE      -----
1F06_A|PDBID|CHAIN|SEQUENCE      -----
1F09_A|PDBID|CHAIN|SEQUENCE      -----
2YFF_A|PDBID|CHAIN|SEQUENCE      -----
3D08_A|PDBID|CHAIN|SEQUENCE      -----
3D01_A|PDBID|CHAIN|SEQUENCE      -----
3D09_A|PDBID|CHAIN|SEQUENCE      -----
3D0A_A|PDBID|CHAIN|SEQUENCE      -----
3D0C_A|PDBID|CHAIN|SEQUENCE      -----
3D0D_A|PDBID|CHAIN|SEQUENCE      -----
3D0E_A|PDBID|CHAIN|SEQUENCE      -----
3D0F_A|PDBID|CHAIN|SEQUENCE      -----
3D0H_A|PDBID|CHAIN|SEQUENCE      -----
3D0I_A|PDBID|CHAIN|SEQUENCE      -----
3D0J_A|PDBID|CHAIN|SEQUENCE      -----
3D0K_A|PDBID|CHAIN|SEQUENCE      -----
3D0L_A|PDBID|CHAIN|SEQUENCE      -----
3D0M_A|PDBID|CHAIN|SEQUENCE      -----
3D0N_A|PDBID|CHAIN|SEQUENCE      -----
3D0O_A|PDBID|CHAIN|SEQUENCE      -----
3D0Q_A|PDBID|CHAIN|SEQUENCE      -----
3D0R_A|PDBID|CHAIN|SEQUENCE      -----
3D0S_A|PDBID|CHAIN|SEQUENCE      -----
3D06_A|PDBID|CHAIN|SEQUENCE      -----
3D07_A|PDBID|CHAIN|SEQUENCE      -----
3DPW_A|PDBID|CHAIN|SEQUENCE      -----
```

3DPX\_A | PDBID | CHAIN | SEQUENCE -----  
3DPZ\_A | PDBID | CHAIN | SEQUENCE -----  
3DQ2\_A | PDBID | CHAIN | SEQUENCE -----  
3DQ3\_A | PDBID | CHAIN | SEQUENCE -----  
1HUJ\_A | PDBID | CHAIN | SEQUENCE -----  
1YFP\_A | PDBID | CHAIN | SEQUENCE -----  
2JAD\_A | PDBID | CHAIN | SEQUENCE -----  
1H6R\_A | PDBID | CHAIN | SEQUENCE -----  
1C4F\_A | PDBID | CHAIN | SEQUENCE -----  
1EMB\_A | PDBID | CHAIN | SEQUENCE -----  
1Q4A\_A | PDBID | CHAIN | SEQUENCE -----  
1EMA\_A | PDBID | CHAIN | SEQUENCE -----  
1Q4B\_A | PDBID | CHAIN | SEQUENCE -----  
1EMG\_A | PDBID | CHAIN | SEQUENCE -----  
2DUF\_A | PDBID | CHAIN | SEQUENCE -----  
2DUJ\_A | PDBID | CHAIN | SEQUENCE -----  
2DUI\_A | PDBID | CHAIN | SEQUENCE -----  
2DUG\_A | PDBID | CHAIN | SEQUENCE -----  
2DUH\_A | PDBID | CHAIN | SEQUENCE -----  
1Q4E\_A | PDBID | CHAIN | SEQUENCE -----  
1Q73\_A | PDBID | CHAIN | SEQUENCE -----  
1Q4D\_A | PDBID | CHAIN | SEQUENCE -----  
1Q4C\_A | PDBID | CHAIN | SEQUENCE -----  
1JBZ\_A | PDBID | CHAIN | SEQUENCE -----  
1JBY\_A | PDBID | CHAIN | SEQUENCE -----  
1W75\_D | PDBID | CHAIN | SEQUENCE -----  
1W7U\_D | PDBID | CHAIN | SEQUENCE -----  
1W7T\_D | PDBID | CHAIN | SEQUENCE -----  
1HCJ\_A | PDBID | CHAIN | SEQUENCE -----  
2QLE\_A | PDBID | CHAIN | SEQUENCE -----  
1BFF\_A | PDBID | CHAIN | SEQUENCE -----  
2EMO\_A | PDBID | CHAIN | SEQUENCE -----  
1EMF\_A | PDBID | CHAIN | SEQUENCE -----  
2EMD\_A | PDBID | CHAIN | SEQUENCE -----  
2EMN\_A | PDBID | CHAIN | SEQUENCE -----  
1EMM\_A | PDBID | CHAIN | SEQUENCE -----  
1EMC\_A | PDBID | CHAIN | SEQUENCE -----  
1EML\_A | PDBID | CHAIN | SEQUENCE -----  
1EME\_A | PDBID | CHAIN | SEQUENCE -----  
1EMK\_A | PDBID | CHAIN | SEQUENCE -----  
2WUR\_A | PDBID | CHAIN | SEQUENCE -----  
1GFL\_A | PDBID | CHAIN | SEQUENCE -----  
1RM9\_A | PDBID | CHAIN | SEQUENCE -----  
2WSN\_A | PDBID | CHAIN | SEQUENCE -----  
2Q57\_A | PDBID | CHAIN | SEQUENCE -----  
2WSO\_A | PDBID | CHAIN | SEQUENCE -----  
1OXF\_A | PDBID | CHAIN | SEQUENCE -----  
1CV7\_A | PDBID | CHAIN | SEQUENCE -----  
3GEX\_A | PDBID | CHAIN | SEQUENCE -----  
1OXD\_A | PDBID | CHAIN | SEQUENCE -----  
1OXE\_A | PDBID | CHAIN | SEQUENCE -----  
3LVC\_A | PDBID | CHAIN | SEQUENCE -----  
3LVD\_A | PDBID | CHAIN | SEQUENCE -----  
3LVA\_A | PDBID | CHAIN | SEQUENCE -----  
2HPW\_A | PDBID | CHAIN | SEQUENCE -----  
2WIQ\_A | PDBID | CHAIN | SEQUENCE -----  
3A8S\_A | PDBID | CHAIN | SEQUENCE -----  
2WIS\_A | PDBID | CHAIN | SEQUENCE -----  
3GB3\_A | PDBID | CHAIN | SEQUENCE -----  
3GL4\_A | PDBID | CHAIN | SEQUENCE -----  
2A46\_A | PDBID | CHAIN | SEQUENCE -----  
2A48\_A | PDBID | CHAIN | SEQUENCE -----  
2A47\_A | PDBID | CHAIN | SEQUENCE -----  
2ZMW\_A | PDBID | CHAIN | SEQUENCE -----  
2ZMJ\_A | PDBID | CHAIN | SEQUENCE -----  
2ZOG\_A | PDBID | CHAIN | SEQUENCE -----  
2ZOT\_A | PDBID | CHAIN | SEQUENCE -----  
3BX9\_B | PDBID | CHAIN | SEQUENCE -----  
3BXA\_A | PDBID | CHAIN | SEQUENCE -----  
3BXC\_A | PDBID | CHAIN | SEQUENCE -----  
3BXC\_A | PDBID | CHAIN | SEQUENCE -----  
3H10\_A | PDBID | CHAIN | SEQUENCE -----  
3H1R\_A | PDBID | CHAIN | SEQUENCE -----  
3M22\_A | PDBID | CHAIN | SEQUENCE -----  
3M24\_A | PDBID | CHAIN | SEQUENCE -----  
3IP2\_A | PDBID | CHAIN | SEQUENCE -----  
3EST\_A | PDBID | CHAIN | SEQUENCE -----  
3E5V\_A | PDBID | CHAIN | SEQUENCE -----  
1UIS\_B | PDBID | CHAIN | SEQUENCE -----  
3E5W\_A | PDBID | CHAIN | SEQUENCE -----  
2A50\_A | PDBID | CHAIN | SEQUENCE -----  
2A52\_A | PDBID | CHAIN | SEQUENCE -----  
1XM2\_A | PDBID | CHAIN | SEQUENCE -----  
2A54\_C | PDBID | CHAIN | SEQUENCE -----  
2A53\_A | PDBID | CHAIN | SEQUENCE -----  
2A56\_A | PDBID | CHAIN | SEQUENCE -----  
1XQM\_A | PDBID | CHAIN | SEQUENCE -----  
3CFF\_L | PDBID | CHAIN | SEQUENCE -----  
3CFH\_S | PDBID | CHAIN | SEQUENCE -----  
3CFA\_L | PDBID | CHAIN | SEQUENCE -----  
1YZW\_A | PDBID | CHAIN | SEQUENCE -----  
2IB5\_A | PDBID | CHAIN | SEQUENCE -----  
2IB6\_A | PDBID | CHAIN | SEQUENCE -----  
2C9T\_A | PDBID | CHAIN | SEQUENCE -----  
1G7K\_A | PDBID | CHAIN | SEQUENCE -----  
1ZGO\_A | PDBID | CHAIN | SEQUENCE -----  
1GGX\_A | PDBID | CHAIN | SEQUENCE -----  
1ZGQ\_H | PDBID | CHAIN | SEQUENCE -----  
1ZGP\_A | PDBID | CHAIN | SEQUENCE -----  
2H8Q\_A | PDBID | CHAIN | SEQUENCE -----  
2VAE\_A | PDBID | CHAIN | SEQUENCE -----  
2V4E\_A | PDBID | CHAIN | SEQUENCE -----  
2VAD\_A | PDBID | CHAIN | SEQUENCE -----  
2H5P\_A | PDBID | CHAIN | SEQUENCE -----  
2H5R\_A | PDBID | CHAIN | SEQUENCE -----



2HRS\_A | PDBID | CHAIN | SEQUENCE -----  
2B3Q\_D | PDBID | CHAIN | SEQUENCE -----  
2B3P\_A | PDBID | CHAIN | SEQUENCE -----  
1KP5\_A | PDBID | CHAIN | SEQUENCE -----  
3GJ1\_A | PDBID | CHAIN | SEQUENCE -----  
3GJ2\_A | PDBID | CHAIN | SEQUENCE -----  
3G9A\_A | PDBID | CHAIN | SEQUENCE -----  
3K1K\_B | PDBID | CHAIN | SEQUENCE -----  
1JCO\_A | PDBID | CHAIN | SEQUENCE -----  
1JCL\_A | PDBID | CHAIN | SEQUENCE -----  
2A8B\_B | PDBID | CHAIN | SEQUENCE -----  
2AHA\_A | PDBID | CHAIN | SEQUENCE -----  
3CD1\_A | PDBID | CHAIN | SEQUENCE -----  
3CD9\_A | PDBID | CHAIN | SEQUENCE -----  
3CB9\_A | PDBID | CHAIN | SEQUENCE -----  
3CBE\_A | PDBID | CHAIN | SEQUENCE -----  
2OKW\_F | PDBID | CHAIN | SEQUENCE -----  
2OKY\_B | PDBID | CHAIN | SEQUENCE -----  
2HQZ\_A | PDBID | CHAIN | SEQUENCE -----  
2HJO\_A | PDBID | CHAIN | SEQUENCE -----  
2Q2B\_A | PDBID | CHAIN | SEQUENCE -----  
2H9W\_A | PDBID | CHAIN | SEQUENCE -----  
2O24\_A | PDBID | CHAIN | SEQUENCE -----  
2O29\_A | PDBID | CHAIN | SEQUENCE -----  
2H6V\_A | PDBID | CHAIN | SEQUENCE -----  
1RMQ\_A | PDBID | CHAIN | SEQUENCE -----  
1RMM\_A | PDBID | CHAIN | SEQUENCE -----  
1RMP\_A | PDBID | CHAIN | SEQUENCE -----  
1RRX\_A | PDBID | CHAIN | SEQUENCE -----  
2Q6P\_A | PDBID | CHAIN | SEQUENCE -----  
1Z1Q\_A | PDBID | CHAIN | SEQUENCE -----  
156Z\_A | PDBID | CHAIN | SEQUENCE -----  
1Z1P\_A | PDBID | CHAIN | SEQUENCE -----  
1F0B\_A | PDBID | CHAIN | SEQUENCE -----  
1F09\_A | PDBID | CHAIN | SEQUENCE -----  
2YFP\_A | PDBID | CHAIN | SEQUENCE -----  
3DQ8\_A | PDBID | CHAIN | SEQUENCE -----  
3DQ1\_A | PDBID | CHAIN | SEQUENCE -----  
3DQ9\_A | PDBID | CHAIN | SEQUENCE -----  
3DQA\_A | PDBID | CHAIN | SEQUENCE -----  
3DQC\_A | PDBID | CHAIN | SEQUENCE -----  
3DQD\_A | PDBID | CHAIN | SEQUENCE -----  
3DQE\_A | PDBID | CHAIN | SEQUENCE -----  
3DQF\_A | PDBID | CHAIN | SEQUENCE -----  
3DQH\_A | PDBID | CHAIN | SEQUENCE -----  
3DQI\_A | PDBID | CHAIN | SEQUENCE -----  
3DQJ\_A | PDBID | CHAIN | SEQUENCE -----  
3DQK\_A | PDBID | CHAIN | SEQUENCE -----  
3DQL\_A | PDBID | CHAIN | SEQUENCE -----  
3DQM\_A | PDBID | CHAIN | SEQUENCE -----  
3DQN\_A | PDBID | CHAIN | SEQUENCE -----  
3DQO\_A | PDBID | CHAIN | SEQUENCE -----  
3DQU\_A | PDBID | CHAIN | SEQUENCE -----  
3DQA\_A | PDBID | CHAIN | SEQUENCE -----  
3DQ5\_A | PDBID | CHAIN | SEQUENCE -----  
3DQ6\_A | PDBID | CHAIN | SEQUENCE -----  
3DQ7\_A | PDBID | CHAIN | SEQUENCE -----  
3DPW\_A | PDBID | CHAIN | SEQUENCE -----  
3DPX\_A | PDBID | CHAIN | SEQUENCE -----  
3DPZ\_A | PDBID | CHAIN | SEQUENCE -----  
3DQ2\_A | PDBID | CHAIN | SEQUENCE -----  
3DQ3\_A | PDBID | CHAIN | SEQUENCE -----  
1HUY\_A | PDBID | CHAIN | SEQUENCE -----  
1YFP\_A | PDBID | CHAIN | SEQUENCE -----  
2JAD\_A | PDBID | CHAIN | SEQUENCE -----  
1H6R\_A | PDBID | CHAIN | SEQUENCE -----  
1C4F\_A | PDBID | CHAIN | SEQUENCE -----  
1EMB\_A | PDBID | CHAIN | SEQUENCE -----  
1Q4A\_A | PDBID | CHAIN | SEQUENCE -----  
1EMA\_A | PDBID | CHAIN | SEQUENCE -----  
1Q4B\_A | PDBID | CHAIN | SEQUENCE -----  
1EMG\_A | PDBID | CHAIN | SEQUENCE -----  
2DUF\_A | PDBID | CHAIN | SEQUENCE -----  
2DUJ\_A | PDBID | CHAIN | SEQUENCE -----  
2DUT\_A | PDBID | CHAIN | SEQUENCE -----  
2DUG\_A | PDBID | CHAIN | SEQUENCE -----  
2DUH\_A | PDBID | CHAIN | SEQUENCE -----  
1Q4E\_A | PDBID | CHAIN | SEQUENCE -----  
1Q73\_A | PDBID | CHAIN | SEQUENCE -----  
1Q4D\_A | PDBID | CHAIN | SEQUENCE -----  
1Q4C\_A | PDBID | CHAIN | SEQUENCE -----  
1J8Z\_A | PDBID | CHAIN | SEQUENCE -----  
1J8Y\_A | PDBID | CHAIN | SEQUENCE -----  
1W75\_D | PDBID | CHAIN | SEQUENCE -----  
1W7U\_D | PDBID | CHAIN | SEQUENCE -----  
1W7T\_D | PDBID | CHAIN | SEQUENCE -----  
1HCJ\_A | PDBID | CHAIN | SEQUENCE -----  
2QLE\_A | PDBID | CHAIN | SEQUENCE -----  
1BFP\_A | PDBID | CHAIN | SEQUENCE -----  
2EMO\_A | PDBID | CHAIN | SEQUENCE -----  
1EMF\_A | PDBID | CHAIN | SEQUENCE -----  
2EMD\_A | PDBID | CHAIN | SEQUENCE -----  
2EMN\_A | PDBID | CHAIN | SEQUENCE -----  
1EMM\_A | PDBID | CHAIN | SEQUENCE -----  
1EMC\_A | PDBID | CHAIN | SEQUENCE -----  
1EML\_A | PDBID | CHAIN | SEQUENCE -----  
1EME\_A | PDBID | CHAIN | SEQUENCE -----  
1EMK\_A | PDBID | CHAIN | SEQUENCE -----  
2WUR\_A | PDBID | CHAIN | SEQUENCE -----  
1GFL\_A | PDBID | CHAIN | SEQUENCE -----  
1RM9\_A | PDBID | CHAIN | SEQUENCE -----  
2WSN\_A | PDBID | CHAIN | SEQUENCE -----  
2Q57\_A | PDBID | CHAIN | SEQUENCE -----  
2WSO\_A | PDBID | CHAIN | SEQUENCE -----  
1OXF\_A | PDBID | CHAIN | SEQUENCE -----





3DQK\_A | PDBID | CHAIN | SEQUENCE -----  
3DQL\_A | PDBID | CHAIN | SEQUENCE -----  
3DQM\_A | PDBID | CHAIN | SEQUENCE -----  
3DQN\_A | PDBID | CHAIN | SEQUENCE -----  
3DQQ\_A | PDBID | CHAIN | SEQUENCE -----  
3DQU\_A | PDBID | CHAIN | SEQUENCE -----  
3DQ4\_A | PDBID | CHAIN | SEQUENCE -----  
3DQ5\_A | PDBID | CHAIN | SEQUENCE -----  
3DQ6\_A | PDBID | CHAIN | SEQUENCE -----  
3DQ7\_A | PDBID | CHAIN | SEQUENCE -----  
3DPW\_A | PDBID | CHAIN | SEQUENCE -----  
3DPX\_A | PDBID | CHAIN | SEQUENCE -----  
3DPZ\_A | PDBID | CHAIN | SEQUENCE -----  
3DQ2\_A | PDBID | CHAIN | SEQUENCE -----  
3DQ3\_A | PDBID | CHAIN | SEQUENCE -----  
1HUY\_A | PDBID | CHAIN | SEQUENCE -----  
1YFP\_A | PDBID | CHAIN | SEQUENCE -----  
2JAD\_A | PDBID | CHAIN | SEQUENCE -----  
1H6R\_A | PDBID | CHAIN | SEQUENCE -----  
1C4F\_A | PDBID | CHAIN | SEQUENCE -----  
1EM8\_A | PDBID | CHAIN | SEQUENCE -----  
1Q4A\_A | PDBID | CHAIN | SEQUENCE -----  
1EMA\_A | PDBID | CHAIN | SEQUENCE -----  
1Q4B\_A | PDBID | CHAIN | SEQUENCE -----  
1EMG\_A | PDBID | CHAIN | SEQUENCE -----  
2DUF\_A | PDBID | CHAIN | SEQUENCE -----  
2DUJ\_A | PDBID | CHAIN | SEQUENCE -----  
2DUT\_A | PDBID | CHAIN | SEQUENCE -----  
2DUG\_A | PDBID | CHAIN | SEQUENCE -----  
2DUH\_A | PDBID | CHAIN | SEQUENCE -----  
1Q4E\_A | PDBID | CHAIN | SEQUENCE -----  
1Q73\_A | PDBID | CHAIN | SEQUENCE -----  
1Q4D\_A | PDBID | CHAIN | SEQUENCE -----  
1Q4C\_A | PDBID | CHAIN | SEQUENCE -----  
1J8Z\_A | PDBID | CHAIN | SEQUENCE -----  
1J8Y\_A | PDBID | CHAIN | SEQUENCE -----  
1W75\_D | PDBID | CHAIN | SEQUENCE -----  
1W7U\_D | PDBID | CHAIN | SEQUENCE -----  
1W7T\_D | PDBID | CHAIN | SEQUENCE -----  
1HCJ\_A | PDBID | CHAIN | SEQUENCE -----  
2QLE\_A | PDBID | CHAIN | SEQUENCE -----  
1BFP\_A | PDBID | CHAIN | SEQUENCE -----  
2EMO\_A | PDBID | CHAIN | SEQUENCE -----  
1EMF\_A | PDBID | CHAIN | SEQUENCE -----  
2EMD\_A | PDBID | CHAIN | SEQUENCE -----  
2EMN\_A | PDBID | CHAIN | SEQUENCE -----  
1EMM\_A | PDBID | CHAIN | SEQUENCE -----  
1EMC\_A | PDBID | CHAIN | SEQUENCE -----  
1EML\_A | PDBID | CHAIN | SEQUENCE -----  
1EME\_A | PDBID | CHAIN | SEQUENCE -----  
1EMK\_A | PDBID | CHAIN | SEQUENCE -----  
2WUR\_A | PDBID | CHAIN | SEQUENCE -----  
1GFL\_A | PDBID | CHAIN | SEQUENCE -----  
1RM9\_A | PDBID | CHAIN | SEQUENCE -----  
2WSN\_A | PDBID | CHAIN | SEQUENCE -----  
2Q57\_A | PDBID | CHAIN | SEQUENCE -----  
2WSO\_A | PDBID | CHAIN | SEQUENCE -----  
10XF\_A | PDBID | CHAIN | SEQUENCE -----  
1CV7\_A | PDBID | CHAIN | SEQUENCE -----  
3GEX\_A | PDBID | CHAIN | SEQUENCE -----  
10XD\_A | PDBID | CHAIN | SEQUENCE -----  
10XE\_A | PDBID | CHAIN | SEQUENCE -----  
3LVC\_A | PDBID | CHAIN | SEQUENCE -----  
3LVD\_A | PDBID | CHAIN | SEQUENCE -----  
3LVA\_A | PDBID | CHAIN | SEQUENCE -----  
2HPW\_A | PDBID | CHAIN | SEQUENCE -----  
2WIQ\_A | PDBID | CHAIN | SEQUENCE -----  
3A85\_A | PDBID | CHAIN | SEQUENCE -----  
2WIS\_A | PDBID | CHAIN | SEQUENCE -----  
3GB3\_A | PDBID | CHAIN | SEQUENCE -----  
3GL4\_A | PDBID | CHAIN | SEQUENCE -----  
2A46\_A | PDBID | CHAIN | SEQUENCE -----  
2A48\_A | PDBID | CHAIN | SEQUENCE -----  
2A47\_A | PDBID | CHAIN | SEQUENCE -----  
2ZMW\_A | PDBID | CHAIN | SEQUENCE -----  
2ZMU\_A | PDBID | CHAIN | SEQUENCE -----  
2Z06\_A | PDBID | CHAIN | SEQUENCE -----  
2Z07\_A | PDBID | CHAIN | SEQUENCE -----  
3BX9\_B | PDBID | CHAIN | SEQUENCE -----  
3BXA\_A | PDBID | CHAIN | SEQUENCE -----  
3BXB\_A | PDBID | CHAIN | SEQUENCE -----  
3BXC\_A | PDBID | CHAIN | SEQUENCE -----  
3H10\_A | PDBID | CHAIN | SEQUENCE -----  
3H1R\_A | PDBID | CHAIN | SEQUENCE -----  
3M22\_A | PDBID | CHAIN | SEQUENCE -----  
3M24\_A | PDBID | CHAIN | SEQUENCE -----  
3IP2\_A | PDBID | CHAIN | SEQUENCE -----  
3E5T\_A | PDBID | CHAIN | SEQUENCE -----  
3E5V\_A | PDBID | CHAIN | SEQUENCE -----  
1UI5\_B | PDBID | CHAIN | SEQUENCE -----  
3E5W\_A | PDBID | CHAIN | SEQUENCE -----  
2A50\_A | PDBID | CHAIN | SEQUENCE -----  
2A52\_A | PDBID | CHAIN | SEQUENCE -----  
1XMZ\_A | PDBID | CHAIN | SEQUENCE -----  
2A54\_C | PDBID | CHAIN | SEQUENCE -----  
2A53\_A | PDBID | CHAIN | SEQUENCE -----  
2A56\_A | PDBID | CHAIN | SEQUENCE -----  
1XQM\_A | PDBID | CHAIN | SEQUENCE -----  
3CFE\_L | PDBID | CHAIN | SEQUENCE -----  
3CFH\_S | PDBID | CHAIN | SEQUENCE -----  
3CFA\_L | PDBID | CHAIN | SEQUENCE -----  
1YZW\_A | PDBID | CHAIN | SEQUENCE -----  
2IB5\_A | PDBID | CHAIN | SEQUENCE -----  
2IB6\_A | PDBID | CHAIN | SEQUENCE -----  
2C9L\_A | PDBID | CHAIN | SEQUENCE -----

-----MRGSHHHHHH 10

-----MGSSHHHHHSSGL 14

-----MGSSHHHHHSSGL 14

-----MRGSHHHHHHG 11

-----MRGSHHHHHHG 11

-----MRGSHHHHHHG 11

-----MRGSHHHHHHGASMTGGQ 19

-----M 1

-----M 1

-----M 1

-----M 1

-----M 1

-----M 2

-----M 2

-----M 2

-----M 2

1G7K\_A | PDBID | CHAIN | SEQUENCE -----MRG 3  
1ZGO\_A | PDBID | CHAIN | SEQUENCE -----  
1GGX\_A | PDBID | CHAIN | SEQUENCE -----  
1ZGQ\_H | PDBID | CHAIN | SEQUENCE -----  
1ZGP\_A | PDBID | CHAIN | SEQUENCE -----  
2H8Q\_A | PDBID | CHAIN | SEQUENCE -----  
2VAE\_A | PDBID | CHAIN | SEQUENCE -----  
2V4E\_A | PDBID | CHAIN | SEQUENCE -----  
2VAD\_A | PDBID | CHAIN | SEQUENCE -----  
2H5P\_A | PDBID | CHAIN | SEQUENCE -----  
2H5R\_A | PDBID | CHAIN | SEQUENCE -----  
2H5Q\_A | PDBID | CHAIN | SEQUENCE -----  
2QLG\_A | PDBID | CHAIN | SEQUENCE -----  
2QLT\_A | PDBID | CHAIN | SEQUENCE -----  
2QLH\_A | PDBID | CHAIN | SEQUENCE -----  
2H5Q\_A | PDBID | CHAIN | SEQUENCE -----  
3KCS\_A | PDBID | CHAIN | SEQUENCE -----  
3KCT\_A | PDBID | CHAIN | SEQUENCE -----  
3LF3\_A | PDBID | CHAIN | SEQUENCE -----  
3LF4\_A | PDBID | CHAIN | SEQUENCE -----  
2P4M\_A | PDBID | CHAIN | SEQUENCE -----  
2ARL\_A | PDBID | CHAIN | SEQUENCE -----  
1MOV\_A | PDBID | CHAIN | SEQUENCE -----  
1MOU\_A | PDBID | CHAIN | SEQUENCE -----  
2MHS\_A | PDBID | CHAIN | SEQUENCE -----MGSSHHHHH 9  
2MHT\_A | PDBID | CHAIN | SEQUENCE -----MGSSHHHHH 9  
2MHU\_A | PDBID | CHAIN | SEQUENCE -----MGSSHHHHH 9  
3IR8\_A | PDBID | CHAIN | SEQUENCE -----  
3CGL\_A | PDBID | CHAIN | SEQUENCE -----MRG 3  
2Z6Z\_A | PDBID | CHAIN | SEQUENCE -----MRGSHHHHHHGMSMTGGQQM 21  
2ZOV\_A | PDBID | CHAIN | SEQUENCE -----MRGSHHHHHHGMSMTGGQQM 21  
2POX\_A | PDBID | CHAIN | SEQUENCE -----MRGSHHHHHHGMSMTGGQQM 21  
2IEZ\_A | PDBID | CHAIN | SEQUENCE -----  
2Z1O\_A | PDBID | CHAIN | SEQUENCE -----G----- 1  
2Z6Y\_A | PDBID | CHAIN | SEQUENCE -----G----- 1  
2GXZ\_A | PDBID | CHAIN | SEQUENCE -----MRGSHHHHHHGLVPRG----- 17  
2GX8\_B | PDBID | CHAIN | SEQUENCE -----MRGSHHHHHHGLVPRG----- 17  
2Z6X\_A | PDBID | CHAIN | SEQUENCE -----MRGSHHHHHHGMSMTGGQQM 21  
3LS3\_A | PDBID | CHAIN | SEQUENCE -----MRGSHHHHHH----- 10  
3LSA\_A | PDBID | CHAIN | SEQUENCE -----MRGSHHHHHH----- 10  
2DDC\_A | PDBID | CHAIN | SEQUENCE -----  
2DDO\_A | PDBID | CHAIN | SEQUENCE -----  
1XSS\_A | PDBID | CHAIN | SEQUENCE -----  
2VVI\_A | PDBID | CHAIN | SEQUENCE -----  
2VHI\_A | PDBID | CHAIN | SEQUENCE -----  
2VVJ\_A | PDBID | CHAIN | SEQUENCE -----KGGTGGSMVSKGEEELFTGVVPIVLVLDGDNVGHKFSVSGEGEDATYGL 200  
1ZUX\_A | PDBID | CHAIN | SEQUENCE -----KGGTGGSMVSKGEEELFTGVVPIVLVLDGDNVGHKFSVSGEGEDATYGL 200  
2BTJ\_A | PDBID | CHAIN | SEQUENCE -----KGGTGGSMVSKGEEELFTGVVPIVLVLDGDNVGHKFSVSGEGEDATYGL 200  
2GW3\_A | PDBID | CHAIN | SEQUENCE -----  
2GW4\_A | PDBID | CHAIN | SEQUENCE -----  
2OTE\_A | PDBID | CHAIN | SEQUENCE -----  
2OTB\_A | PDBID | CHAIN | SEQUENCE -----  
2HQK\_A | PDBID | CHAIN | SEQUENCE -----  
2VZX\_A | PDBID | CHAIN | SEQUENCE -----  
3ADF\_A | PDBID | CHAIN | SEQUENCE -----  
2ICR\_A | PDBID | CHAIN | SEQUENCE -----  
2FL1\_A | PDBID | CHAIN | SEQUENCE -----  
2OGR\_A | PDBID | CHAIN | SEQUENCE -----  
1XAE\_A | PDBID | CHAIN | SEQUENCE -----  
1XA9\_A | PDBID | CHAIN | SEQUENCE -----  
2PXS\_A | PDBID | CHAIN | SEQUENCE -----  
2PXW\_A | PDBID | CHAIN | SEQUENCE -----  
2OJK\_A | PDBID | CHAIN | SEQUENCE -----  
2RH7\_A | PDBID | CHAIN | SEQUENCE -----  
2C9J\_H | PDBID | CHAIN | SEQUENCE -----  
2G6X\_A | PDBID | CHAIN | SEQUENCE -----  
2G6Y\_A | PDBID | CHAIN | SEQUENCE -----  
2G3O\_A | PDBID | CHAIN | SEQUENCE -----  
2DD7\_A | PDBID | CHAIN | SEQUENCE -----  
2DD9\_D | PDBID | CHAIN | SEQUENCE -----  
  
3EKJ\_A | PDBID | CHAIN | SEQUENCE KGGTGGSMVSKGEEELFTGVVPIVLVLDGDNVGHKFSVSGEGEDATYGL 200  
3EVR\_A | PDBID | CHAIN | SEQUENCE KGGTGGSMVSKGEEELFTGVVPIVLVLDGDNVGHKFSVSGEGEDATYGL 143  
3EKH\_A | PDBID | CHAIN | SEQUENCE KGGTGGSMVSKGEEELFTGVVPIVLVLDGDNVGHKFSVSGEGEDATYGL 200  
3EVR\_A | PDBID | CHAIN | SEQUENCE KGGTGGSMVSKGEEELFTGVVPIVLVLDGDNVGHKFSVSGEGEDATYGL 163  
3EK7\_A | PDBID | CHAIN | SEQUENCE KGGTGGSMVSKGEEELFTGVVPIVLVLDGDNVGHKFSVSGEGEDATYGL 200  
3EVL\_A | PDBID | CHAIN | SEQUENCE KGGTGGSMVSKGEEELFTGVVPIVLVLDGDNVGHKFSVSGEGEDATYGL 200  
3EYV\_A | PDBID | CHAIN | SEQUENCE KGGTGGSMVSKGEEELFTGVVPIVLVLDGDNVGHKFSVSGEGEDATYGL 200  
3EK4\_A | PDBID | CHAIN | SEQUENCE KGGTGGSMVSKGEEELFTGVVPIVLVLDGDNVGHKFSVSGEGEDATYGL 200  
3EK8\_A | PDBID | CHAIN | SEQUENCE KGGTGGSMVSKGEEELFTGVVPIVLVLDGDNVGHKFSVSGEGEDATYGL 200  
2G3D\_A | PDBID | CHAIN | SEQUENCE -----MASKGEEELFTGVVPIVLVLDGDNVGHKFSVSGEGEDATYGL 43  
2GZ5\_A | PDBID | CHAIN | SEQUENCE -----MASKGEEELFTGVVPIVLVLDGDNVGHKFSVSGEGEDATYGL 43  
1QYQ\_A | PDBID | CHAIN | SEQUENCE -----MASKGEEELFTGVVPIVLVLDGDNVGHKFSVSGEGEDATYGL 43  
2G6E\_A | PDBID | CHAIN | SEQUENCE -----MASKGEEELFTGVVPIVLVLDGDNVGHKFSVSGEGEDATYGL 43  
1YHL\_A | PDBID | CHAIN | SEQUENCE -----MASKGEEELFTGVVPIVLVLDGDNVGHKFSVSGEGEDATYGL 43  
1YHC\_B | PDBID | CHAIN | SEQUENCE -----MASKGEEELFTGVVPIVLVLDGDNVGHKFSVSGEGEDATYGL 43  
2G5Z\_A | PDBID | CHAIN | SEQUENCE -----MASKGEEELFTGVVPIVLVLDGDNVGHKFSVSGEGEDATYGL 43  
2G16\_A | PDBID | CHAIN | SEQUENCE -----MASKGEEELFTGVVPIVLVLDGDNVGHKFSVSGEGEDATYGL 43  
2HGD\_A | PDBID | CHAIN | SEQUENCE -----MASKGEEELFTGVVPIVLVLDGDNVGHKFSVSGEGEDATYGL 43  
2HYG\_A | PDBID | CHAIN | SEQUENCE -----MASKGEEELFTGVVPIVLVLDGDNVGHKFSVSGEGEDATYGL 43  
1YJF\_A | PDBID | CHAIN | SEQUENCE -----MASKGEEELFTGVVPIVLVLDGDNVGHKFSVSGEGEDATYGL 43  
1YHL\_A | PDBID | CHAIN | SEQUENCE -----MASKGEEELFTGVVPIVLVLDGDNVGHKFSVSGEGEDATYGL 43  
1YJ2\_A | PDBID | CHAIN | SEQUENCE -----MASKGEEELFTGVVPIVLVLDGDNVGHKFSVSGEGEDATYGL 43  
1QYF\_A | PDBID | CHAIN | SEQUENCE -----MASKGEEELFTGVVPIVLVLDGDNVGHKFSVSGEGEDATYGL 43  
1QXT\_A | PDBID | CHAIN | SEQUENCE -----MASKGEEELFTGVVPIVLVLDGDNVGHKFSVSGEGEDATYGL 43  
2A1M\_A | PDBID | CHAIN | SEQUENCE -----MASKGEEELFTGVVPIVLVLDGDNVGHKFSVSGEGEDATYGL 43  
2A1K\_A | PDBID | CHAIN | SEQUENCE -----MASKGEEELFTGVVPIVLVLDGDNVGHKFSVSGEGEDATYGL 43  
2A1J\_A | PDBID | CHAIN | SEQUENCE -----MASKGEEELFTGVVPIVLVLDGDNVGHKFSVSGEGEDATYGL 43  
2A1L\_A | PDBID | CHAIN | SEQUENCE -----MASKGEEELFTGVVPIVLVLDGDNVGHKFSVSGEGEDATYGL 43  
2HFC\_A | PDBID | CHAIN | SEQUENCE -----MASKGEEELFTGVVPIVLVLDGDNVGHKFSVSGEGEDATYGL 43  
2HCG\_A | PDBID | CHAIN | SEQUENCE -----MASKGEEELFTGVVPIVLVLDGDNVGHKFSVSGEGEDATYGL 43  
2QZ0\_A | PDBID | CHAIN | SEQUENCE -----MASKGEEELFTGVVPIVLVLDGDNVGHKFSVSGEGEDATYGL 43  
2FZU\_A | PDBID | CHAIN | SEQUENCE -----MASKGEEELFTGVVPIVLVLDGDNVGHKFSVSGEGEDATYGL 43  
1KYR\_A | PDBID | CHAIN | SEQUENCE -----MASKGEEELFTGVVPIVLVLDGDNVGHKFSVSGEGEDATYGL 43





1EMC\_A1|PDBID|CHAIN|SEQUENCE -----MASKGEELFTGVVPIILVELDGDVNGHKFVSVSSEGEDATYGL 43  
1EML\_A1|PDBID|CHAIN|SEQUENCE -----MASKGEELFTGVVPIILVELDGDVNGHKFVSVSSEGEDATYGL 43  
1EME\_A1|PDBID|CHAIN|SEQUENCE -----MASKGEELFTGVVPIILVELDGDVNGHKFVSVSSEGEDATYGL 43  
1EMK\_A1|PDBID|CHAIN|SEQUENCE -----MASKGEELFTGVVPIILVELDGDVNGHKFVSVSSEGEDATYGL 43  
2WUR\_A1|PDBID|CHAIN|SEQUENCE -----MSKGEELFTGVVPIILVELDGDVNGHKFVSVSSEGEDATYGL 42  
1GFL\_A1|PDBID|CHAIN|SEQUENCE -----ASKGEELFTGVVPIILVELDGDVNGHKFVSVSSEGEDATYGL 42  
1RM9\_A1|PDBID|CHAIN|SEQUENCE -----VSKGEELFTGVVPIILVELDGDVNGHKFVSVSSEGEDATYGL 42  
2WSN\_A1|PDBID|CHAIN|SEQUENCE -----MVSKEELFTGVVPIILVELDGDVNGHKFVSVSSEGEDATYGL 43  
2Q57\_A1|PDBID|CHAIN|SEQUENCE GLALPVATMSKGEELFTGVVPIILVELDGDVNGHKFVSVSSEGEDATYGL 60  
2WS0\_A1|PDBID|CHAIN|SEQUENCE -----MVSKEELFTGVVPIILVELDGDVNGHKFVSVSSEGEDATYGL 43  
10XF\_A1|PDBID|CHAIN|SEQUENCE -----SKGEELFTGVVPIILVELDGDVNGHKFVSVSSEGEDATYGL 41  
1CV7\_A1|PDBID|CHAIN|SEQUENCE -----MSKGEELFTGVVPIILVELDGDVNGHKFVSVSSEGEDATYGL 42  
3GEX\_A1|PDBID|CHAIN|SEQUENCE --LYFQGMVSKGEELFGGLVPIILVELDGDVNGHKFVSVSSEGEDATYGL 48  
10XD\_A1|PDBID|CHAIN|SEQUENCE -----MSKGEELFTGVVPIILVELDGDVNGHKFVSVSSEGEDATYGL 42  
10XE\_A1|PDBID|CHAIN|SEQUENCE -----MSKGEELFTGVVPIILVELDGDVNGHKFVSVSSEGEDATYGL 42  
3LVC\_A1|PDBID|CHAIN|SEQUENCE -----MSKGAELFTGLVPIILVELDGDVNGHKFVSVSSEGEDATYGL 42  
3LVD\_A1|PDBID|CHAIN|SEQUENCE -----MSKGAELFTGLVPIILVELDGDVNGHKFVSVSSEGEDATYGL 42  
3LVA\_A1|PDBID|CHAIN|SEQUENCE -----MSKGAELFTGLVPIILVELDGDVNGHKFVSVSSEGEDATYGL 42  
2HPW\_A1|PDBID|CHAIN|SEQUENCE ----MTALTEGAKLFEKEIPIYITELGDEVGMKFIKKEGTDATTGI 45  
2WIQ\_A1|PDBID|CHAIN|SEQUENCE VPRGSHMGSEGGPALFQSDMTFKIFIDGDEVNGQKFTIVADGSKKPFPHGF 64  
348S\_A1|PDBID|CHAIN|SEQUENCE ----HMGEPPALFQSDMTFKIFIDGDEVNGQKFTIVADGSKKPFPHGF 45  
2WIS\_A1|PDBID|CHAIN|SEQUENCE VPRGSHMGSEGGPALFQSDMTFKIFIDGDEVNGQKFTIVADGSKKPFPHGF 64  
3GB3\_A1|PDBID|CHAIN|SEQUENCE -----MEGGPALFQSDMTFKIFIDGDEVNGQKFTIVADGSKKPFPHGF 42  
3GL4\_A1|PDBID|CHAIN|SEQUENCE -----MEGGPALFQSDMTFKIFIDGDEVNGQKFTIVADGSKKPFPHGF 42  
244E\_A1|PDBID|CHAIN|SEQUENCE -----SALSNKFIGDDMKTYHMDGVNNGHYFTVKGEKPKPYEGT 53  
2448\_A1|PDBID|CHAIN|SEQUENCE -----SALSNKFIGDDMKTYHMDGVNNGHYFTVKGEKPKPYEGT 53  
2447\_A1|PDBID|CHAIN|SEQUENCE -----SALSNKFIGDDMKTYHMDGVNNGHYFTVKGEKPKPYEGT 53  
22M4\_A1|PDBID|CHAIN|SEQUENCE -----MVSIVKPEKMKRYMDGSVNGHEFTIEGEGTRPYEGH 39  
22M4\_A1|PDBID|CHAIN|SEQUENCE -----MVSIVKPEKMKRYMDGSVNGHEFTIEGEGTRPYEGH 39  
2206\_A1|PDBID|CHAIN|SEQUENCE QMGRDLYDDDDKMSVIKPEKMKRYMDGSVNGHEFTIEGEGTRPYEGH 69  
2207\_A1|PDBID|CHAIN|SEQUENCE -----DPTMVSIVKPEKMKRYMDGSVNGHEFTIEGEGTRPYEGH 42  
3BX9\_B1|PDBID|CHAIN|SEQUENCE RGSHHHHHGSMSLELITENHMKLYMEGTVNNHFKCTSEGEKPKPYEGT 51  
38XA\_A1|PDBID|CHAIN|SEQUENCE RGSHHHHHGSMSLELITENHMKLYMEGTVNNHFKCTSEGEKPKPYEGT 51  
38XB\_A1|PDBID|CHAIN|SEQUENCE RGSHHHHHGSMSLELITENHMKLYMEGTVNNHFKCTSEGEKPKPYEGT 51  
38XC\_A1|PDBID|CHAIN|SEQUENCE RGSHHHHHGSMSLELITENHMKLYMEGTVNNHFKCTSEGEKPKPYEGT 51  
3H10\_A1|PDBID|CHAIN|SEQUENCE -----MSELITENHMKLYMEGTVNNHFKCTSEGEKPKPYEGT 39  
3H1R\_A1|PDBID|CHAIN|SEQUENCE -----MSELITENHMKLYMEGTVNNHFKCTSEGEKPKPYEGT 39  
3M2Z\_A1|PDBID|CHAIN|SEQUENCE -----MVSKEELIKENHMKLYMEGTVNNHFKCTSEGEKPKPYEGT 43  
3M24\_A1|PDBID|CHAIN|SEQUENCE -----MSEELIKENHMKLYMEGTVNNHFKCTSEGEKPKPYEGT 40  
3IPZ\_A1|PDBID|CHAIN|SEQUENCE -----GVSKEELIKEDNHMKLYMEGTVNNHFKCTSEGEKPKPYEGT 43  
3E5T\_A1|PDBID|CHAIN|SEQUENCE GSHHHHHHGHMNSLKENMRMVMYMEGSVNGYQFKCTGEGDGNPYMG 52  
3E5V\_A1|PDBID|CHAIN|SEQUENCE GSHHHHHHGHMNSLKENMRMVMYMEGSVNGYQFKCTGEGDGNPYMG 52  
1UIS\_B1|PDBID|CHAIN|SEQUENCE -----IHMNSLKENMRMVMYMEGSVNGYQFKCTGEGDGNPYMG 41  
3E5W\_A1|PDBID|CHAIN|SEQUENCE GSHHHHHHGHMNSLKENMRMVMYMEGSVNGYQFKCTGEGDGNPYMG 52  
2A50\_A1|PDBID|CHAIN|SEQUENCE MRGSHHHHHHGSASFLKKTMPFKTTIEGTVNGHYFKCTGKGEKPKPYEGT 50  
2A52\_A1|PDBID|CHAIN|SEQUENCE MRGSHHHHHHGSASFLKKTMPFKTTIEGTVNGHYFKCTGKGEKPKPYEGT 50  
1XMZ\_A1|PDBID|CHAIN|SEQUENCE MRGSHHHHHHGSASFLKKTMPFKTTIEGTVNGHYFKCTGKGEKPKPYEGT 50  
2A54\_C1|PDBID|CHAIN|SEQUENCE MRGSHHHHHHGSASFLKKTMPFKTTIEGTVNGHYFKCTGKGEKPKPYEGT 50  
2A53\_A1|PDBID|CHAIN|SEQUENCE MRGSHHHHHHGSASFLKKTMPFKTTIEGTVNGHYFKCTGKGEKPKPYEGT 50  
2A56\_A1|PDBID|CHAIN|SEQUENCE MRGSHHHHHHGSASFLKKTMPFKTTIEGTVNGHYFKCTGKGEKPKPYEGT 50  
1XQL\_A1|PDBID|CHAIN|SEQUENCE -----MASLLETMPFKTTIEGTVNGHYFKCTGKGEKPKPYEGT 39  
3CF\_L1|PDBID|CHAIN|SEQUENCE -----MASLLETMPFRMTEGTVNGHYFKCTGKGEKPKPYEGT 39  
3CFH\_S1|PDBID|CHAIN|SEQUENCE -----MASLLETMPFRMTEGTVNGHYFKCTGKGEKPKPYEGT 39  
3CFAL1|PDBID|CHAIN|SEQUENCE -----MASLLETMPFRMTEGTVNGHYFKCTGKGEKPKPYEGT 39  
1YWL\_A1|PDBID|CHAIN|SEQUENCE -----MAGLLKESMRKMYMEGTVNGHYFKCEGEGDGNPFAGT 39  
2IB5\_A1|PDBID|CHAIN|SEQUENCE -----GSHMASKISDNVRIKLYMEGTVNNHFMCEAEGEKPYEGT 42  
2IB6\_A1|PDBID|CHAIN|SEQUENCE -----GSHMASKISDNVRIKLYMEGTVNNHFMCEAEGEKPYEGT 42  
2C91\_A1|PDBID|CHAIN|SEQUENCE -----MYSIKETMRVQLSMEGSVNGHYFKCTGKGEKPKPYEGT 39  
SHHHHHHGRSSKNVKEFMRFKVRMEGTVNGHEFIEGEGGRPYEGH 53  
167K\_A1|PDBID|CHAIN|SEQUENCE -----MRSSKNVKEFMRFKVRMEGTVNGHEFIEGEGGRPYEGH 42  
12G0\_A1|PDBID|CHAIN|SEQUENCE -----MRSSKNVKEFMRFKVRMEGTVNGHEFIEGEGGRPYEGH 42  
16G6\_A1|PDBID|CHAIN|SEQUENCE -----MRSSKNVKEFMRFKVRMEGTVNGHEFIEGEGGRPYEGH 42  
12G0\_H1|PDBID|CHAIN|SEQUENCE -----MRSSKNVKEFMRFKVRMEGTVNGHEFIEGEGGRPYEGH 42  
12GP\_A1|PDBID|CHAIN|SEQUENCE -----MRSSKNVKEFMRFKVRMEGTVNGHEFIEGEGGRPYEGH 42  
2H8Q\_A1|PDBID|CHAIN|SEQUENCE -----VIKEFMRFKVRMEGTVNGHEFIEGEGGRPYEGH 42  
2VAE\_A1|PDBID|CHAIN|SEQUENCE -----MASSEVDIKEFMRFKVRMEGSVNGHEFIEGEGGRPYEGT 42  
2V4E\_A1|PDBID|CHAIN|SEQUENCE -----NVIKPFMRKVRMEGSVNGHEFIEGEGGRPYEGT 37  
2VAD\_A1|PDBID|CHAIN|SEQUENCE -----MDNTEVDIKEFMRFKVRMEGSVNGHYFIEGEGGRPYEGT 42  
2H5P\_A1|PDBID|CHAIN|SEQUENCE ---MVSKEENMAIIEFMRFKVRMEGSVNGHEFIEGEGGRPYEGT 47  
2H5R\_A1|PDBID|CHAIN|SEQUENCE ---MVSKEENMAIIEFMRFKVRMEGSVNGHEFIEGEGGRPYEGT 47  
2H5Q\_A1|PDBID|CHAIN|SEQUENCE ---MVSKEENMAIIEFMRFKVRMEGSVNGHEFIEGEGGRPYEGT 47  
2QLG\_A1|PDBID|CHAIN|SEQUENCE ---MVSKEE---VIKEFMRFKVRMEGSVNGHEFIEGEGGRPYEGT 43  
2QLT\_A1|PDBID|CHAIN|SEQUENCE ---MVSKEE---VIKEFMRFKVRMEGSVNGHEFIEGEGGRPYEGT 43  
2QLH\_A1|PDBID|CHAIN|SEQUENCE ---MVSKEE---VIKEFMRFKVRMEGSVNGHEFIEGEGGRPYEGT 43  
2H5Q\_A1|PDBID|CHAIN|SEQUENCE ---MVSKEEDMAIIEFMRFKVRMEGSVNGHEFIEGEGGRPYEGT 47  
3KCS\_A1|PDBID|CHAIN|SEQUENCE ---MVSKEEDMAIIEFMRFKVRMEGSVNGHYFIEGEGGRPYEGT 47  
3KCT\_A1|PDBID|CHAIN|SEQUENCE ---MVSKEEDMAIIEFMRFKVRMEGSVNGHYFIEGEGGRPYEGT 47  
3LF3\_A1|PDBID|CHAIN|SEQUENCE -----EEDMAIIEFMRFKVRMEGSVNGHEFIEGEGGRPYEGT 42  
31F4\_A1|PDBID|CHAIN|SEQUENCE -----EEDMAIIEFMRFKVRMEGSVNGHEFIEGEGGRPYEGT 42  
2P4M\_A1|PDBID|CHAIN|SEQUENCE -----MSVIATQMTYKYVMSGTVNGHYFEVEGDGKPKPYEG 38  
2ARL\_A1|PDBID|CHAIN|SEQUENCE -----GSVIATQMTYKYVMSGTVNGHYFEVEGDGKPKPYEG 38  
1MOV\_A1|PDBID|CHAIN|SEQUENCE -----GCVIATQMTYKYVMSGTVNGHYFEVEGDGKPKPYEG 38  
1M0L\_A1|PDBID|CHAIN|SEQUENCE -----GCVIATQMTYKYVMSGTVNGHYFEVEGDGKPKPYEG 38  
2WH5\_A1|PDBID|CHAIN|SEQUENCE HSSGLVPRGSHMVSIAKQMTYKYVMSGTVNGHYFEVEGDGKPKPYEG 59  
2WHT\_A1|PDBID|CHAIN|SEQUENCE HSSGLVPRGSHMVSIAKQMTYKYVMSGTVNGHYFEVEGDGKPKPYEG 59  
2WHU\_A1|PDBID|CHAIN|SEQUENCE HSSGLVPRGSHMVSIAKQMTYKYVMSGTVNGHYFEVEGDGKPKPYEG 59  
3TR8\_A1|PDBID|CHAIN|SEQUENCE --SS-----VSVIAKQMTYKYVMSGTVNGHYFEVEGDGKPKPYEG 40  
3CGL\_A1|PDBID|CHAIN|SEQUENCE SHHHHHHGSCKSVIKEMLIDLHLEGTNGHYFIEKGGKQPPNEG 53  
226Z\_A1|PDBID|CHAIN|SEQUENCE GRDLYDDDDKDPMSVIAKQMTYKYVMSGTVNGHYFEVEGDGKPKPYEG 71  
210V\_A1|PDBID|CHAIN|SEQUENCE GRDLYDDDDKDPMSVIAKQMTYKYVMSGTVNGHYFEVEGDGKPKPYEG 71  
2POX\_A1|PDBID|CHAIN|SEQUENCE GRDLYDDDDKDPMSVIAKQMTYKYVMSGTVNGHYFEVEGDGKPKPYEG 71  
2IEZ\_A1|PDBID|CHAIN|SEQUENCE -----MVSIVKDPDKIKLRMEGAVNGHPPFAIEGVLGKPFPEGK 38  
2210\_A1|PDBID|CHAIN|SEQUENCE -----SHMSVIAKQMTYKYVMSGTVNGHYFEVEGDGKPKPYEG 41  
226Y\_A1|PDBID|CHAIN|SEQUENCE -----SHMSVIAKQMTYKYVMSGTVNGHYFEVEGDGKPKPYEG 41  
26XZ\_A1|PDBID|CHAIN|SEQUENCE -----SMVSIVKDPDKIKLRMEGAVNGHPPFAIEGVLGKPFPEGK 57  
26X0\_B1|PDBID|CHAIN|SEQUENCE -----SMVSIVKDPDKIKLRMEGAVNGHPPFAIEGVLGKPFPEGK 57  
226X\_A1|PDBID|CHAIN|SEQUENCE GRDLYDDDDKDPMSVIAKQMTYKYVMSGTVNGHYFEVEGDGKPKPYEG 71  
31S3\_A1|PDBID|CHAIN|SEQUENCE -----TDPMSVIAKQMTYKYVMSGTVNGHYFEVEGDGKPKPYEG 51  
31SA\_A1|PDBID|CHAIN|SEQUENCE -----TDPMSVIAKQMTYKYVMSGTVNGHYFEVEGDGKPKPYEG 51  
2DDC\_A1|PDBID|CHAIN|SEQUENCE -----VSVITSEMKEIVRMEGAVNGHFKVITTKGSGQPPFEG 38  
2DDD\_A1|PDBID|CHAIN|SEQUENCE -----VSVITSEMKEIVRMEGAVNGHFKVITTKGSGQPPFEG 38  
1X5S\_A1|PDBID|CHAIN|SEQUENCE -----VSVITSEMKEIVRMEGAVNGHFKVITTKGSGQPPFEG 38  
2VVL\_A1|PDBID|CHAIN|SEQUENCE -----HMSAIKDPDKIKLRMEGAVNGHFFVITDGGTKPFPEGK 40  
2VHH\_A1|PDBID|CHAIN|SEQUENCE -----HMSAIKDPDKIKLRMEGAVNGHFFVITDGGTKPFPEGK 40  
2VJ3\_A1|PDBID|CHAIN|SEQUENCE -----HMSAIKDPDKIKLRMEGAVNGHFFVITDGGTKPFPEGK 40  
12UX\_A1|PDBID|CHAIN|SEQUENCE -----MSAIKDPDKIKLRMEGAVNGHFFVITDGGTKPFPEGK 40

Supplementary Material (ESI) for Molecular BioSystems  
This journal is (c) The Royal Society of Chemistry, 2011

```
2BTJ_A | PDBID | CHAIN | SEQUENCE -----GGAIKPDMKINLRMEGNVNGHFVLDGOGTKPFEGKQ 38
2GW3_A | PDBID | CHAIN | SEQUENCE -----APMSLIKPEMKIKLLMEGNVNGHFVIEGDGKHPFEGKQ 40
2GW4_A | PDBID | CHAIN | SEQUENCE -----APMSLIKPEMKIKLLMEGNVNGHFVIEGDGKHPFEGKQ 40
2OTE_A | PDBID | CHAIN | SEQUENCE -----GVIKPDMKIKLMEGNVNGHFVIEGEGEKPPYDGTN 37
2OTB_A | PDBID | CHAIN | SEQUENCE -----GVIKPDMKIKLMEGNVNGHFVIEGEGEKPPYDGTN 37
2HQK_A | PDBID | CHAIN | SEQUENCE -----GVIKPDMKIKLMEGNVNGHFVIEGEGEKPPYDGTN 37
2VZK_A | PDBID | CHAIN | SEQUENCE -----MNLKEDMRVKVHMEGNVNGHFVIEGEGEKPPYEGTQ 38
3ADF_A | PDBID | CHAIN | SEQUENCE -----GAHMSVIKPEMKIKLMRGTVNGHNFVIEGEGKGNPYEGTQ 41
21CR_A | PDBID | CHAIN | SEQUENCE MRGSHHHHHHGSAGLTDMMHFRMEGCVDGHKFVIEGNGNPNPKGKQ 50
2FL1_A | PDBID | CHAIN | SEQUENCE -----SAHGLTDDMTMFRMEGCVDGHKFVIEGNGNPNPKGKQ 39
20GR_A | PDBID | CHAIN | SEQUENCE -----MAHSHKGLKEEMTKYHMEGCVNGHKFVITGEGIYPPFKGKQ 42
1XAE_A | PDBID | CHAIN | SEQUENCE -----MAHSHKGLKEEMTKYHMEGCVNGHKFVITGEGIYPPFKGKQ 42
1XA9_A | PDBID | CHAIN | SEQUENCE -----MAHSHKGLKEEMTKYHMEGCVNGHKFVITGEGIYPPFKGKQ 42
2PX5_A | PDBID | CHAIN | SEQUENCE -----SKHGLTKEMTKYHMEGCVDGHKFVITGEGIYPPFKGKQ 39
2PXW_A | PDBID | CHAIN | SEQUENCE -----SKHGLTKEMTKYHMEGCVDGHKFVITGEGIYPPFKGKQ 39
20JK_A | PDBID | CHAIN | SEQUENCE -----MAQSKHGLTKEMTKYHMEGCVDGHKFVITGEGIYPPFKGKQ 42
2RH7_A | PDBID | CHAIN | SEQUENCE -----MDLAKLGLKEEMTKYHMEGCVNGHKFVITGEGIYPPFKGKQ 42
2C9J_H | PDBID | CHAIN | SEQUENCE -----MSQLDNNLSVSYMKGNNVHFEYDGGDDPNSGQF 38
2G6X_A | PDBID | CHAIN | SEQUENCE -----LPAMEIECRITGTLNGVEFELVGGGEGTPEQGRM 34
2G6Y_A | PDBID | CHAIN | SEQUENCE -----LPAMEIECRITGTLNGVEFELVGGGEGTPEQGRM 34
2G3O_A | PDBID | CHAIN | SEQUENCE -----MPAMKIECRITGTLNGVEFELVGGGEGTPEQGRM 34
2D07_A | PDBID | CHAIN | SEQUENCE -----TTFKIESRIHGNLNGEKFELVGGVGVG--EEGR 31
2D09_D | PDBID | CHAIN | SEQUENCE -----TTFKIESRIHGNLNGEKFELVGGVGVG--EEGR 31
. . . * . . . *
3EKJ_A | PDBID | CHAIN | SEQUENCE TLKFICT---TGKLPVPWPPTLVTTLYGVQCFSRYPDHMKHQDFFSAMP 247
3EVR_A | PDBID | CHAIN | SEQUENCE TLKFICT---TGKLPVPWPPTLVTTLYGVQCFSRYPDHMKHQDFFSAMP 190
3EKH_A | PDBID | CHAIN | SEQUENCE TLKFICT---TGKLPVPWPPTLVTTLYGVQCFSRYPDHMKHQDFFSAMP 247
3EVR_A | PDBID | CHAIN | SEQUENCE TLKFICT---TGKLPVPWPPTLVTTLYGVQCFSRYPDHMKHQDFFSAMP 210
3EK7_A | PDBID | CHAIN | SEQUENCE TLKFICT---TGKLPVPWPPTLVTTLYGVQCFSRYPDHMKHQDFFSAMP 247
3EVL_A | PDBID | CHAIN | SEQUENCE TLKFICT---TGKLPVPWPPTLVTTLYGVQCFSRYPDHMKHQDFFSAMP 247
3EVD_A | PDBID | CHAIN | SEQUENCE TLKFICT---TGKLPVPWPPTLVTTLYGVQCFSRYPDHMKHQDFFSAMP 247
3EK4_A | PDBID | CHAIN | SEQUENCE TLKFICT---TGKLPVPWPPTLVTTLYGVQCFSRYPDHMKHQDFFSAMP 247
3EK8_A | PDBID | CHAIN | SEQUENCE TLKFICT---TGKLPVPWPPTLVTTLYGVQCFSRYPDHMKHQDFFSAMP 247
2G3O_A | PDBID | CHAIN | SEQUENCE TLKFICT---TGKLPVPWPPTLVTTLYGVQCFSRYPDHMKHQDFFSAMP 90
2G2S_A | PDBID | CHAIN | SEQUENCE TLKFICT---TGKLPVPWPPTLVTTLYGVQCFSRYPDHMKHQDFFSAMP 90
1QYQ_A | PDBID | CHAIN | SEQUENCE TLKFICT---TGKLPVPWPPTLVTTLYG--VQCFSRYPDHMKHQDFFSAMP 88
2G6E_A | PDBID | CHAIN | SEQUENCE TLKFICT---TGKLPVPWPPTLVTTLYGAVQCFSRYPDHMKHQDFFSAMP 90
1YH1_A | PDBID | CHAIN | SEQUENCE TLKFICT---TGKLPVPWPPTLVTTLYGAVQCFSRYPDHMKHQDFFSAMP 90
1YH2_A | PDBID | CHAIN | SEQUENCE TLKFICT---TGKLPVPWPPTLVTTLYGAVQCFSRYPDHMKHQDFFSAMP 90
2G52_A | PDBID | CHAIN | SEQUENCE TLKFICT---TGKLPVPWPPTLVTTLYGAVQCFSRYPDHMKHQDFFSAMP 90
2G16_A | PDBID | CHAIN | SEQUENCE TLKFICT---TGKLPVPWPPTLVTTLYGAVQCFSRYPDHMKHQDFFSAMP 89
2HGD_A | PDBID | CHAIN | SEQUENCE TLKFICT---TGKLPVPWPPTLVTTLYGAVQCFSRYPDHMKHQDFFSAMP 90
2HYG_A | PDBID | CHAIN | SEQUENCE TLKFICT---TGKLPVPWPPTLVTTLYGAVQCFSRYPDHMKHQDFFSAMP 90
1YJF_A | PDBID | CHAIN | SEQUENCE TLKFICT---TGKLPVPWPPTLVTTLYGAVQCFSRYPDHMKHQDFFSAMP 90
1YH1_A | PDBID | CHAIN | SEQUENCE TLKFICT---TGKLPVPWPPTLVTTLYGAVQCFSRYPDHMKHQDFFSAMP 90
1YJ2_A | PDBID | CHAIN | SEQUENCE TLKFICT---TGKLPVPWPPTLVTTLYGAVQCFSRYPDHMKHQDFFSAMP 90
1QYF_A | PDBID | CHAIN | SEQUENCE TLKFICT---TGKLPVPWPPTLVTTLYGVQCFSRYPDHMKHQDFFSAMP 90
1QXT_A | PDBID | CHAIN | SEQUENCE TLKFICT---TGKLPVPWPPTLVTTLYGVQCFSRYPDHMKHQDFFSAMP 90
2A1M_A | PDBID | CHAIN | SEQUENCE TLKFICT---TGKLPVPWPPTLVTTLYGVQCFSRYPDHMKHQDFFSAMP 90
2A1K_A | PDBID | CHAIN | SEQUENCE TLKFICT---TGKLPVPWPPTLVTTLYGVQCFSRYPDHMKHQDFFSAMP 90
2A1J_A | PDBID | CHAIN | SEQUENCE TLKFICT---TGKLPVPWPPTLVTTLYGVQCFSRYPDHMKHQDFFSAMP 90
2A1L_A | PDBID | CHAIN | SEQUENCE TLKFICT---TGKLPVPWPPTLVTTLYGVQCFSRYPDHMKHQDFFSAMP 90
2HFC_A | PDBID | CHAIN | SEQUENCE TLKFICT---TGKLPVPWPPTLVTTLYGVQCFSRYPDHMKHQDFFSAMP 90
2HCG_A | PDBID | CHAIN | SEQUENCE TLKFICT---TGKLPVPWPPTLVTTLYGVQCFSRYPDHMKHQDFFSAMP 90
2QZ0_A | PDBID | CHAIN | SEQUENCE TLKFICT---TGKLPVPWPPTLVTTLYGVQCFSRYPDHMKHQDFFSAMP 90
2FZU_A | PDBID | CHAIN | SEQUENCE TLKFICT---TGKLPVPWPPTLVTTLYGVQCFSRYPDHMKHQDFFSAMP 90
1KYR_A | PDBID | CHAIN | SEQUENCE TLKFICT---TGKLPVPWPPTLVTTLYGVQCFSRYPDHMKHQDFFSAMP 90
1KYP_A | PDBID | CHAIN | SEQUENCE TLKFICT---TGKLPVPWPPTLVTTLYGVQCFSRYPDHMKHQDFFSAMP 90
1KYS_A | PDBID | CHAIN | SEQUENCE TLKFICT---TGKLPVPWPPTLVTTLYGVQCFSRYPDHMKHQDFFSAMP 90
2FQW_A | PDBID | CHAIN | SEQUENCE TLKFICT---TGKLPVPWPPTLVTTLYGVQCFSRYPDHMKHQDFFSAMP 90
189C_D | PDBID | CHAIN | SEQUENCE TLKFICT---TGKLPVPWPPTLVTTLYGVQCFSRYPDHMKHQDFFSAMP 89
1MYW_A | PDBID | CHAIN | SEQUENCE TLKLICT---TGKLPVPWPPTLVTTLYGGLQCFARYPDHMKHQDFFSAMP 90
3ED8_A | PDBID | CHAIN | SEQUENCE TLKFICT---TGKLPVPWPPTLVTTLYGGLQCFARYPDHMKHQDFFSAMP 89
1QY0_A | PDBID | CHAIN | SEQUENCE TLKFICT---TGKLPVPWPPTLVTTLYGGLQCFARYPDHMKHQDFFSAMP 89
2QUL_A | PDBID | CHAIN | SEQUENCE TLKFICT---TGKLPVPWPPTLVTTLYGVQCFSRYPDHMKHQDFFSAMP 92
1QY3_A | PDBID | CHAIN | SEQUENCE TLKFICT---TGKLPVPWPPTLVTTLYGVQCFSRYPDHMKHQDFFSAMP 89
2QZT_A | PDBID | CHAIN | SEQUENCE TLKFICT---TGKLPVPWPPTLVTTLYGVQCFSRYPDHMKHQDFFSAMP 89
2QRF_A | PDBID | CHAIN | SEQUENCE TLKFICT---TGKLPVPWPPTLVTTLYGVQCFSRYPDHMKHQDFFSAMP 89
2HRS_A | PDBID | CHAIN | SEQUENCE TLKFICT---TGKLPVPWPPTLVTTLYGVQCFSRYPDHMKHQDFFSAMP 89
2B3Q_D | PDBID | CHAIN | SEQUENCE TLKFICT---TGKLPVPWPPTLVTTLYGVQCFSRYPDHMKHQDFFSAMP 89
2B3P_A | PDBID | CHAIN | SEQUENCE TLKFICT---TGKLPVPWPPTLVTTLYGVQCFSRYPDHMKHQDFFSAMP 89
1KPS_A | PDBID | CHAIN | SEQUENCE TLKFICT---TGKLPVPWPPTLVTTLYGVQCFSRYPDHMKHQDFFSAMP 99
3G1J_A | PDBID | CHAIN | SEQUENCE TLKFICT---TGKLPVPWPPTLVTTLYGVQCFSRYPDHMKHQDFFSAMP 90
3GJ2_A | PDBID | CHAIN | SEQUENCE TLKFICT---TGKLPVPWPPTLVTTLYGVQCFSRYPDHMKHQDFFSAMP 90
3G9A_A | PDBID | CHAIN | SEQUENCE TLKFICT---TGKLPVPWPPTLVTTLYGVQCFSRYPDHMKHQDFFSAMP 89
3K1K_B | PDBID | CHAIN | SEQUENCE TLKFICT---TGKLPVPWPPTLVTTLYGVQCFSRYPDHMKHQDFFSAMP 89
1J0C_A | PDBID | CHAIN | SEQUENCE TLKFIST---TGKLPVPWPPTLVTTLYGVQCFSRYPDHMKHQDFFSAMP 89
1J1C_A | PDBID | CHAIN | SEQUENCE TLKFIST---TGKLPVPWPPTLVTTLYGVQCFSRYPDHMKHQDFFSAMP 89
2A48_B | PDBID | CHAIN | SEQUENCE TLKFIST---TGKLPVPWPPTLVTTLYGVQCFSRYPDHMKHQDFFSAMP 89
2A4A_A | PDBID | CHAIN | SEQUENCE TLKFIST---TGKLPVPWPPTLVTTLYGVQCFSRYPDHMKHQDFFSAMP 89
3CD1_A | PDBID | CHAIN | SEQUENCE TLKFIST---TGKLPVPWPPTLVTTLYGVQCFSRYPDHMKHQDFFSAMP 100
3CD9_A | PDBID | CHAIN | SEQUENCE TLKFIST---TGKLPVPWPPTLVTTLYGVQCFSRYPDHMKHQDFFSAMP 100
3CB9_A | PDBID | CHAIN | SEQUENCE TLKFIST---TGKLPVPWPPTLVTTLYGVQCFSRYPDHMKHQDFFSAMP 100
3CBE_A | PDBID | CHAIN | SEQUENCE TLKFIST---TGKLPVPWPPTLVTTLYGVQCFSRYPDHMKHQDFFSAMP 100
20KW_F | PDBID | CHAIN | SEQUENCE TLKFICT---TGKLPVPWPPTLVTTLYGVQCFSRYPDHMKHQDFFSAMP 89
20KY_B | PDBID | CHAIN | SEQUENCE TLKFICT---TGKLPVPWPPTLVTTLYGVQCFSRYPDHMKHQDFFSAMP 89
2HQZ_A | PDBID | CHAIN | SEQUENCE TLKFICT---TGKLPVPWPPTLVTTLYGVQCFSRYPDHMKHQDFFSAMP 89
2HJ0_A | PDBID | CHAIN | SEQUENCE TLKFICT---TGKLPVPWPPTLVTTLYGVQCFSRYPDHMKHQDFFSAMP 89
202B_A | PDBID | CHAIN | SEQUENCE TLKFICT---TGKLPVPWPPTLVTTLYGVQCFSRYPDHMKHQDFFSAMP 95
2H9W_A | PDBID | CHAIN | SEQUENCE TLKFICT---TGKLPVPWPPTLVTTLYGVQCFSRYPDHMKHQDFFSAMP 92
2024_A | PDBID | CHAIN | SEQUENCE TLKFICT---TGKLPVPWPPTLVTTLYGVQCFSRYPDHMKHQDFFSAMP 95
2029_A | PDBID | CHAIN | SEQUENCE TLKFICT---TGKLPVPWPPTLVTTLYGVQCFSRYPDHMKHQDFFSAMP 95
2H6V_A | PDBID | CHAIN | SEQUENCE TLKFICT---TGKLPVPWPPTLVTTLYGVQCFSRYPDHMKHQDFFSAMP 95
1RMO_A | PDBID | CHAIN | SEQUENCE TLKFICT---TGKLPVPWPPTLVTTLYGVQCFSRYPDHMKHQDFFSAMP 89
1R1M_A | PDBID | CHAIN | SEQUENCE TLKFICT---TGKLPVPWPPTLVTTLYGVQCFSRYPDHMKHQDFFSAMP 88
1R1P_A | PDBID | CHAIN | SEQUENCE TLKFICT---TGKLPVPWPPTLVTTLYGVQCFSRYPDHMKHQDFFSAMP 88
1R1X_A | PDBID | CHAIN | SEQUENCE TLKFICT---TGKLPVPWPPTLVTTLYGVQCFSRYPDHMKHQDFFSAMP 88
2Q6P_A | PDBID | CHAIN | SEQUENCE TLKFICT---TGKLPVPWPPTLVTTLYGVQCFSRYPDHMKHQDFFSAMP 89
121Q_A | PDBID | CHAIN | SEQUENCE TLKFICT---TGKLPVPWPPTLVTTLYGVQCFSRYPDHMKHQDFFSAMP 89
156Z_A | PDBID | CHAIN | SEQUENCE TLKFICT---TGKLPVPWPPTLVTTLYGVQCFSRYPDHMKHQDFFSAMP 89
121P_A | PDBID | CHAIN | SEQUENCE TLKFICT---TGKLPVPWPPTLVTTLYGVQCFSRYPDHMKHQDFFSAMP 89
1F0B_A | PDBID | CHAIN | SEQUENCE TLKFICT---TGKLPVPWPPTLVTTLYGGLQCFARYPDHMKHQDFFSAMP 89
1F09_A | PDBID | CHAIN | SEQUENCE TLKFICT---TGKLPVPWPPTLVTTLYGGLQCFARYPDHMKHQDFFSAMP 89
2YFP_A | PDBID | CHAIN | SEQUENCE TLKFICT---TGKLPVPWPPTLVTTLYGGLQCFARYPDHMKHQDFFSAMP 89
```













Supplementary Material (ESI) for Molecular BioSystems  
This journal is (c) The Royal Society of Chemistry, 2011

1RM0\_A | PDBID | CHAIN | SEQUENCE ILGHKLEYNNSH-NVYIMA-----DKQKNG 160  
1RM1\_A | PDBID | CHAIN | SEQUENCE ILGHKLEYNNSH-NVYIMA-----DKQKNG 159  
1RMP\_A | PDBID | CHAIN | SEQUENCE ILGHKLEYNNSH-NVYIMA-----DKQKNG 159  
1RRX\_A | PDBID | CHAIN | SEQUENCE ILGHKLEYNNSH-NVYIMA-----DKQKNG 159  
2Q6P\_A | PDBID | CHAIN | SEQUENCE ILGHKLEYNNSH-NVYIMA-----DKQKNG 160  
121Q\_A | PDBID | CHAIN | SEQUENCE ILGHKLEYNNSH-NVYIMA-----DKQKNG 160  
156Z\_A | PDBID | CHAIN | SEQUENCE ILGHKLEYNNSH-NVYIMA-----DKQKNG 160  
121P\_A | PDBID | CHAIN | SEQUENCE ILGHKLEYNNSH-NVYIMA-----DKQKNG 160  
1F0B\_A | PDBID | CHAIN | SEQUENCE ILGHKLEYNNSQ-NVYIMA-----DKQKNG 160  
1F09\_A | PDBID | CHAIN | SEQUENCE ILGHKLEYNNSQ-NVYIMA-----DKQKNG 160  
2YFP\_A | PDBID | CHAIN | SEQUENCE ILGHKLEYNNSG-NVYIMA-----DKQKNG 160  
3D08\_A | PDBID | CHAIN | SEQUENCE ILGHKLEYNNSH-NVYIMA-----DKQKNG 165  
3D01\_A | PDBID | CHAIN | SEQUENCE ILGHKLEYNNSH-NVYIMA-----DKQKNG 165  
3D09\_A | PDBID | CHAIN | SEQUENCE ILGHKLEYNNSH-NVYIMA-----DKQKNG 165  
3D0A\_A | PDBID | CHAIN | SEQUENCE ILGHKLEYNNSH-NVYIMA-----DKQKNG 165  
3D0C\_A | PDBID | CHAIN | SEQUENCE ILGHKLEYNNSH-NVYIMA-----DKQKNG 165  
3D0D\_A | PDBID | CHAIN | SEQUENCE ILGHKLEYNNSH-NVYIMA-----DKQKNG 165  
3D0E\_A | PDBID | CHAIN | SEQUENCE ILGHKLEYNNSH-NVYIMA-----DKQKNG 165  
3D0F\_A | PDBID | CHAIN | SEQUENCE ILGHKLEYNNSH-NVYIMA-----DKQKNG 165  
3D0H\_A | PDBID | CHAIN | SEQUENCE ILGHKLEYNNSH-NVYIMA-----DKQKNG 165  
3D0I\_A | PDBID | CHAIN | SEQUENCE ILGHKLEYNNSH-NVYIMA-----DKQKNG 165  
3D0J\_A | PDBID | CHAIN | SEQUENCE ILGHKLEYNNSH-NVYIMA-----DKQKNG 165  
3D0K\_A | PDBID | CHAIN | SEQUENCE ILGHKLEYNNSH-NVYIMA-----DKQKNG 165  
3D0L\_A | PDBID | CHAIN | SEQUENCE ILGHKLEYNNSH-NVYIMA-----DKQKNG 165  
3D0M\_A | PDBID | CHAIN | SEQUENCE ILGHKLEYNNSH-NVYIMA-----DKQKNG 165  
3D0N\_A | PDBID | CHAIN | SEQUENCE ILGHKLEYNNSH-NVYIMA-----DKQKNG 165  
3D0O\_A | PDBID | CHAIN | SEQUENCE ILGHKLEYNNSH-NVYIMA-----DKQKNG 165  
3D0Q\_A | PDBID | CHAIN | SEQUENCE ILGHKLEYNNSH-NVYIMA-----DKQKNG 165  
3D0R\_A | PDBID | CHAIN | SEQUENCE ILGHKLEYNNSH-NVYIMA-----DKQKNG 165  
3D0S\_A | PDBID | CHAIN | SEQUENCE ILGHKLEYNNSH-NVYIMA-----DKQKNG 165  
3D0T\_A | PDBID | CHAIN | SEQUENCE ILGHKLEYNNSH-NVYIMA-----DKQKNG 165  
3D0U\_A | PDBID | CHAIN | SEQUENCE ILGHKLEYNNSH-NVYIMA-----DKQKNG 165  
3D0V\_A | PDBID | CHAIN | SEQUENCE ILGHKLEYNNSH-NVYIMA-----DKQKNG 165  
3D0W\_A | PDBID | CHAIN | SEQUENCE ILGHKLEYNNSH-NVYIMA-----DKQKNG 165  
3D0X\_A | PDBID | CHAIN | SEQUENCE ILGHKLEYNNSH-NVYIMA-----DKQKNG 165  
3D0Z\_A | PDBID | CHAIN | SEQUENCE ILGHKLEYNNSH-NVYIMA-----DKQKNG 165  
3DQ2\_A | PDBID | CHAIN | SEQUENCE ILGHKLEYNNSH-NVYIMA-----DKQKNG 165  
3DQ3\_A | PDBID | CHAIN | SEQUENCE ILGHKLEYNNSH-NVYIMA-----DKQKNG 165  
1HUY\_A | PDBID | CHAIN | SEQUENCE ILGHKLEYNNSH-NVYIMA-----DKQKNG 163  
1YFP\_A | PDBID | CHAIN | SEQUENCE ILGHKLEYNNSH-NVYIMA-----DKQKNG 158  
2JAD\_A | PDBID | CHAIN | SEQUENCE ILGHKLEYNNSH-CVYIVA-----DKQKNG 160  
1H6R\_A | PDBID | CHAIN | SEQUENCE ILGHKLEYNNSH-CVYIVA-----DKQKNG 160  
1C4F\_A | PDBID | CHAIN | SEQUENCE ILGHKLEYNNSH-NVYIMA-----DKQKNG 160  
1EMB\_A | PDBID | CHAIN | SEQUENCE ILGHKLEYNNSH-NVYIMA-----DKQKNG 160  
1Q4A\_A | PDBID | CHAIN | SEQUENCE ILGHKLEYNNSH-NVYIMA-----DKQKNG 160  
1EMA\_A | PDBID | CHAIN | SEQUENCE ILGHKLEYNNSH-NVYIMA-----DKQKNG 160  
1Q4B\_A | PDBID | CHAIN | SEQUENCE ILGHKLEYNNSH-NVYIMA-----DKQKNG 160  
1EMG\_A | PDBID | CHAIN | SEQUENCE ILGHKLEYNNSH-NVYIMA-----DKQKNG 160  
2DUF\_A | PDBID | CHAIN | SEQUENCE ILGHKLEYNNSD-NVYIMA-----DKQKNG 160  
2DUJ\_A | PDBID | CHAIN | SEQUENCE ILGHKLEYNNSD-NVYIMA-----DKQKNG 160  
2DUI\_A | PDBID | CHAIN | SEQUENCE ILGHKLEYNNSD-NVYIMA-----DKQKNG 160  
2DUG\_A | PDBID | CHAIN | SEQUENCE ILGHKLEYNNSN-NVYIMA-----DKQKNG 160  
2DUH\_A | PDBID | CHAIN | SEQUENCE ILGHKLEYNNSN-NVYIMA-----DKQKNG 160  
1Q4E\_A | PDBID | CHAIN | SEQUENCE ILGHKLEYNNSH-NVYIMA-----DKQKNG 160  
1Q73\_A | PDBID | CHAIN | SEQUENCE ILGHKLEYNNSH-NVYIMA-----DKQKNG 160  
1Q4D\_A | PDBID | CHAIN | SEQUENCE ILGHKLEYNNSH-NVYIMA-----DKQKNG 160  
1Q4C\_A | PDBID | CHAIN | SEQUENCE ILGHKLEYNNSH-NVYIMA-----DKQKNG 160  
1J8Z\_A | PDBID | CHAIN | SEQUENCE ILGHKLEYNNSG-NVYIMA-----DKQKNG 160  
1J8Y\_A | PDBID | CHAIN | SEQUENCE ILGHKLEYNNSG-NVYIMA-----DKQKNG 160  
1W75\_D | PDBID | CHAIN | SEQUENCE ILGHKLEYNNSH-NVYIMA-----DKQKNG 160  
1W7U\_D | PDBID | CHAIN | SEQUENCE ILGHKLEYNNSH-NVYIMA-----DKQKNG 160  
1W7T\_D | PDBID | CHAIN | SEQUENCE ILGHKLEYNNSH-NVYIMA-----DKQKNG 160  
1HCJ\_A | PDBID | CHAIN | SEQUENCE ILGHKLEYNNSH-NVYIMA-----DKQKNG 160  
2QLE\_A | PDBID | CHAIN | SEQUENCE ILGHKLEYNNSH-NVYIMA-----DKQKNG 160  
1BFP\_A | PDBID | CHAIN | SEQUENCE ILGHKLEYNNSH-NVYIMA-----DKQKNG 160  
2EMO\_A | PDBID | CHAIN | SEQUENCE ILGHKLEYNNSH-NVYIMA-----DKQKNG 161  
1EMF\_A | PDBID | CHAIN | SEQUENCE ILGHKLEYNNSH-NVYIMA-----DKQKNG 161  
2EMD\_A | PDBID | CHAIN | SEQUENCE ILGHKLEYNNSH-NVYIMA-----DKQKNG 161  
2EMN\_A | PDBID | CHAIN | SEQUENCE ILGHKLEYNNSH-NVYIMA-----DKQKNG 161  
1EMM\_A | PDBID | CHAIN | SEQUENCE ILGHKLEYNNSH-NVYIMA-----DKQKNG 161  
1EMC\_A | PDBID | CHAIN | SEQUENCE ILGHKLEYNNSH-NVYIMA-----DKQKNG 161  
1EML\_A | PDBID | CHAIN | SEQUENCE ILGHKLEYNNSH-NVYIMA-----DKQKNG 161  
1EME\_A | PDBID | CHAIN | SEQUENCE ILGHKLEYNNSH-NVYIMA-----DKQKNG 161  
1EMK\_A | PDBID | CHAIN | SEQUENCE ILGHKLEYNNSH-NVYIMA-----DKQKNG 161  
2WUR\_A | PDBID | CHAIN | SEQUENCE ILGHKLEYNNSH-NVYIMA-----DKQKNG 160  
1GFL\_A | PDBID | CHAIN | SEQUENCE ILGHKLEYNNSH-NVYIMA-----DKQKNG 160  
1RM9\_A | PDBID | CHAIN | SEQUENCE ILGHKLEYNNSH-NVYITA-----DKQKNG 160  
2WSN\_A | PDBID | CHAIN | SEQUENCE ILGHKLEYNNSH-NVYITA-----DKQKNG 161  
2Q57\_A | PDBID | CHAIN | SEQUENCE ILGHKLEYNNSD-NVYITA-----DKQKNG 178  
2WSO\_A | PDBID | CHAIN | SEQUENCE ILGHKLEYNNSD-NVYITA-----DKQKNG 161  
1OXF\_A | PDBID | CHAIN | SEQUENCE ILGHKLEYNNSH-NVYITA-----DKQKNG 159  
1CV7\_A | PDBID | CHAIN | SEQUENCE ILGHKLEYNNSH-NVYITA-----DKQKNG 160  
3GEX\_A | PDBID | CHAIN | SEQUENCE ILGHKLEYNNSH-NVYITA-----DKQKNG 166  
10XD\_A | PDBID | CHAIN | SEQUENCE ILGHKLEYNNSH-NVYITA-----DKQKNG 160  
10XE\_A | PDBID | CHAIN | SEQUENCE ILGHKLEYNNSH-NVYITA-----DKQKNG 160  
3LVC\_A | PDBID | CHAIN | SEQUENCE ILGNKMEYNNAH-NVYITM-----DKAKNG 160  
3LVD\_A | PDBID | CHAIN | SEQUENCE ILGNKMEYNNAH-NVYITM-----DKAKNG 160  
3LVA\_A | PDBID | CHAIN | SEQUENCE ILGNKMEYNNAH-NVYITM-----DKAKNG 160  
2HPW\_A | PDBID | CHAIN | SEQUENCE ILGMRVLYHSPPH-AVYILP-----DRKNGG 161  
2WIQ\_A | PDBID | CHAIN | SEQUENCE IMRDQLVDIILPNE THMFPHG-----PNA 178  
3A85\_A | PDBID | CHAIN | SEQUENCE IMRDQLVDIILPNE THMFPHG-----PNA 159  
2WIS\_A | PDBID | CHAIN | SEQUENCE IMRDQLVDIILPNE THMFPHG-----PNA 178  
3GB3\_A | PDBID | CHAIN | SEQUENCE IMRDQLVDIILPNE THMFPHG-----PNA 156  
3GL4\_A | PDBID | CHAIN | SEQUENCE IMRDQLVDIILPNE THMFPHG-----PNA 156  
2A46\_A | PDBID | CHAIN | SEQUENCE VMAKKTGWDPSFEKMTVC-----DGI 169  
2A48\_A | PDBID | CHAIN | SEQUENCE VMAKKTGWDPSFEKMTVC-----DGI 169  
2A47\_A | PDBID | CHAIN | SEQUENCE VMAKKTGWDPSFEKMTVC-----DGI 169  
2ZMW\_A | PDBID | CHAIN | SEQUENCE IMQNSVDWEPSTEKITAS-----DGV 155  
2ZMU\_A | PDBID | CHAIN | SEQUENCE IMQNSVDWEPSTEKITAS-----DGV 155  
2Z06\_A | PDBID | CHAIN | SEQUENCE IAQNKTLGWEPSTEKMTVR-----DGS 182  
2Z07\_A | PDBID | CHAIN | SEQUENCE IMQNKTLGWEPSTEKMTVR-----DGS 155  
3B8X\_B | PDBID | CHAIN | SEQUENCE VMQKKTLGWEASTEMLYPA-----DGG 165  
3B8X\_A | PDBID | CHAIN | SEQUENCE VMQKKTLGWEASTEMLYPA-----DGG 165  
3B8B\_A | PDBID | CHAIN | SEQUENCE VMQKKTLGWEASTEMLYPA-----DGG 165  
3B8C\_A | PDBID | CHAIN | SEQUENCE VMQKKTLGWEASTEMLYPA-----DGG 165  
3H10\_A | PDBID | CHAIN | SEQUENCE VMQKKTLGWEASTEMLYPA-----DGG 153

Supplementary Material (ESI) for Molecular BioSystems  
This journal is (c) The Royal Society of Chemistry, 2011

|                                   |                                                        |
|-----------------------------------|--------------------------------------------------------|
| 3H1R_A   PDBID   CHAIN   SEQUENCE | VMQKKT LGWEAHTM LYP A-----DGG 153                      |
| 3M22_A   PDBID   CHAIN   SEQUENCE | VMQKKT LGWEANTE M LYP A-----DGG 157                    |
| 3M24_A   PDBID   CHAIN   SEQUENCE | VMQKKT LGWEAFTE T LYP A-----DGG 154                    |
| 3IP2_A   PDBID   CHAIN   SEQUENCE | VMQKKT LGWEASTE M LYP A-----DGG 157                    |
| 3E5T_A   PDBID   CHAIN   SEQUENCE | VMQKKT GWEPNTE M LYP A-----DGG 166                     |
| 3E5V_A   PDBID   CHAIN   SEQUENCE | VMQKKT GWEPSTE M LYP A-----DGG 166                     |
| 1UI5_B   PDBID   CHAIN   SEQUENCE | VMQKKT GWEPNTE M LYP A-----DGG 155                     |
| 3E5W_A   PDBID   CHAIN   SEQUENCE | VMQKKT GWEPSTE M LYP A-----DGG 166                     |
| 2A50_A   PDBID   CHAIN   SEQUENCE | VMQNKAGR WEPATE I VYEV-----DGV 164                     |
| 2A52_A   PDBID   CHAIN   SEQUENCE | VMQNKAGR WEPATE I VYEV-----DGV 164                     |
| 1XMZ_A   PDBID   CHAIN   SEQUENCE | VMQNKAGR WEPGTE I VYEV-----DGV 164                     |
| 2A54_C   PDBID   CHAIN   SEQUENCE | VMQNKAGR WEPSTE I VYEV-----DGV 164                     |
| 2A53_A   PDBID   CHAIN   SEQUENCE | VMQNKAGR WEPSTE I VYEV-----DGV 164                     |
| 2A56_A   PDBID   CHAIN   SEQUENCE | VMQNKAGR WEPSTE I VYEV-----DGV 164                     |
| 1XQM_A   PDBID   CHAIN   SEQUENCE | VMQNKVGR WEPGTE I VYEV-----DGV 153                     |
| 3CFH_L   PDBID   CHAIN   SEQUENCE | VMQNKAGG WEPGCE I LYEV-----DGV 153                     |
| 3CFH_S   PDBID   CHAIN   SEQUENCE | VMQNKAGG WEPGCE I LYEV-----DGV 153                     |
| 3CFA_L   PDBID   CHAIN   SEQUENCE | VMQNKAGG WEPGCE I LYEV-----DGV 153                     |
| 1Y2W_A   PDBID   CHAIN   SEQUENCE | VMQNKSGG WEPSTE V VYVE-----NGV 151                     |
| 2I85_A   PDBID   CHAIN   SEQUENCE | VMQKKTQG WEPCCEMRYTR-----DGV 156                       |
| 2I86_A   PDBID   CHAIN   SEQUENCE | VMQKKTQG WEPCCEMRYTR-----DGV 156                       |
| 2C9T_A   PDBID   CHAIN   SEQUENCE | VMQKKT CGWEPSTE I VYPR-----DGG 153                     |
| 1G7K_A   PDBID   CHAIN   SEQUENCE | VMQKKT MGWEASTE RLYPR-----DGV 167                      |
| 1ZG0_A   PDBID   CHAIN   SEQUENCE | VMQKKT MGWEASTE RLYPR-----DGV 156                      |
| 1G6X_A   PDBID   CHAIN   SEQUENCE | VMQKKT MGWEASTE RLYPR-----DGV 156                      |
| 1ZG0_H   PDBID   CHAIN   SEQUENCE | VMQKKT MGWEASTE RLYPR-----DGV 156                      |
| 1ZGP_A   PDBID   CHAIN   SEQUENCE | VMQKKT MGWEASTE RLYPR-----DGV 156                      |
| 2H80_A   PDBID   CHAIN   SEQUENCE | VMQKKT MGWEASTE RLYPR-----DGV 150                      |
| 2V4E_A   PDBID   CHAIN   SEQUENCE | VMQKKT MGWEPSTE RLYPR-----DGV 156                      |
| 2V4F_A   PDBID   CHAIN   SEQUENCE | VMQKKT MGWEPSTE RLYPR-----DGV 151                      |
| 2V4D_A   PDBID   CHAIN   SEQUENCE | VMQKKT AGWEPSTE KLYPQ-----DGV 156                      |
| 2H5P_A   PDBID   CHAIN   SEQUENCE | VMQKKT MGWEASER MYPE-----DGA 161                       |
| 2H5R_A   PDBID   CHAIN   SEQUENCE | VMQKKT MGWEASER MYPE-----DGA 161                       |
| 2H50_A   PDBID   CHAIN   SEQUENCE | VMQKKT MGWEASER MYPE-----DGA 161                       |
| 2QLG_A   PDBID   CHAIN   SEQUENCE | VMQKKT MGWEASER MYPE-----DGA 157                       |
| 2QLL_A   PDBID   CHAIN   SEQUENCE | VMQKKT MGWEASER MYPE-----DGA 157                       |
| 2QLH_A   PDBID   CHAIN   SEQUENCE | VMQKKT MGWEASER MYPE-----DGA 157                       |
| 2H50_A   PDBID   CHAIN   SEQUENCE | VMQKKT MGWEASER MYPE-----DGA 161                       |
| 3KCS_A   PDBID   CHAIN   SEQUENCE | VMQKKT MGWEALSER MYPE-----DGA 161                      |
| 3KCT_A   PDBID   CHAIN   SEQUENCE | VMQKKT MGWEALSER MYPE-----DGA 161                      |
| 3LF3_A   PDBID   CHAIN   SEQUENCE | VMQKKT MGWEASTER MYPE-----DGA 156                      |
| 3LF4_A   PDBID   CHAIN   SEQUENCE | VMQKKT MGWEASTER MYPE-----DGA 156                      |
| 2P4M_A   PDBID   CHAIN   SEQUENCE | VMQKKTQG WEPSSER L FAR-----GGM 152                     |
| 2ARL_A   PDBID   CHAIN   SEQUENCE | VMQKKTQG WEPSSER L FAR-----GGM 152                     |
| 1M0V_A   PDBID   CHAIN   SEQUENCE | VMQKKTQG WEPSSER L FAR-----GGM 152                     |
| 1M0U_A   PDBID   CHAIN   SEQUENCE | VMQKKTQG WEPSSER L FAR-----GGM 152                     |
| 2WH5_A   PDBID   CHAIN   SEQUENCE | VMQKKTQG WEPSTE R L FAR-----DGM 173                    |
| 2WHT_A   PDBID   CHAIN   SEQUENCE | VMQKKTQG WEPSTE R L FAR-----DGM 173                    |
| 2WHU_A   PDBID   CHAIN   SEQUENCE | VMQKKTQG WEPSTE R L FAR-----DGM 173                    |
| 3IR8_A   PDBID   CHAIN   SEQUENCE | VMQKKTQG WEPSTE R L FAR-----DGM 154                    |
| 3CGL_A   PDBID   CHAIN   SEQUENCE | VVQKKT TGWEPSTE RLYPR-----DGV 167                      |
| 2Z6Z_A   PDBID   CHAIN   SEQUENCE | VMQKRTVK WEPSTE KLYVR-----DGV 185                      |
| 2I0V_A   PDBID   CHAIN   SEQUENCE | VMQKRTVK WEPSTE KLYVR-----DGV 185                      |
| 2POX_A   PDBID   CHAIN   SEQUENCE | VMQKRTVK WEPSTE KLYVR-----DGV 185                      |
| 2IEZ_A   PDBID   CHAIN   SEQUENCE | VMQKRTVK WEPSTE KLYVR-----DGV 152                      |
| 2Z10_A   PDBID   CHAIN   SEQUENCE | VMQKRTVK WEPSTE KLYVR-----DGV 155                      |
| 2Z6Y_A   PDBID   CHAIN   SEQUENCE | VMQKRTVK WEPSTE KLYVR-----DGV 155                      |
| 2GZ2_A   PDBID   CHAIN   SEQUENCE | VMQKRTVK WEPSTE KLYVR-----DGV 171                      |
| 2GX0_B   PDBID   CHAIN   SEQUENCE | VMQKRTVK WEPSTE KLYVR-----DGV 171                      |
| 2Z6X_A   PDBID   CHAIN   SEQUENCE | VMQKRTVK WEPSTE KLYVR-----DGV 185                      |
| 3LS3_A   PDBID   CHAIN   SEQUENCE | VMQKRTVK WELSTE KLYVR-----DGV 165                      |
| 3LSA_A   PDBID   CHAIN   SEQUENCE | VMQKRTVK WELSTE KLYVR-----DGV 165                      |
| 2DDC_A   PDBID   CHAIN   SEQUENCE | VMQRKTVK WESSTE KMYVR-----DGV 155                      |
| 2DD0_A   PDBID   CHAIN   SEQUENCE | VMQRKTVK WESSTE KMYVR-----DGV 155                      |
| 1X55_A   PDBID   CHAIN   SEQUENCE | VMQRKTVK WEPSTE KMYVR-----DGV 155                      |
| 2VVI_A   PDBID   CHAIN   SEQUENCE | VMQKKT LK WEPSTE KMYVR-----DGV 154                     |
| 2VHL_A   PDBID   CHAIN   SEQUENCE | VMQKKT LK WEPSTE KMYVR-----DGV 154                     |
| 2VJ2_A   PDBID   CHAIN   SEQUENCE | VMQKKT LK WEPSTE KMYVR-----DGV 154                     |
| 1ZUX_A   PDBID   CHAIN   SEQUENCE | VMQKKT LK WEPSTE KMYVR-----DGV 152                     |
| 28TJ_A   PDBID   CHAIN   SEQUENCE | VMQKKT LK WEPSTE KMYVR-----DGV 152                     |
| 2GW3_A   PDBID   CHAIN   SEQUENCE | VMQKKT LK WEASTE KMYLR-----DGV 154                     |
| 2GW4_A   PDBID   CHAIN   SEQUENCE | VMQKKT LK WEASTE KMYLR-----DGV 154                     |
| 2OTE_A   PDBID   CHAIN   SEQUENCE | VMQKKT LK WEPSTE ILYVR-----DGV 151                     |
| 20TB_A   PDBID   CHAIN   SEQUENCE | VMQKKT LK WEPSTE ILYVR-----DGV 151                     |
| 2HQK_A   PDBID   CHAIN   SEQUENCE | VMQKKT TG WDASTE RMYVR-----DGV 151                     |
| 2VZX_A   PDBID   CHAIN   SEQUENCE | VMQKKT LK WEPSTE KLYVR-----DGL 152                     |
| 3ADF_A   PDBID   CHAIN   SEQUENCE | VMQKKT LK WEPSTE KMYVE-----DGV 155                     |
| 2ICR_A   PDBID   CHAIN   SEQUENCE | VNRKMTTN WEPSC EKIIPVPS-----GKI 168                    |
| 2FL1_A   PDBID   CHAIN   SEQUENCE | VNRKMTTN WEPSC EKIIPVPS-----GKI 157                    |
| 20GR_A   PDBID   CHAIN   SEQUENCE | VNRKMTTN WEA SCKEIMPVPK-----GKI 160                    |
| 1XAE_A   PDBID   CHAIN   SEQUENCE | VNRKMTTN WEA SCKEIMPVPK-----GKI 160                    |
| 1XAG_A   PDBID   CHAIN   SEQUENCE | VNRKMTTN WEA SCKEIMPVPK-----GKI 160                    |
| 2PXS_A   PDBID   CHAIN   SEQUENCE | VNRKMTDN WEPSC EKIIPVPS-----GKI 157                    |
| 2PXW_A   PDBID   CHAIN   SEQUENCE | VNRKMTDN WEPSC EKIIPVPS-----GKI 157                    |
| 20JK_A   PDBID   CHAIN   SEQUENCE | VNRKMTDN WEPSC EKIIPVPS-----GKI 160                    |
| 2RH7_A   PDBID   CHAIN   SEQUENCE | VMQDQIVGMQPSY ESMYTN-----VTS 156                       |
| 2C9J_H   PDBID   CHAIN   SEQUENCE | VMKNEI VME E PAEET L TAK-----NGV 152                   |
| 2G6X_A   PDBID   CHAIN   SEQUENCE | IFTDKI IRSNATVEHLHPMG-----DND 149                      |
| 2G6Y_A   PDBID   CHAIN   SEQUENCE | IFTDKI IRSNATVEHLHPMG-----DND 149                      |
| 2G30_A   PDBID   CHAIN   SEQUENCE | IFTDKI IRSNATVEHLHPMG-----DND 149                      |
| 2DD7_A   PDBID   CHAIN   SEQUENCE | IFKDTIVK SCPTVDLMLPMS-----GNI 146                      |
| 2DD9_D   PDBID   CHAIN   SEQUENCE | IFKDTIVK SCPTVDLMLPMS-----GNI 146                      |
| :                                 | :                                                      |
| 3EKJ_A   PDBID   CHAIN   SEQUENCE | GITTKQLGTVMRSLGQNPTEAELQDMIN---EVDADGNGTIDFPFLTMM 375  |
| 3EVP_A   PDBID   CHAIN   SEQUENCE | -----                                                  |
| 3EKH_A   PDBID   CHAIN   SEQUENCE | TIITKELGTVMRSLGQNPTEAELQDMIN---EVDADGNGTIDFPFLTMM 375  |
| 3EVR_A   PDBID   CHAIN   SEQUENCE | TIITKELGTVMRSLGQNPTEAELQDMIN---EVDADGNGTIDFPFLTMM 338  |
| 3EK7_A   PDBID   CHAIN   SEQUENCE | TIITKELGTVMRSLGQNPTEAELQDMIN---EVDADGNGTIDFPFLTMM 375  |
| 3EVL_A   PDBID   CHAIN   SEQUENCE | TIITKELGTVMRSLGQNPTEAELQDMIN---EVDADGNGTIDFPFLTMM 375  |
| 3EVL_A   PDBID   CHAIN   SEQUENCE | TIITKELGTVMRSLGQNPTEAELQDMIN---EVDADGNGTIDFPFLTMM 375  |
| 3EVA_A   PDBID   CHAIN   SEQUENCE | TIITKELGTVMRSLGQNPTEAELQDMIN---EVDADGNGTIDFPFLTMM 375  |
| 3EK4_A   PDBID   CHAIN   SEQUENCE | TIITKELGTVMRSLGQNPTEAELQDMIN---EVDADGNGTIDFPFLTMM 375  |
| 3EK8_A   PDBID   CHAIN   SEQUENCE | TIITKELGTVMRSLGQNPTEAELQDMIN---EVDADGNGTIDFPFLTMM 375  |
| 2G3D_A   PDBID   CHAIN   SEQUENCE | IKANFKIRHNIE-----DGSVQLADHYQ---QNTPIGDGPVLLPDNHYLS 203 |
| 2G2S_A   PDBID   CHAIN   SEQUENCE | IKANFKIRHNIE-----DGSVQLADHYQ---QNTPIGDGPVLLPDNHYLS 203 |









Supplementary Material (ESI) for Molecular BioSystems  
This journal is (c) The Royal Society of Chemistry, 2011

|         |                          |                                                      |     |
|---------|--------------------------|------------------------------------------------------|-----|
| 2A48_A1 | PDBID   CHAIN   SEQUENCE | HRIARTDLKGGN-SVQLTEH-----AVAHITSVVPF-----            | 240 |
| 2A47_A1 | PDBID   CHAIN   SEQUENCE | TRIARTDLKGGN-SVQLTEH-----AVAHITSVVPF-----            | 240 |
| 22M0_A1 | PDBID   CHAIN   SEQUENCE | HRLVLR---KTEGN-ITELVED-----AVAHSELEHHHHH-----        | 226 |
| 22M1_A1 | PDBID   CHAIN   SEQUENCE | HRLVLR---KTEGN-ITELVED-----AVAHSELEHHHHH-----        | 226 |
| 2206_A1 | PDBID   CHAIN   SEQUENCE | HR1SS---VWGT-KIQMED-----ATAHLYPFGVPCQ-----           | 254 |
| 2207_A1 | PDBID   CHAIN   SEQUENCE | HR1SS---VWGT-KIQMED-----ATAHLYPFGS-----              | 224 |
| 38X9_B1 | PDBID   CHAIN   SEQUENCE | RRLERIKEADKET-YVEQHEV-----AVARYCD-LPSKLGHLN-----     | 245 |
| 38X9_A1 | PDBID   CHAIN   SEQUENCE | RRLERIKEADKET-YVEQHEV-----AVARYCD-LPSKLGHLN-----     | 245 |
| 38X8_A1 | PDBID   CHAIN   SEQUENCE | RRLERIKEADKET-YVEQHEV-----AVARYCD-LPSKLGHLN-----     | 245 |
| 38X7_A1 | PDBID   CHAIN   SEQUENCE | RRLERIKEADKET-YVEQHEV-----AVARYCD-LPSKLGHLN-----     | 245 |
| 3H10_A1 | PDBID   CHAIN   SEQUENCE | YRLERIKEADKET-YVEQHEV-----AVARYCD-LPSKLGHLN-----     | 233 |
| 3H1R_A1 | PDBID   CHAIN   SEQUENCE | YRLERIKEADKET-YVEQHEV-----AVARYCD-LPSKLGHLN-----     | 233 |
| 3M22_A1 | PDBID   CHAIN   SEQUENCE | HLRERIKEADKET-YVEQHEV-----AVARYCD-LPSKLGHLN-----     | 237 |
| 3M24_A1 | PDBID   CHAIN   SEQUENCE | YRLERIKEANNET-YVEQHEV-----AVARYCD-LPSKLGHLN-----     | 234 |
| 3IP2_A1 | PDBID   CHAIN   SEQUENCE | RRLERIKEADNET-YVEQHEV-----AVARYCD-LPSKLGHLNGMDELY    | 243 |
| 3E5T_A1 | PDBID   CHAIN   SEQUENCE | HRLERLEESDKEM-FVQHEH-----AVAKFCD-LPSKLGRL-----       | 244 |
| 3E5V_A1 | PDBID   CHAIN   SEQUENCE | HRLERLEESDKEM-FVQHEH-----AVAKFCD-LPSKLGRL-----       | 244 |
| 1U1S_B1 | PDBID   CHAIN   SEQUENCE | HRLERLEESDKEM-FVQHEH-----AVAKFCD-LPSKLGRLGRL-----    | 237 |
| 3E5W_A1 | PDBID   CHAIN   SEQUENCE | HRLERLEESDKEM-FVQHEH-----AVAKFCD-LPSKLGRL-----       | 244 |
| 2A50_A1 | PDBID   CHAIN   SEQUENCE | HR1E1MEEVEKGG-CYKQYEA-----AVGRYCDAAAPSKLGHN-----     | 243 |
| 2A52_A1 | PDBID   CHAIN   SEQUENCE | HR1E1MEEVEKGG-CYKQYEA-----AVGRYCDAAAPSKLGHN-----     | 243 |
| 1XMZ_A1 | PDBID   CHAIN   SEQUENCE | HR1E1MEEVEKGG-CYKQYEA-----AVGRYCDAAAPSKLGHN-----     | 243 |
| 2A54_C1 | PDBID   CHAIN   SEQUENCE | HR1E1MEEVEKGG-CYKQYEA-----AVGRYCDAAAPSKLGHN-----     | 243 |
| 2A53_A1 | PDBID   CHAIN   SEQUENCE | HR1E1MEEVEKGG-CYKQYEA-----AVGRYCDAAAPSKLGHN-----     | 243 |
| 2A56_A1 | PDBID   CHAIN   SEQUENCE | HR1E1MEEVEKGG-CYKQYEA-----AVGRYCDAAAPSKLGHN-----     | 243 |
| 1XQX_A1 | PDBID   CHAIN   SEQUENCE | HR1E1MEEVEKGG-CYKQYEA-----AVGRYCDAAAPSKLGHN-----     | 232 |
| 3CFE_L1 | PDBID   CHAIN   SEQUENCE | HR1EVK-EVQGG-HYEQYEA-----AVARYCDAAAPSKLGH-----       | 231 |
| 3CFH_S1 | PDBID   CHAIN   SEQUENCE | HR1EVK-EVQGG-HYEQYEA-----AVARYCDAAAPSKLGH-----       | 231 |
| 3CFA_L1 | PDBID   CHAIN   SEQUENCE | HR1EVK-EVQGG-HYEQYEA-----AVARYCDAAAPSKLGH-----       | 231 |
| 1Z7W_A1 | PDBID   CHAIN   SEQUENCE | IRLQML-RKKKDE-YFELYEA-----SVARYSD-LPEKAN-----        | 225 |
| 2185_A1 | PDBID   CHAIN   SEQUENCE | HRPE1VKVSENGT-LFEQHE-----SVARYCQTCPKSLGH-----        | 235 |
| 2186_A1 | PDBID   CHAIN   SEQUENCE | HRPE1VKVSENGT-LFEQHE-----SVARYCQTCPKSLGH-----        | 235 |
| 2C91_A1 | PDBID   CHAIN   SEQUENCE | LRMEKLNISDDWK-TVEQHE-----VWASYSQ-VPSKLGHN-----       | 228 |
| 167K_A1 | PDBID   CHAIN   SEQUENCE | SKLDITSHNEDYT-IVEQYER-----TEGRHHLFL-----             | 226 |
| 1ZG0_A1 | PDBID   CHAIN   SEQUENCE | SKLDITSHNEDYT-IVEQYER-----TEGRHHLFL-----             | 225 |
| 16XA_A1 | PDBID   CHAIN   SEQUENCE | SKLDITSHNEDYT-IVEQYER-----TEGRHHLFL-----             | 225 |
| 1ZGQ_H1 | PDBID   CHAIN   SEQUENCE | SKLDITSHNEDYT-IVEQYER-----TEGRHHLFL-----             | 225 |
| 1ZGP_A1 | PDBID   CHAIN   SEQUENCE | SKLDITSHNEDYT-IVEQYER-----TEGRHHLFL-----             | 225 |
| 2H8Q_A1 | PDBID   CHAIN   SEQUENCE | SKLDITSHNEDYT-IVEQYER-----TEGRHHLFL-----             | 219 |
| 2VAE_A1 | PDBID   CHAIN   SEQUENCE | SKLDITSHNEDYT-IVEQYER-----AEGRHHLFL-----             | 225 |
| 2V4E_A1 | PDBID   CHAIN   SEQUENCE | SKLDITSHNEDYT-IVEQYER-----TEARHHLFL-----             | 220 |
| 2VAD_A1 | PDBID   CHAIN   SEQUENCE | SKLDITSHNEDYT-IVEQYER-----AEGRHSGSQ-----             | 225 |
| 2H5P_A1 | PDBID   CHAIN   SEQUENCE | IKLDITSHNEDYT-IVELYER-----AEGRHSTGMDELYK-----        | 236 |
| 2H5R_A1 | PDBID   CHAIN   SEQUENCE | IKLDITSHNEDYT-IVELYER-----AEGRHSTGMDELYK-----        | 236 |
| 2H5O_A1 | PDBID   CHAIN   SEQUENCE | IKLDITSHNEDYT-IVEQYER-----AEGRHSTGMDELYK-----        | 236 |
| 2QLG_A1 | PDBID   CHAIN   SEQUENCE | IKLDITSHNEDYT-IVEQYER-----AEGRHSTGA-----             | 226 |
| 2QLL_A1 | PDBID   CHAIN   SEQUENCE | IKLDITSHNEDYT-IVEQYER-----AEGRHSTGA-----             | 226 |
| 2QLH_A1 | PDBID   CHAIN   SEQUENCE | IKLDITSHNEDYT-IVEQYER-----AEGRHSTGA-----             | 226 |
| 2H5Q_A1 | PDBID   CHAIN   SEQUENCE | IKLDITSHNEDYT-IVEQYER-----AEGRHSTGMDELYK-----        | 236 |
| 3KCS_A1 | PDBID   CHAIN   SEQUENCE | RKLDITSHNEDYT-IVEQYER-----AEGRHSTGMDELYK-----        | 236 |
| 3KCT_A1 | PDBID   CHAIN   SEQUENCE | RKLDITSHNEDYT-IVEQYER-----AEGRHSTGMDELYK-----        | 236 |
| 3LF4_A1 | PDBID   CHAIN   SEQUENCE | IKLDITSHNEDYT-IVEQYER-----SEGRHSTGMDELYK-----        | 231 |
| 3LF3_A1 | PDBID   CHAIN   SEQUENCE | IKLDITSHNEDYT-IVEQYER-----AEGRHSTGMDELYK-----        | 231 |
| 2P4M_A1 | PDBID   CHAIN   SEQUENCE | RKLDVTHNKKDYT-SVEQCEI-----SIARKPVVA-----             | 221 |
| 2ARL_A1 | PDBID   CHAIN   SEQUENCE | RKLDVTHNKKDYT-SVEQCEI-----SIARKPVVA-----             | 221 |
| 1MOV_A1 | PDBID   CHAIN   SEQUENCE | RKLDVTHNKKDYT-SVEQCEI-----SIARKPVVA-----             | 221 |
| 1M0U_A1 | PDBID   CHAIN   SEQUENCE | RKLDVTHNKKDYT-SVEQCEI-----SIARKPVVA-----             | 221 |
| 2WH5_A1 | PDBID   CHAIN   SEQUENCE | RKLDVTHNKKDYT-SVEQCEI-----SIARKPVVA-----             | 221 |
| 2WHT_A1 | PDBID   CHAIN   SEQUENCE | RKLDVTHNKKDYT-SVEQCEI-----SIARKPVVA-----             | 221 |
| 2WHU_A1 | PDBID   CHAIN   SEQUENCE | RKLDVTHNKKDYT-SVEQCEI-----SIARKPVVA-----             | 221 |
| 31R8_A1 | PDBID   CHAIN   SEQUENCE | RKLDVTHNKKDYT-SVEQCEI-----SIARKPVVA-----             | 221 |
| 3CGL_A1 | PDBID   CHAIN   SEQUENCE | TKLVWVNNKDFM-KVEEHEI-----AVARHPFVPEPKDK-----         | 243 |
| 2262_A1 | PDBID   CHAIN   SEQUENCE | HHTEIKSHDKDY-SVNLHEH-----AEAS-ELPRAK-----            | 257 |
| 210V_A1 | PDBID   CHAIN   SEQUENCE | HHTEIKSHDKDY-SVNLHEH-----AEAS-ELPRAK-----            | 257 |
| 2P0X_A1 | PDBID   CHAIN   SEQUENCE | HHTEIKSHDKDY-SVNLHEH-----AEAS-ELPRAK-----            | 257 |
| 21E2_A1 | PDBID   CHAIN   SEQUENCE | HHTEIKSHDKDY-SVNLHEH-----AEAS-ELPRAK-----            | 224 |
| 2210_A1 | PDBID   CHAIN   SEQUENCE | HHTEIKSHDKDY-SVNLHEH-----AEAS-ELPRAK-----            | 227 |
| 226Y_A1 | PDBID   CHAIN   SEQUENCE | HHTEIKSHDKDY-SVNLHEH-----AEAS-ELPRAK-----            | 227 |
| 2GX2_A1 | PDBID   CHAIN   SEQUENCE | HHTEIKSHDKDY-SVNLHEH-----AEAS-ELPRAK-----            | 243 |
| 2GX0_B1 | PDBID   CHAIN   SEQUENCE | HHTEIKSHDKDY-SVNLHEH-----AEAS-ELPRAK-----            | 243 |
| 226X_A1 | PDBID   CHAIN   SEQUENCE | HHTEIKSHDKDY-SVNLHEH-----AEAS-ELPRAK-----            | 257 |
| 31S3_A1 | PDBID   CHAIN   SEQUENCE | HHTEIKSHDKDY-SVNLHEH-----AEAS-ELPRAK-----            | 237 |
| 31SA_A1 | PDBID   CHAIN   SEQUENCE | HHTEIKSHDKDY-SVNLHEH-----AEAS-ELPRAK-----            | 237 |
| 2DDC_A1 | PDBID   CHAIN   SEQUENCE | HLMETTSHDKDY-KVKLYEH-----AKAS-GLPRLAK-----           | 227 |
| 2DD0_A1 | PDBID   CHAIN   SEQUENCE | HLMETTSHDKDY-KVKLYEH-----AKAS-GLPRLAK-----           | 227 |
| 1X5S_A1 | PDBID   CHAIN   SEQUENCE | HR1ETTSHDKDY-KVKLYEH-----AKAS-GLPRLAK-----           | 227 |
| 2VVT_A1 | PDBID   CHAIN   SEQUENCE | HCTEILSHDKDY-KVKLYEH-----AVAS-GLPDNARR-----          | 228 |
| 2VWH_A1 | PDBID   CHAIN   SEQUENCE | HCTEILSHDKDY-KVKLYEH-----AVAS-GLPDNARR-----          | 228 |
| 2VJ3_A1 | PDBID   CHAIN   SEQUENCE | HCTEILSHDKDY-KVKLYEH-----AVAS-GLPDNARR-----          | 228 |
| 1ZUX_A1 | PDBID   CHAIN   SEQUENCE | HCTEILSHDKDY-KVKLYEH-----AVAS-GLPDNARR-----          | 226 |
| 2BT3_A1 | PDBID   CHAIN   SEQUENCE | HCTEILSHDKDY-KVKLYEH-----AVAS-GLPD-----              | 222 |
| 2GW3_A1 | PDBID   CHAIN   SEQUENCE | HCTEILSHDKDY-KVKLYEH-----AVAS-GLPDNARR-----          | 227 |
| 2G14_A1 | PDBID   CHAIN   SEQUENCE | HCTEILSHDKDY-KVKLYEH-----AVAS-GLPDNARR-----          | 227 |
| 20TE_A1 | PDBID   CHAIN   SEQUENCE | HR1EILNHDKDY-KVTVYES-----AVARY-----                  | 216 |
| 20TB_A1 | PDBID   CHAIN   SEQUENCE | HR1EILNHDKDY-KVTVYES-----AVARY-----                  | 216 |
| 2HQK_A1 | PDBID   CHAIN   SEQUENCE | HR1EILNHDKDY-KVTVYES-----AVARNSTDGM-----             | 221 |
| 2VZK_A1 | PDBID   CHAIN   SEQUENCE | HR1EILNHDKDY-KVKLYEH-----AVARYSPLPSQVHHHHHH-----     | 231 |
| 3ADF_A1 | PDBID   CHAIN   SEQUENCE | HR1EILNHDKDY-KVKLYEH-----AVARYSMLPSQAK-----          | 228 |
| 21CR_A1 | PDBID   CHAIN   SEQUENCE | HKLNREDRSDAKNKKWQLTEH-----AIASRSALP-----             | 239 |
| 2FL1_A1 | PDBID   CHAIN   SEQUENCE | HKLNREDRSDAKNKKWQLTEH-----AIASRSALP-----             | 228 |
| 20GR_A1 | PDBID   CHAIN   SEQUENCE | HKLNREDRSDAKNKKWQLTEH-----AIAPPSALA-----             | 231 |
| 1XAE_A1 | PDBID   CHAIN   SEQUENCE | HKLNREDRSDAKNKKWQLTEH-----AIAPPSALA-----             | 231 |
| 1XA9_A1 | PDBID   CHAIN   SEQUENCE | HKLNREDRSDAKNKKWQLTEH-----AIAPPSALA-----             | 231 |
| 2PX5_A1 | PDBID   CHAIN   SEQUENCE | HKLNREDRSDAKNKKWHLTEH-----AIASGSALP-----             | 228 |
| 2PXW_A1 | PDBID   CHAIN   SEQUENCE | HKLNREDRSDAKNKKWHLTEH-----AIASGSALP-----             | 228 |
| 20JK_A1 | PDBID   CHAIN   SEQUENCE | HKLNREDRSDAKNKKWHLTEH-----AIASGSALP-----             | 231 |
| 2RH7_A1 | PDBID   CHAIN   SEQUENCE | HRLVKTNTVDSAG-YVQHE-----ATAAHTIKKIEGSLPDVHHHHHH----- | 241 |
| 2C93_H1 | PDBID   CHAIN   SEQUENCE | HRLVKTNTVDSAG-YVQHE-----ATAHVCPLPKPN-----            | 225 |
| 2G6X_A1 | PDBID   CHAIN   SEQUENCE | RRVEEDHSNTELG-IVEYQH-----AFKTPD-----                 | 219 |
| 2G6Y_A1 | PDBID   CHAIN   SEQUENCE | RRVEEDHSNTELG-IVEYQH-----AFKTPD-----                 | 219 |
| 2G30_A1 | PDBID   CHAIN   SEQUENCE | RRVEELHSNTELG-IVEYQH-----AFKTPIAFA-----              | 222 |
| 2DD7_A1 | PDBID   CHAIN   SEQUENCE | RRVEETHKENLA--MVEYQ-----VFNSAPRDM-----               | 218 |
| 2DD9_D1 | PDBID   CHAIN   SEQUENCE | RRVEETHKENLA--MVEYQ-----VFNSAPRDM-----               | 218 |

3EKJ\_A | PDBID | CHAIN | SEQUENCE EMIREAGIDGGQVNYEEFVQMTAK 451  
-----  
3EVP\_A | PDBID | CHAIN | SEQUENCE EMIREADIDGGQVNYEEFVQMTAK 451  
3EKH\_A | PDBID | CHAIN | SEQUENCE EMIREADIDGGQVNYEEFVQMTAK- 413  
3EVR\_A | PDBID | CHAIN | SEQUENCE EMIREADIDGGQVNYEEFVQMTAK 451  
3EK7\_A | PDBID | CHAIN | SEQUENCE EMIREADIDGGQVNYEEFVQMTAK 451  
3EVL\_A | PDBID | CHAIN | SEQUENCE EMIREADIDGGQVNYEEFVQMTAK 451  
3EVL\_A | PDBID | CHAIN | SEQUENCE EMIREADIDGGQVNYEEFVQMTAK 451  
3EVA\_A | PDBID | CHAIN | SEQUENCE EMIREADIDGGQVNYEEFVQMTAK 451  
3EK4\_A | PDBID | CHAIN | SEQUENCE EMIREADIDGGQVNYEEFVQMTAK 451  
3EK8\_A | PDBID | CHAIN | SEQUENCE EMIREADIDGGQVNYEEFVQMTAK 451  
-----  
2G3D\_A | PDBID | CHAIN | SEQUENCE -----  
2G2S\_A | PDBID | CHAIN | SEQUENCE -----  
1QYQ\_A | PDBID | CHAIN | SEQUENCE -----  
2G6E\_A | PDBID | CHAIN | SEQUENCE -----  
1YHH\_A | PDBID | CHAIN | SEQUENCE -----  
1YHG\_B | PDBID | CHAIN | SEQUENCE -----  
2G5Z\_A | PDBID | CHAIN | SEQUENCE -----  
2G16\_A | PDBID | CHAIN | SEQUENCE -----  
2HGD\_A | PDBID | CHAIN | SEQUENCE -----  
2HGY\_A | PDBID | CHAIN | SEQUENCE -----  
1YJF\_A | PDBID | CHAIN | SEQUENCE -----  
1YHI\_A | PDBID | CHAIN | SEQUENCE -----  
1YJZ\_A | PDBID | CHAIN | SEQUENCE -----  
1QYF\_A | PDBID | CHAIN | SEQUENCE -----  
1QXT\_A | PDBID | CHAIN | SEQUENCE -----  
2AWM\_A | PDBID | CHAIN | SEQUENCE -----  
2AWK\_A | PDBID | CHAIN | SEQUENCE -----  
2AWJ\_A | PDBID | CHAIN | SEQUENCE -----  
2AWL\_A | PDBID | CHAIN | SEQUENCE -----  
2HFC\_A | PDBID | CHAIN | SEQUENCE -----  
2HCG\_A | PDBID | CHAIN | SEQUENCE -----  
2QZB\_A | PDBID | CHAIN | SEQUENCE -----  
2FZU\_A | PDBID | CHAIN | SEQUENCE -----  
1K1R\_A | PDBID | CHAIN | SEQUENCE -----  
1K1P\_A | PDBID | CHAIN | SEQUENCE -----  
1K1S\_A | PDBID | CHAIN | SEQUENCE -----  
2FWQ\_A | PDBID | CHAIN | SEQUENCE -----  
1B9C\_D | PDBID | CHAIN | SEQUENCE -----  
1MW\_A | PDBID | CHAIN | SEQUENCE -----  
3ED8\_A | PDBID | CHAIN | SEQUENCE -----  
1QY0\_A | PDBID | CHAIN | SEQUENCE -----  
2QU1\_A | PDBID | CHAIN | SEQUENCE -----  
1QY3\_A | PDBID | CHAIN | SEQUENCE -----  
2QTZ\_A | PDBID | CHAIN | SEQUENCE -----  
2QRF\_A | PDBID | CHAIN | SEQUENCE -----  
2HRS\_A | PDBID | CHAIN | SEQUENCE -----  
2B3Q\_D | PDBID | CHAIN | SEQUENCE -----  
2B3P\_A | PDBID | CHAIN | SEQUENCE -----  
1KPS\_A | PDBID | CHAIN | SEQUENCE -----  
3G1L\_A | PDBID | CHAIN | SEQUENCE -----  
3GJZ\_A | PDBID | CHAIN | SEQUENCE -----  
3G9A\_A | PDBID | CHAIN | SEQUENCE -----  
3K1K\_B | PDBID | CHAIN | SEQUENCE -----  
1JCO\_A | PDBID | CHAIN | SEQUENCE -----  
1JCL\_A | PDBID | CHAIN | SEQUENCE -----  
2A8B\_B | PDBID | CHAIN | SEQUENCE -----  
2AHA\_A | PDBID | CHAIN | SEQUENCE -----  
3CD1\_A | PDBID | CHAIN | SEQUENCE -----  
3CD9\_A | PDBID | CHAIN | SEQUENCE -----  
3CB9\_A | PDBID | CHAIN | SEQUENCE -----  
3CBE\_A | PDBID | CHAIN | SEQUENCE -----  
2OKW\_F | PDBID | CHAIN | SEQUENCE -----  
2OKY\_B | PDBID | CHAIN | SEQUENCE -----  
2HOZ\_A | PDBID | CHAIN | SEQUENCE -----  
2HJO\_A | PDBID | CHAIN | SEQUENCE -----  
2O2B\_A | PDBID | CHAIN | SEQUENCE -----  
2H9W\_A | PDBID | CHAIN | SEQUENCE -----  
2O24\_A | PDBID | CHAIN | SEQUENCE -----  
2O29\_A | PDBID | CHAIN | SEQUENCE -----  
2H6V\_A | PDBID | CHAIN | SEQUENCE -----  
1RMO\_A | PDBID | CHAIN | SEQUENCE -----  
1RMM\_A | PDBID | CHAIN | SEQUENCE -----  
1RMP\_A | PDBID | CHAIN | SEQUENCE -----  
1RRX\_A | PDBID | CHAIN | SEQUENCE -----  
2Q6P\_A | PDBID | CHAIN | SEQUENCE -----  
1Z1Q\_A | PDBID | CHAIN | SEQUENCE -----  
1S6Z\_A | PDBID | CHAIN | SEQUENCE -----  
1Z1P\_A | PDBID | CHAIN | SEQUENCE -----  
1F0B\_A | PDBID | CHAIN | SEQUENCE -----  
1F09\_A | PDBID | CHAIN | SEQUENCE -----  
2YFP\_A | PDBID | CHAIN | SEQUENCE -----  
3D08\_A | PDBID | CHAIN | SEQUENCE -----  
3DQ1\_A | PDBID | CHAIN | SEQUENCE -----  
3DQ9\_A | PDBID | CHAIN | SEQUENCE -----  
3DQA\_A | PDBID | CHAIN | SEQUENCE -----  
3DQC\_A | PDBID | CHAIN | SEQUENCE -----  
3DQD\_A | PDBID | CHAIN | SEQUENCE -----  
3DQE\_A | PDBID | CHAIN | SEQUENCE -----  
3DQF\_A | PDBID | CHAIN | SEQUENCE -----  
3DQH\_A | PDBID | CHAIN | SEQUENCE -----  
3DQI\_A | PDBID | CHAIN | SEQUENCE -----  
3DQJ\_A | PDBID | CHAIN | SEQUENCE -----  
3DQK\_A | PDBID | CHAIN | SEQUENCE -----  
3DQL\_A | PDBID | CHAIN | SEQUENCE -----  
3DQM\_A | PDBID | CHAIN | SEQUENCE -----  
3DQN\_A | PDBID | CHAIN | SEQUENCE -----  
3DQO\_A | PDBID | CHAIN | SEQUENCE -----  
3DQU\_A | PDBID | CHAIN | SEQUENCE -----  
3DQ4\_A | PDBID | CHAIN | SEQUENCE -----  
3DQ5\_A | PDBID | CHAIN | SEQUENCE -----  
3DQ6\_A | PDBID | CHAIN | SEQUENCE -----  
3DQ7\_A | PDBID | CHAIN | SEQUENCE -----  
3DPW\_A | PDBID | CHAIN | SEQUENCE -----  
3DPX\_A | PDBID | CHAIN | SEQUENCE -----  
3DPZ\_A | PDBID | CHAIN | SEQUENCE -----  
3DQ2\_A | PDBID | CHAIN | SEQUENCE -----



3DQ3\_A | PDBID | CHAIN | SEQUENCE -----  
1HU7\_A | PDBID | CHAIN | SEQUENCE -----  
1YFP\_A | PDBID | CHAIN | SEQUENCE -----  
2JAD\_A | PDBID | CHAIN | SEQUENCE -----  
1H6R\_A | PDBID | CHAIN | SEQUENCE -----  
1C4F\_A | PDBID | CHAIN | SEQUENCE -----  
1EMB\_A | PDBID | CHAIN | SEQUENCE -----  
1Q4A\_A | PDBID | CHAIN | SEQUENCE -----  
1EMA\_A | PDBID | CHAIN | SEQUENCE -----  
1Q4B\_A | PDBID | CHAIN | SEQUENCE -----  
1EMG\_A | PDBID | CHAIN | SEQUENCE -----  
2DUF\_A | PDBID | CHAIN | SEQUENCE -----  
2DUJ\_A | PDBID | CHAIN | SEQUENCE -----  
2DUJ\_A | PDBID | CHAIN | SEQUENCE -----  
2DUG\_A | PDBID | CHAIN | SEQUENCE -----  
2DUH\_A | PDBID | CHAIN | SEQUENCE -----  
1Q4E\_A | PDBID | CHAIN | SEQUENCE -----  
1Q73\_A | PDBID | CHAIN | SEQUENCE -----  
1Q4D\_A | PDBID | CHAIN | SEQUENCE -----  
1Q4C\_A | PDBID | CHAIN | SEQUENCE -----  
1J8Z\_A | PDBID | CHAIN | SEQUENCE -----  
1JBY\_A | PDBID | CHAIN | SEQUENCE -----  
1W75\_D | PDBID | CHAIN | SEQUENCE -----  
1W7U\_D | PDBID | CHAIN | SEQUENCE -----  
1W7T\_D | PDBID | CHAIN | SEQUENCE -----  
1HCJ\_A | PDBID | CHAIN | SEQUENCE -----  
2QLE\_A | PDBID | CHAIN | SEQUENCE -----  
1BFP\_A | PDBID | CHAIN | SEQUENCE -----  
2EMQ\_A | PDBID | CHAIN | SEQUENCE -----  
1EMF\_A | PDBID | CHAIN | SEQUENCE -----  
2EMD\_A | PDBID | CHAIN | SEQUENCE -----  
2EMN\_A | PDBID | CHAIN | SEQUENCE -----  
1EMM\_A | PDBID | CHAIN | SEQUENCE -----  
1EMC\_A | PDBID | CHAIN | SEQUENCE -----  
1EML\_A | PDBID | CHAIN | SEQUENCE -----  
1EME\_A | PDBID | CHAIN | SEQUENCE -----  
1EMK\_A | PDBID | CHAIN | SEQUENCE -----  
2WUR\_A | PDBID | CHAIN | SEQUENCE -----  
1GFL\_A | PDBID | CHAIN | SEQUENCE -----  
1RM9\_A | PDBID | CHAIN | SEQUENCE -----  
2WSN\_A | PDBID | CHAIN | SEQUENCE -----  
2Q57\_A | PDBID | CHAIN | SEQUENCE -----  
2WSO\_A | PDBID | CHAIN | SEQUENCE -----  
1OXF\_A | PDBID | CHAIN | SEQUENCE -----  
1CV7\_A | PDBID | CHAIN | SEQUENCE -----  
3GEX\_A | PDBID | CHAIN | SEQUENCE -----  
1OXD\_A | PDBID | CHAIN | SEQUENCE -----  
1OXE\_A | PDBID | CHAIN | SEQUENCE -----  
3LVC\_A | PDBID | CHAIN | SEQUENCE -----  
3LVD\_A | PDBID | CHAIN | SEQUENCE -----  
3LVA\_A | PDBID | CHAIN | SEQUENCE -----  
2HPW\_A | PDBID | CHAIN | SEQUENCE -----  
2W1Q\_A | PDBID | CHAIN | SEQUENCE -----  
3A8S\_A | PDBID | CHAIN | SEQUENCE -----  
2W1S\_A | PDBID | CHAIN | SEQUENCE -----  
3GB3\_A | PDBID | CHAIN | SEQUENCE -----  
3GL4\_A | PDBID | CHAIN | SEQUENCE -----  
2A46\_A | PDBID | CHAIN | SEQUENCE -----  
2A48\_A | PDBID | CHAIN | SEQUENCE -----  
2A47\_A | PDBID | CHAIN | SEQUENCE -----  
2ZMW\_A | PDBID | CHAIN | SEQUENCE -----  
2ZML\_A | PDBID | CHAIN | SEQUENCE -----  
2Z06\_A | PDBID | CHAIN | SEQUENCE -----  
2Z07\_A | PDBID | CHAIN | SEQUENCE -----  
3BX9\_B | PDBID | CHAIN | SEQUENCE -----  
3BXA\_A | PDBID | CHAIN | SEQUENCE -----  
3BXB\_A | PDBID | CHAIN | SEQUENCE -----  
3BXC\_A | PDBID | CHAIN | SEQUENCE -----  
3H1O\_A | PDBID | CHAIN | SEQUENCE -----  
3H1R\_A | PDBID | CHAIN | SEQUENCE -----  
3M22\_A | PDBID | CHAIN | SEQUENCE -----  
3M24\_A | PDBID | CHAIN | SEQUENCE -----  
3IP2\_A | PDBID | CHAIN | SEQUENCE -----  
3EST\_A | PDBID | CHAIN | SEQUENCE -----  
3ESV\_A | PDBID | CHAIN | SEQUENCE -----  
1UIS\_B | PDBID | CHAIN | SEQUENCE -----  
3E5W\_A | PDBID | CHAIN | SEQUENCE -----  
2A50\_A | PDBID | CHAIN | SEQUENCE -----  
2A52\_A | PDBID | CHAIN | SEQUENCE -----  
1XMZ\_A | PDBID | CHAIN | SEQUENCE -----  
2A54\_C | PDBID | CHAIN | SEQUENCE -----  
2A53\_A | PDBID | CHAIN | SEQUENCE -----  
2A56\_A | PDBID | CHAIN | SEQUENCE -----  
1XQM\_A | PDBID | CHAIN | SEQUENCE -----  
3CFE\_L | PDBID | CHAIN | SEQUENCE -----  
3CFH\_S | PDBID | CHAIN | SEQUENCE -----  
3CFA\_L | PDBID | CHAIN | SEQUENCE -----  
1YZW\_A | PDBID | CHAIN | SEQUENCE -----  
2IB5\_A | PDBID | CHAIN | SEQUENCE -----  
2IB6\_A | PDBID | CHAIN | SEQUENCE -----  
2C9T\_A | PDBID | CHAIN | SEQUENCE -----  
1G7K\_A | PDBID | CHAIN | SEQUENCE -----  
1ZG0\_A | PDBID | CHAIN | SEQUENCE -----  
1GGX\_A | PDBID | CHAIN | SEQUENCE -----  
1ZGQ\_H | PDBID | CHAIN | SEQUENCE -----  
1ZGP\_A | PDBID | CHAIN | SEQUENCE -----  
2HRQ\_A | PDBID | CHAIN | SEQUENCE -----  
2VAE\_A | PDBID | CHAIN | SEQUENCE -----  
2V4E\_A | PDBID | CHAIN | SEQUENCE -----  
2VAD\_A | PDBID | CHAIN | SEQUENCE -----  
2H5P\_A | PDBID | CHAIN | SEQUENCE -----  
2H5R\_A | PDBID | CHAIN | SEQUENCE -----  
2H5O\_A | PDBID | CHAIN | SEQUENCE -----  
2QLG\_A | PDBID | CHAIN | SEQUENCE -----  
2QLL\_A | PDBID | CHAIN | SEQUENCE -----

2QLH\_A | PDBID | CHAIN | SEQUENCE -----  
2H5Q\_A | PDBID | CHAIN | SEQUENCE -----  
3KCS\_A | PDBID | CHAIN | SEQUENCE -----  
3KCT\_A | PDBID | CHAIN | SEQUENCE -----  
3LF3\_A | PDBID | CHAIN | SEQUENCE -----  
3LF4\_A | PDBID | CHAIN | SEQUENCE -----  
2P4M\_A | PDBID | CHAIN | SEQUENCE -----  
2ARL\_A | PDBID | CHAIN | SEQUENCE -----  
1MOV\_A | PDBID | CHAIN | SEQUENCE -----  
1MOL\_A | PDBID | CHAIN | SEQUENCE -----  
2WHS\_A | PDBID | CHAIN | SEQUENCE -----  
2WHT\_A | PDBID | CHAIN | SEQUENCE -----  
2WHU\_A | PDBID | CHAIN | SEQUENCE -----  
3IR8\_A | PDBID | CHAIN | SEQUENCE -----  
3CGL\_A | PDBID | CHAIN | SEQUENCE -----  
2Z6Z\_A | PDBID | CHAIN | SEQUENCE -----  
2TOV\_A | PDBID | CHAIN | SEQUENCE -----  
2POX\_A | PDBID | CHAIN | SEQUENCE -----  
2IE2\_A | PDBID | CHAIN | SEQUENCE -----  
2Z1O\_A | PDBID | CHAIN | SEQUENCE -----  
2Z6Y\_A | PDBID | CHAIN | SEQUENCE -----  
2GXZ\_A | PDBID | CHAIN | SEQUENCE -----  
2GX8\_B | PDBID | CHAIN | SEQUENCE -----  
2Z6X\_A | PDBID | CHAIN | SEQUENCE -----  
3LS3\_A | PDBID | CHAIN | SEQUENCE -----  
3LSA\_A | PDBID | CHAIN | SEQUENCE -----  
2DDC\_A | PDBID | CHAIN | SEQUENCE -----  
2DDD\_A | PDBID | CHAIN | SEQUENCE -----  
1XSS\_A | PDBID | CHAIN | SEQUENCE -----  
2VVT\_A | PDBID | CHAIN | SEQUENCE -----  
2VVH\_A | PDBID | CHAIN | SEQUENCE -----  
2VVJ\_A | PDBID | CHAIN | SEQUENCE -----  
1ZUK\_A | PDBID | CHAIN | SEQUENCE -----  
2BTJ\_A | PDBID | CHAIN | SEQUENCE -----  
2GW3\_A | PDBID | CHAIN | SEQUENCE -----  
2GW4\_A | PDBID | CHAIN | SEQUENCE -----  
2OTE\_A | PDBID | CHAIN | SEQUENCE -----  
2OTB\_A | PDBID | CHAIN | SEQUENCE -----  
2HQK\_A | PDBID | CHAIN | SEQUENCE -----  
2VZX\_A | PDBID | CHAIN | SEQUENCE -----  
3ADF\_A | PDBID | CHAIN | SEQUENCE -----  
2ICR\_A | PDBID | CHAIN | SEQUENCE -----  
2FL1\_A | PDBID | CHAIN | SEQUENCE -----  
2OGR\_A | PDBID | CHAIN | SEQUENCE -----  
1XAE\_A | PDBID | CHAIN | SEQUENCE -----  
1XA9\_A | PDBID | CHAIN | SEQUENCE -----  
2PXS\_A | PDBID | CHAIN | SEQUENCE -----  
2PXW\_A | PDBID | CHAIN | SEQUENCE -----  
2OJK\_A | PDBID | CHAIN | SEQUENCE -----  
2RH7\_A | PDBID | CHAIN | SEQUENCE -----  
2C9J\_H | PDBID | CHAIN | SEQUENCE -----  
2G6X\_A | PDBID | CHAIN | SEQUENCE -----  
2G6Y\_A | PDBID | CHAIN | SEQUENCE -----  
2G3O\_A | PDBID | CHAIN | SEQUENCE -----  
2DD7\_A | PDBID | CHAIN | SEQUENCE -----  
2DD9\_D | PDBID | CHAIN | SEQUENCE -----



Supplementary Material (ESI) for Molecular BioSystems  
This journal is (c) The Royal Society of Chemistry, 2011

CLUSTAL 2.0.12 multiple sequence alignment

```
Q17106/5-229      --EELFTGVVPIILVELDGDVNGQKFSVRGEGEDATYGLTLKFICTTG----KLVPWPW 54
Q17105/5-229      --EELFTGVVPIILVELDGDVNGQKFSVSGEGEDATYGLTLNFICTTG----KLVPWPW 54
P42212/5-229      --EELFTGVVPIILVELDGDVNGHKFSVSGEGEDATYGLTLKFICTTG----KLVPWPW 54
Q6YG20/5-229      --AELFTGVVPIILVELDGDVNGHKFSVSGEGEDATYGLTLKFICTTG----KLVPWPW 54
Q8WTC5/5-229      --EELFTGVVPIILVELDGDVHGHKFSVRGEGEDADYGLKLEIKFICTTG----KLVPWPW 54
Q8WTC4/5-229      --EELFTGVVPIILVELDGDVHGHKFSVRGEGEDADYGLKLEIKFICTTG----KLVPWPW 54
Q8WTC9/5-229      --EELFTGIVPVLIELDGDVHGHKFSVRGEGEDADYGLKLEIKFICTTG----KLVPWPW 54
Q8WTD0/5-229      --EELFTGIVPVLIELDGDVHGHKFSVRGEGEDADYGLKLEIKFICTTG----KLVPWPW 54
Q8WTC8/5-229      --EELFTGIVPVLIELDGDVHGHKFSVRGEGEDADYGLKLEIKFICTTG----KLVPWPW 54
Q8WTC6/5-229      --EELFTGIVPVLIELDGDVHGHKFSVRGEGEDADYGLKLEIKFICTTG----KLVPWPW 54
Q8WP95/5-229      --EELFTGIVPVLIELDGDVHGHKFSVRGEGEDADYGLKLEIKFICTTG----KLVPWPW 54
Q8WTC7/5-229      --EELFTGIVPVLIELDGDVHGHKFSVRGEGEDADYGLKLEIKFICTTG----KLVPWPW 54
Q6RYS7/5-229      --ALLFHGKIPYVVEGMEGNDVGHFTFIRGKYGDASVGVKVDQFICTTG----DVPVPS 54
Q6RYS6/39-258     --TETFQKLPYKLELDGDVGGQTFKVIKGEVGDATGVIEGKYVCTEG----EVPISWV 54
Q6RYS5/2-222      --AEYFEKLPYKVELEGDVGGQTFKVIKGEVGDASTGRVEGKYVCTEG----EVPISWV 54
Q6RYS4/5-225      --PALFQSDMTFKIFIDGVVNDQKFTIADGSSKFPHGDFNVHVCETG----KLPSMWK 54
Q2TCH5/5-225      --PALFQSDMTFKIFIDGVEVNGQKFTIADGSSKFPHGDFNVHVCETG----KLPSMWK 54
Q53UG7/1-221      --MSVITSEMKLRLMEGAVNGHKFVITGKGSQPFEGIQN--MDLTVIE--GGPLPFAFD 55
Q53UG8/1-221      --MSVITSEMKIQLRMEGAVNGHKFVITGKGSQPFEGIQN--VDLTVIE--GGPLPFAFD 55
Q8MU48/1-218      --MSMIKPEMKIKMRMDGAVNGHKFVITGEGSGEPFEGKQT--MNLTVID--GGPLPFAFD 55
A8CLW1/1-218      --MNVIKPDMKIKLRMEGAVNGHKFAIEGEGNGQPFEGKQT--MNLKVKE--GGPLPFAFD 55
B6CT24/1-218      --MSVIKPDMKIKLRMEGAVNGHKFAIEGEGKQPFEGKQT--MNLKVKE--GGPLPFAFD 55
Q5TLG6/1-218      --MSVIKPDMKIKLRMEGAVNGHKFAIEGVGLGKPFEGKQS--MDLKVKE--GGPLPFAFD 55
A8CLQ1/1-223      --MSVINPDMKIKLYMEGAVNGHKFIEKGEKNGKPFEGKQT--MDLAVVD--GGPLPFAFD 55
Q2LI65/1-219      --MSAIKPDMLIKLRMEGAVNGHTFEIEGEGKGFEGKQK--MDLKVVD--GGPLPFAFD 55
A8CLW4/1-222      --MNVIKPDMKIKLRMEGAVNGHKFVITGKGSQPFEGIQN--MDLTVIE--GGPLPFAFD 55
B6CT25/4-224      --EDVIKRDMLIKLRMEGAVNGHKFVITGEGSGEPFEGKQT--IDLEVIE--GAPLPFAFD 55
A3F207/1-221      --MSVIKPMNVLKRLIEGAVNGHFPVIEGKNGHPPFEGTQD--IKLTVKE--GGPLPFAFD 55
Q962P9/1-221      --MSVIKPDMKIKLRMEGAVNGHKFVIEGDKGKPFEGTQS--MDLTVKE--GAPLPFAFD 55
Q7Z0W8/1-221      --MSVIKPDMKIKLRMEGAVNGHKFVIEGDKGKPFEGTQS--MDLTVKE--GAPLPFAFD 55
Q66ND5/1-221      --MSVIKPDMKIKLRMEGAVNGHKFVIEGDKGKPFEGKQT--MDLTVIE--GAPLPFAFD 55
Q66ND4/1-221      --MSVIKPDMKIKLRMEGAVNGHKFVIEGDKGKPFEGKQT--MDLTVIE--GAPLPFAFD 55
Q66ND2/1-221      --MSVIKPDMKIKLRMEGAVNGHKFVIEGDKGKPFEGKQT--MDLTVIE--GAPLPFAFD 55
A7UAL7/1-221      --MSVIKPDMKIKLRMEGAVNGHKFVIEGDKGKPFEGKQT--MDLTVIE--GAPLPFAFD 55
Q7Z0W6/1-221      --MSVIKPDMKIKLRMEGAVNGHKFVIEGDKGKPFEGKQT--MDLTVIE--GAPLPFAFD 55
A7UAL9/1-221      --MSVIKPDMKIKLRMEGAVNGHKFVIEGDKGKPFEGKQT--MDLTVIE--GAPLPFAFD 55
Q8T5F2/8-228      --KGVIKPDMKIKLRMEGAVNGHKFVIEGDKGKPFEGTQT--MDLTVIE--GAPLPFAFD 55
Q7Z0W7/8-228      --KGVIKPDMKIKLRMEGAVNGHKFVIEGDKGKPFEGTQT--MDLTVIE--GAPLPFAFD 55
Q8MU47/8-228      --KGVIKPDMKIKLRMEGAVNGHKFVIEGDKGKPFEGTQT--MDLTVIE--GAPLPFAFD 55
Q95VT0/1-221      --MSVIKPDMKIKLRMEGAVNGHKFVIEGDKGKPFEGTQS--MDLTVIE--GAPLPFAFD 55
A7UAL3/1-221      --MSVIKTDMLIKLRMEGAVNGHKFVIEGEGKPFEGKQT--MDLTVIE--GAPLPFAFD 55
A7UAL6/1-218      --MSVIKTDMLIKLRMEGAVNGHKFVIEGEGKPFEGKQT--MDLTVIE--GAPLPFAFD 55
A7UAL8/1-218      --MSVIKPDMKIKLRMEGAVNGHKFVIEGDKGKPFEGKQT--MDLTVIE--GAPLPFAFD 55
A8CL52/1-219      --MSLINPEMKIKLLMEGAVNGHFPVIEGDKGHPFEGKQS--MDLVKE--GAPLPFAFD 55
Q8I6J8/1-219      --MSLIKPEMKIKLLMEGAVNGHQPVEIEGDKGHPFEGKQS--MDLVKE--GAPLPFAFD 55
A3F208/1-219      --MSVIKEMKIKLRMEGAVNGHAFVIEGNGNHPFEGKQS--MDLEVKE--GAPLPFAFD 55
A8CLR7/1-219      --MSVIKPDMKIKLRMEGAVNGHGFVIEGDKGRPFEGKQS--MDLVKE--GGPLPFAFD 55
Q5S6Z9/1-219      --MSAIKPDMLIKLRMEGAVNGHGFVIEGDKGKPFEGKQS--MDLEVKE--GGPLPFAFD 55
Q66PW1/5-223      --KTVVQFMKIKMSLEGTVNGHYFKIVGEGDTPFEGKQT--LHLKVKE--GAPLPFAFD 55
Q8T5F1/1-219      --MSVKSVMKIKLRMEGAVNGHNFVIVGEGEKPYEGTQS--MDLTVKE--GAPLPFAFD 55
Q7Z0W9/1-219      --MSVKSVMKIKLRMEGAVNGHNFVIVGEGEKPYEGTQS--MDLTVKE--GAPLPFAFD 55
Q6USK3/1-219      --MSVKSVMKIKRRMEGAVNGHNFVIVGEGEKPYEGTQS--MDLTVKE--GAPLPFAFD 55
A7UAL4/1-219      --MSVIKPDMKIKLRMEGAVNGHGFVIEGEGKPFEGTQS--MDLTVKE--GAPLPFAFD 55
A7UAM0/1-219      --MSVKSVMKIKLRMEGAVNGHNFVIVGEGEKPYEGTQS--MDLTVKE--GGPLPFAFD 55
Q7Z0W5/1-218      --MSVKSVMKIKLHMDGIVNGHKFMITGEGEKPFEGTHT--IILKVKE--GGPLPFAFD 55
Q95UA7/1-218      --MSVKSVMKIKLRMDGIVNGHKFMITGEGEKPFEGTHT--IILKVKE--GGPLPFAFD 55
A7UAL1/1-218      --MSVKSVMKIKLRMDGIVNGHKFMITGEGEKPFEGTHT--IILKVKE--GGPLPFAFD 55
A8CLP7/1-218      --MSVIKTDMLIKLRQMGAVNGHFPVITGEGEKPYEGKHT--INLTVQD--GGPLPFAFD 55
A7UAL2/1-218      --MSVKSVMKIKLRMDGIVNGHKFMITGEGEKPFEGTHT--IILKVKE--GGPLPFAFD 55
A7UAL5/1-218      --MSVIKPDMKIKLRMQGVVNGHKFVIEGEGKPFEGTQT--INLTVKE--GAPLPFAFD 55
Q963F5/1-218      --MSVIKPDMKIKLRMQGVVNGHKFVIEGEGKPFEGTQT--INLTVKE--GAPLPFAFD 55
Q7Z0W4/1-218      --MSVIKPDMKIKLRMEGAVNGHNFVIEGEGKPFEGTQT--INLTVKE--GGPLPFAFD 55
Q66ND3/1-218      --MSVIKPDMKIKLRMEGAVNGHNFVIEGEGKPFEGTQT--INLTVKE--GGPLPFAFD 55
Q2LI64/1-35       --MSVMKSEMKIKLRMEGAVNGHTFEIEGEGKPFEGTHT----- 35
Q60I25/1-218      --MSVIKPEMKIKLCMRGTVNGHNFVIEGEGKPNPYEGTQI--LDLNVTE--GAPLPFAFD 55
Q60I24/1-218      --MSVIKPEMKIKLCMRGTVNGHNFVIEGEGKPNPYEGTQI--LDLNVTE--GAPLPFAFD 55
A8CLT2/1-218      --MNVIKPDMKIKLCMRGTINGHNFVIEGEGKPNPYEGTQI--LDLNVTE--GAPLPFAFD 55
B5BR3/1-218      --MSVIKQEMKIKLHMDGAVNGHAFVIEGDKGKPYDGTQT--LNLVKE--GAPLPFSYD 55
B6CT26/1-219      --MSVIKQEMKIKLHMDGAVNGHAFVIEGDKGKPYDGTQT--LNLVKE--GAPLPFSYD 55
Q9U6Y3/43-260     --MGVIKPDMKIKLRMEGAVNGHAFVIEGEGKPYDGTHT--LNLVKE--GAPLPFSYD 55
Q8T6U0/1-218      --MNLIKEDMRVVKHMEGAVNGHAFVIEGEGKPYDGTQT--LNLVKE--GAPLPFSYD 55
Q8T5F0/7-229      --KNVVKDFMKITLRMDGAVNGKFAVNGTGDGNPYGGIQS--LKLTVDG--NKPLPFAFD 55
Q8T5F3/6-223      --MKVKEHMKIKLRMGVTVNGKFAVNGTGDYYPYQKQI--LKLIVEG--SEPLPFAFD 54
Q66PW0/1-221      --MNALQEMKIKLTMVGVVNGQSFKIDGKGGKPYEGSQE--LTLKVVE--GGPLFSYD 55
Q8MU46/1-221      --MNALQEMKIKLTMVGVVNGQSFKIDGKGGKPYEGSQE--LTLKVVE--GGPLFSYD 55
Q8T5E9/1-221      --MSALKEEMKIKLTMVGVVNGQSFQIDGEGKGGKPYEGSQE--LTLVVE--GGPLFSYD 55
Q8T5E8/1-221      --MSALKEEMKIXLTLVGVVNGHFPKIDGKGGKPYEGSQE--LTLVVE--GGPLFSYD 55
Q8T6T8/1-221      --MSALKEEMKINLTMVGVVNGLPFKIRGDKGGKPYEGSQE--LTLVVK--GGPLFSYD 55
Q66PU5/1-220      --MSVIVKEMTKLHMEGTVNGHAFVIEGEGKGGDPYNGVQS--MNLVKG--GAPLPFSYD 55
A8CL57/1-220      --MSVIVKEMTKLHMEGTVNGHAFVIEGEGKGGDPYNGVQS--MNLVKG--GAPLPFSYD 55
```

Supplementary Material (ESI) for Molecular BioSystems  
This journal is (c) The Royal Society of Chemistry, 2011

Q8MMA2/34-254 --TNGIAEEMKTRVHLEGTVNGHSFTIKGEGRGPYKGEQF-MSLEVVN--GAPLPFSFD 55  
Q8MMA1/12-234 --VNGIAEEMKTDLIMEGIVNGHSFTIEGKGTGYXKGDQF-MKLEVVK--GAPLPFSFD 55  
Q66ND6/5-222 --KSVIKEEMLINLHLEGTFNHGYFEIKGKGGKPNNEGTNT-VTLEVTK--GGPLPFGWH 55  
Q9U67/5-223 --KSVIKEEMLIDLHLEGTFNHGYFEIKGKGGKPNNEGTNT-VTLEVTK--GGPLPFGWH 55  
Q55367/6-223 --EEVIKEFMRFKVMEGSVNGHEFEIEGEGEGRPYEGTQT-ARLKVTK--GGPLPFAWD 55  
Q55368/6-223 --EEVIKEFMRFKVMEGSVNGHEFEIEGEGEGRPYEGTQT-AKLKVTK--GGPLPFAWD 55  
Q2LI66/5-222 --KNVIKEFMRFKVMEGTVNGHEFEIEGEGEGRPYEGHNT-VKLKVTK--GGPLPFAWD 55  
Q66ND8/5-222 --KNVIKEFMRFKVMEGTVNGHEFEIEGEGEGRPYEGHNT-VKLKVTK--GGPLPFAWD 55  
Q66ND7/5-222 --KNVIKEFMRFKVMEGTVNGHEFEIEGEGEGRPYEGHNT-VKLKVTK--GGPLPFAWD 55  
Q9U6Y8/5-222 --KNVIKEFMRFKVMEGTVNGHEFEIEGEGEGRPYEGHNT-VKLKVTK--GGPLPFAWD 55  
Q6K85/5-222 --KNVIKEFMRFKVMEGTVNGHEFEIEGEGEGRPYEGHNT-VKLKVTK--GGPLPFAWD 55  
Q2WG74/7-224 --ENVITFMRFKVMEGTVNGHEFEIEGEGEGRPYEGHNT-VKLKVTK--GGPLPFAWD 55  
Q9GTJ7/5-224 --KNVIKEFMRFKVMEGTVNGHEFEIKGEGEGRPYEGHCS-VKLMVTK--GGPLPFAFD 55  
A8CLM7/1-218 --MSVIAKQMTYKYVMSGTVNGHYFEVQDGGKGPYEGEQT-VRLTVTK--GGPLPFAWD 55  
A8CLM1/1-218 --MSVIAKQMTYKYVMSGTVNGHYFEVEGDGKGPYEGEQT-VKLTVTK--GGPLPFAWD 55  
Q1JU63/2-219 --VSVIAKQMTYKYVMSGTVNGHYFEVEGDGKGPYEGEQT-VKLTVTK--GGPLPFAWD 55  
Q1JV71/2-219 --VSVIAKQMTYKYVMSGTVNGHYFEVEGDGKGPYEGEQT-VKLTVTK--GGPLPFAWD 55  
Q1JV72/2-219 --VSVIAKQMTYKYVMSGTVNGHYFEVEGDGKGPYEGEQT-VKLTVTK--GGPLPFAWD 55  
Q1JV70/2-219 --VSVIAKQMTYKYVMSGTVNGHYFEVEGDGKGPYEGEQT-VKLTVTK--GGPLPFAWD 55  
B5T1L1/1-218 --MSVIAKQMTYKYVMSGTVNGHYFEVEGDGKGPYEGEQT-VRLAVTK--GGPLPFAWD 55  
A8CLV6/1-218 --MSVIAKQMTYKYVMSGTVNGHYFEVEGDGKGPYEGEQT-VKLTVTK--GGPLPFAWD 55  
Q66P0/1-218 --MSVIAKQMTYKYVMSGTVNGHYFEVEGDGKGPYEGEQT-VKLTVTK--GGPLPFAWD 55  
Q66P8/1-218 --MSVIAKQMTYKYVMSGTVNGHYFEVEGDGKGPYEGEQT-VKLTVTK--GGPLPFAWD 55  
Q9SP04/1-218 --MSVIAKQMTYKYVMSGTVNGHYFEVQDGGKGPYEGEQT-VKLTVTK--GGPLPFAWD 55  
A8CLL3/1-218 --MSVIAKQMTYKYVMSGTVNGHYFEVQDGGKGPYEGEQT-VKLTVTK--GGPLPFAWD 55  
Q66P1/1-218 --MSVIAKQMTYKYVMSGTVNGHYFEVEGDGKGPYEGEQT-VKLTVTK--GGPLPFAWD 55  
Q66P9/1-218 --MSVIAKQMTYKYVMSGTVNGHYFEVEGDGKGPYEGEQT-VRLTVTK--GGPLPFAWD 55  
P83690/1-218 --MSVIAKQMTYKYVMSGTVNGHYFEVEGDGKGPYEGEQT-VKLTVTK--GGPLPFAWD 55  
A8CLN8/6-226 --QSGVDVMTLHMDGIVNGHPFEIKGKGGKPNYKGVQT-MKLVTK--GAPLPFSID 55  
B6CTZ7/1-220 --MSVIKQVMKTLHLEGTVNGHDFITIEGKGGKPYEGLQH-MKMTVTK--GAPLPFSVH 55  
Q9U6Y5/5-228 --KHGLTKEMTKYRMEGCVGDGHKVFITGEGIGYPPFKGQA-INLCVVE--GGPLPFAED 55  
Q9U6Y4/5-228 --KHGLTKEMTKYRMEGCVNGHKVFITGEGIGYPPFKGQA-INLCVIE--GGPLPFSED 55  
Q8T4U4/5-228 --KHGLTDDMTMFRMEGCVGDGHKVFIEGNGNPNFKGQF-INLCVIE--GGPLPFSED 55  
B2ZAG2/5-226 --KHGLTNDMTMFRMEGCVGDGHQFVITGHGNGNPFTEGQT-INLCVDK--GGPLPFSED 55  
Q69ZV6/5-228 --KHGLTKDMTMXYHMEGSDVGHKVFITGHGNGNPFTEGQT-INLCVAE--GGPLPFSED 55  
-----  
B5LIN1/1-161 -----  
B5T1L5/5-228 --KHGLTKDMTMXYHMEGSDVGHKVFITGHGNGNPFTEGQT-VNLCVAE--GGPLPFSED 55  
Q66PV2/5-228 --KHGLTKDMTMXYHMEGSDVGHKVFITGHGNGNPFTEGQT-MNLCVVE--GGPLPFSED 55  
Q86LC2/5-228 --KHGLDFDMTMXYRMEGCVGDGHKVFITGHGTGNPFAGKQN-VNLCVIE--GGPLPFSED 55  
B2ZAG1/5-228 --KQGLTDNMTMXYQMEGCVGDGHQFVITGHGKGNPFGKQT-LNLCVDK--GGPLPFSED 55  
A8CLN4/5-231 --KNGLTKNMTKYRMEGCVGDGHKVFITGDGIDPPEGKQTSIDLVCVE--GGPLPFSED 56  
A8CLV1/5-230 --KNGVDRMKLKFHMEGCVNGHEFTIEGEGTGQPYEGTQS-IQLRVEK--GGPLPFSVD 55  
A8CLU7/1-223 ---MALPKQMKLYHMEGTVNGHFFIIEGEGEGEPYEGTHT-IKLQVVE--GSPLPFSFD 54  
A8CLP2/5-228 --KQSLPDSMKLIYHMDGCVNGHSFVIEGEGEGKPYEGTHT-IKLQVVE--GSPLPFSAD 55  
B6CTZ2/5-226 --KNVLPNMMLTYHMEGCVNGHNFIEIEGEGTGKPKGKHT-ITLQVVK--GGPLPFSVD 55  
Q2VTM9/5-219 --KQVLPDRVDMRYHMDGCVNGHQFIEIEGEGTGKPKGKHT-LKLRTK--GGPLPFAFD 55  
Q1ALD3/5-219 --KQVLPDRVDMRYHMDGCVNGHSFTIEGEGTGKPKGKHT-LKLRTK--GGPLPFAFD 55  
Q1ALD5/5-219 --KQVLPDRVDMRYHMDGCVNGHSFTIEGEGAGKPYEGKHT-LKLRTK--GGPLPFAFD 55  
Q1ALD4/5-219 --KQVLPDRVDMRYHMDGCVNGHYFTIEGEGTGKPKGKHT-LKLRTK--GGPLPFAFD 55  
Q09HR5/5-219 --KQVLPDRVDMRYHMDGCVNGHSFTIEGEGRGNPFKQQT-LKLRTK--GGPLPFAFD 55  
Q2VTM8/5-219 --KQVLPDRVDMRYHMDGCVNGHSFTIEGEGTGKPKGKHT-LKLRTK--GGPLPFAFD 55  
A8CLU1/1-218 ---MALSKQVTKYHMDGRFEDKFTIEGEGTGKPKGKHT-VTLVTK--GAPLPFSFD 54  
Q9U6Y6/5-224 --NFIQDDMKMTYHMDGCVNGHYFTVKEGNGKPYEGTQT-STFKVTMANGKPLPFSFD 57  
A8CL7/5-222 --KQCIANEMTMFHMDCVNGHYFTIEGEGSRPYEGKQM-SKFKVTK--GGPLPFSFD 55  
Q66ND1/5-220 --KQVILKDMNMLKFMKGSVNGHYFEIEGEGRGPYEGVQK-STFVTK--GGPLPFSFD 55  
Q66PV5/5-226 --KQGIQVMTKYHMEGCVNGHEFTIEGEGTGKPKGKHT-SELVITKPKGKPLPFSFD 57  
B5T1L2/5-226 --KQGIQVMTKYHMEGCVNGHEFTIEGEGTGKPKGKHT-SELVITKPKGKPLPFSFD 57  
Q66PV3/5-226 --KQGIQVMTKYHMEGCVNGHEFTIEGEGTGKPKGKHT-SELVITKPKGKPLPFSFD 57  
B5T1L0/5-226 --KQGIQVMTKYHMEGCVNGHEFTIEGEGTGKPKGKHT-SELVITKPKGKPLPFSFD 57  
Q66PV4/5-226 --KQGIQVMTKYHMEGCVNGHEFTIEGEGTGKPKGKHT-SELVITKPKGKPLPFSFD 57  
B5LIN0/5-226 --KQGIQVMTKYHMEGCVNGHEFTIEGEGTGKPKGKHT-SELVITKPKGKPLPFSFD 57  
B5T1L3/5-226 --KQGIQVMTKYHMEGCVNGHEFTIEGEGTGKPKGKHT-SELVITKPKGKPLPFSFD 57  
B5T1L4/5-226 --KQGIQVMTKYHMEGCVNGHEFTIEGEGTGKPKGKHT-SELVITKPKGKPLPFSFD 57  
Q66PV7/5-226 --KQGIQVMTKYHMEGCVNGHEFTIEGEGTGKPKGKHT-SELVITKPKGKPLPFSFD 57  
A8CLY3/5-226 --KQGIQVMTKYHMEGCVNGHEFTIEGEGTGKPKGKHT-SELVITKPKGKPLPFSFD 57  
Q66PV8/5-226 --KQGIQVMTKYHMEGCVNGHEFTIEGEGTGKPKGKHT-SELVITKPKGKPLPFSFD 57  
Q66PV9/5-226 --KQGIQVMTKYHMEGCVNGHEFTIEGEGTGKPKGKHT-SELVITKPKGKPLPFSFD 57  
A8CLX9/5-226 --KQGIQVMTKYHMEGCVNGHEFTIEGEGTGKPKGKHT-SELVITKPKGKPLPFSFD 57  
B6CTZ3/5-226 --KQGIQVMTKYHMEGCVNGHEFTIEGEGTGKPKGKHT-SELVITKPKGKPLPFSFD 57  
Q617B1/6-227 --KQGIQVMTKYHMEGCVNGHEFTIEGEGTGKPKGKHT-SELVITKPKGKPLPFSFD 57  
Q66PV6/5-226 --KHGITQEMTKYHMDGCVNGHEFTIEGEGTGKPKGKHT-AELVITKPKGKPLPFSFD 57  
Q86LV8/1-213 ---MAVPTQVKMYSMDGNFNGQSFVVEGEGTGNPYEGHQ-SLKLTV---KGEPLPFAFD 53  
Q86LV7/1-213 ---MAVPTQVKMYSMDGNFNGQSFVVEGEGTGNPYEGHQ-SLKLTV---KGEPLPFAFD 53  
A8CLR1/5-220 --KQGIQVMTKYHMEGCVNGHNFVKEGEGTGNPYEGHQ-LRLCITMAKGEVPPFAFD 57  
Q6R8F5/5-223 --KQVIGKEMNMTYHMDGCVNGHNFVEGEGTGNPYEGHQ-LKLRTK---KGEPLPFAFD 55  
Q6R8F4/1-219 ---MVLKQNMNTYHMDGCVNGHNFVEGEGTGNPYEGHQ-LKLRTK---KGEPLPFAFD 54  
Q6R8F3/5-220 --KQVIGKEMNMTYHMDGCVNGHNFVKEGEGTGNPYEGHQ-LSLHVT---GGQPLPFAFD 55  
Q617B2/2-218 --VSVIKPEMKRYHMDGCVNGHEFTIEGEGTGKPKGKHT-MTLRVTMAKGGPMPFAFD 57  
A7VMR3/2-218 --VSVIKPEMKRYHMDGCVNGHEFTIEGEGTGKPKGKHT-MTLRVTMAKGGPMPFAFD 57  
Q617B4/1-210 -----MKMYFMDGCVNGHEFTIEGEGTGKPKGKHT-MTLRVTMAKGGPMPFAFD 50  
Q617B3/1-217 --MSVIAKQMTYKYVMSGTVNGHYFEVEGDGKGPYEGEQT-VKLTVTK--GGPLPFAWD 55  
A8CLQ6/5-221 --KQAIKQDMKINYFMDGCVNGHEFTVKEGEGTGKPKGKHT-MTLRVTMAKGGPMPFAFD 57  
A8CLW9/4-223 --SKQVLNDVMTYFMDGCVNGHDFITIEGEGTGKPKGKHT-FNLRVT--KGAPLPFAVD 55

Supplementary Material (ESI) for Molecular BioSystems  
This journal is (c) The Royal Society of Chemistry, 2011

Q95W86/2-220 --AGLLKESMRKIYMEGTVNGYHFCKEAGEGDNPFEGTQN-MRIRVTE--GAPLPFAFD 55  
Q95W11/2-220 --AGLLKESMRKIYMEGTVNGYHFCKEAGEGDNPFEGTQN-MRIRVTE--GAPLPFAFD 55  
Q8MU45/2-220 --AGLLKESMRKIYMEGTVNGYHFCKEAGEGDNPFEGTQN-MRIRVTE--GAPLPFAFD 55  
Q95W85/2-220 --AGLLKESMRKIYMEGTVNGYHFCKEAGEGDNPFEGTQS-MRIRVTE--GAPLPFAFD 55  
ASYTR7/2-222 --ASFLKKTMPFKTTIEGTVNGHYFKCTGKGEKNPFEGTQE-MKIEVIE--GGPLPFAFH 55  
Q9GZ28/2-222 --ASFLKKTMPFKTTIEGTVNGHYFKCTGKGEKNPFEGTQE-MKIEVIE--GGPLPFAFH 55  
ASYTR8/2-222 --ASFLKKTMPFKTTIEGTVNGHYFKCTGKGEKNPFEGTQE-MKIEVIE--GGPLPFAFH 55  
Q9GP15/2-222 --ASFLKKTMPFKTTIEGTVNGHYFKCTGKGEKNPFEGTQE-MKIEVIE--GGPLPFAFH 55  
Q2VFP3/2-221 --ASLVKDDMCIKMTMEGTVNGHHFKCVGEGEGKPFEGTQV-EKIRITE--GGPLPFAFD 55  
A0AQQ7/2-222 --ASKISDNVRKILYMEGTVNNHHFCEAEAGEGKPYEGTQM-ENIKVTK--GGPLPFSFD 55  
A0AQQ8/2-222 --ASKISDNVRKILYMEGTVNNHHFCEAEAGEGKPYEGTQM-ENIKVTK--GGPLPFSFD 55  
Q8T5F8/2-222 --NSLIKENMRMVMMEGVSNGYQFKCTGEGDGNPYMGQT-MRIKVVE--GGPLPFAFD 55  
Q86LV4/2-220 --YSYIKETMRKSVYMEGNVNNHAFKCTAEGEGKPYKGSQK-LTITVTE--GGPLPFAFD 55  
Q5QIU5/2-220 --YSYIKETMRKSVYMEGNVNNHAFKCTAEGEGKPYKGSQK-LTITVTE--GGPLPFAFD 55  
Q8T6T9/2-220 --CSYIKETMQSKVYMEGNVNNHAFKCTAEGEGKPYKGSQK-LTITVTE--GGPLPFAFD 55  
Q8T5E7/2-220 --YPIWIKETMRKSVYMEGNVNNHAFKCTAEGEGKPYKGSQK-LTITVTE--GGPLPFAFD 55  
ASYTR6/2-219 --YPIWIKETMRVQLSMEGSVNYHAFKCTGKGEKPYEGTQS-LNITITE--GGPLPFAFD 55  
Q9GP16/2-219 --YPIWIKETMRVQLSMEGSVNYHAFKCTGKGEKPYEGTQS-LNITITE--GGPLPFAFD 55  
Q5ZQ06/2-221 --DPLVNGNLKIKMFMNGSVNKHFKCEAEGEGNIHSGTHI-MKITVTE--GGPLPFAFD 55  
B9UPG6/1-219 --MSQFPEYLPVTVHMRGNVNNLEFEYDGGGGDPRAGFT-MNMQLRG--RKPLPFSYD 55  
Q5ZQ05/1-219 --MSQDNNLSVSVYMKGNVNNHEFEYDGGGGDPSGQFS-LKTKLRG--GKPLPFSYD 55  
Q7Z168/1-218 ---MNLKSNVSVSVYMKGNVNNHEFEYDGGGGDPTGKYS-MKMTLRG--QNCLPFSYD 54  
Q9BLZ0/8-225 --NTGLKEIMSASAKAVEGIVNNHVFMEGFGKGNVLFGNQL-MQIRVTK--GGPLPFAFD 55  
Q9BLY9/8-225 --NTCLQEVMSYKVNLEGI VNNHVTFMEGCKGNILFGNQL-VQIRVTK--GAPLPFAFD 55  
Q96319/5-223 --KGLKEVMPKTINLEGLVGDHAFSMEGVGEGNILEGTQE-VKISVTK--GAPLPFAFD 55  
A8CLX6/5-222 --KQALADTMKMTWLMGVSNGHAFTEGEGTKPYEGKQS-GTFRVTK--GGPLPFAFD 55  
A7S3R2/57-279 --YSLKSDAMKLFHFKMEGVSNGHCFEIQGVGEGKAFDGEHW-SKLCVVK--GKHLPFSFD 55  
A7RQ05/1-174 ---MKLHFLEGSVNGHCFEIQGEGEGKPFEGEQW-AKHCVVK--GKHLPFLD 48  
A7S1H5/1-224 ---MSLSDAMKLLHILEGSVNGHCFEIHGEGKAFEGEQW-SKFTVVK--GGPLPFSFD 55  
A7S1H3/1-82 -----  
B1PNC2/5-218 -----ATHELHIFGSFNGVDFDMVGHGTGNPNDGYEE---LNLKSTKGALQFSPW 47  
B1PNC0/4-217 -----PATHELHIFGSFNGVDFDMVGRGTGNPNDGYEE---LNLKSTKGALQFSPW 48  
B1PNC1/5-218 -----ATHELHIFGSFNGVDFDMVGRGTGNPNDGYEE---LNLKSTKGALQFSPW 47  
B1PNC4/5-218 -----ATHELHIFGSFNGVDFDMVGRGTGNPNDGYEE---LNLKSTKGALQFSPW 47  
C3YR99/48-261 -----LPTTHELHIFGSFNGVDFDMVGRGTGNPNDGYEE---LNLKSTKGALQFSPW 49  
B1PNC3/4-217 -----PATHELHIFGSINSLEFDLVGRGTGNPKEGYEE---LHLKSTKSALQFSPW 48  
B1PNC8/5-217 -----ATHELHIFGSINSLEFDLVGRGTGNPKEGYEE---LHLKSTKSALQFSPW 47  
B1PNC9/4-216 -----PATHELHIFGSINSLEFDLVGRGTGNPKEGYEE---LHLKSTKSALQFSPW 48  
C3YRA1/51-267 -----LPKTHELHIFGSFNGVDFDMVGRGTGNPNEGSEE---LKLKSTNGPLKFSFY 49  
C3YRA2/11-223 -----PKTHELHIFGSFNGVDFDMVGRGTGNPNEGSEE---LNAKFTKGPLKFSFY 48  
B1PND7/4-187 -----PATHELHIFGKINGHEYDMRGKGTGNPNDGYED---LDLKSTKDDLQFSPW 48  
B1PND6/5-189 -----KTHELHIFGKINGHEYDMRGKGTGNPNDGYED---LDLKS-KDDLQFSPW 46  
B1PND8/4-184 -----PATHELHIFGKINGHEYDMRGKGTGNPNDGYED---LDLKSTKDDLQFSPW 48  
B1PND5/5-186 -----ATHELHIFDINGHEYDMRGKGTGNPNDGYED---LDLKSTKDDLQFSPW 47  
C3YRA3/4-216 -----PTTHEVHYGISINGVEFDLVGSGKGNPKDGESE---IQVKSTKGPLKFSFY 48  
B1PND3/4-217 -----PATHDLHISGSINGHEFDLEGSKGNAKEGYQE---LHLKSNKGDLSFSPW 48  
B1PND2/5-217 -----ATHDLHISGSINGHEFDLEGSKGNAKEGYQE---LHLKSNKGDLSFSPW 47  
B1PNC9/4-217 -----PATHDLHISGSINGHEFDLEGSKGNAKEGYQE---LHLKSNKGDLSFSPW 48  
B1PNC6/5-217 -----ATHDLHISGSINGHEFDLEGSKGNAKEGYQE---LHLKSNRGLDSFSPW 47  
B1PNC7/4-220 -----PATHDLHISGSINGHEFDLEGSKGNAKEGYQE---LHLKSNKGDLSFSPW 48  
B1PND0/5-220 -----ATHDLHISGSINGHEFDLEGSKGNAKEGYQE---LHLKSNKGDLSFSPW 47  
B1PNC5/5-220 -----ATHDLHISGSINGHEFDLEGSKGNAKEGYQE---LHLKSNKGDLSFSPW 47  
B1PND1/5-217 -----KTHDLHISGSVNGHEFDLEGSKGNAKEGYQE---LHLKSNRGLDSFSPW 47  
B1PND4/5-217 -----KTHDLHISGSVNGHEFDLEGSKGNAKEGYQE---LHLKSNRGLDSFSPW 47  
B1PNC8/4-69 -----PATHDLHISGSINGHEFDLEGSKGNAKEGYQE---LHLKSNRGLDSFSPW 48  
C3YRA0/8-104 TSAVTEPLPTTHELHIFGSFNGVDFDLVGRGEGNPKDGSQK---LHLKSTKGALQFSPW 56  
C3YKQ3/5-218 -----ATHDLHISGSINGHEFDLVGGGKGNPAGSLV---TTAKSTKGALQFSPW 47  
C3YK7/5-217 -----ATHEIHLHGSVNGHEFDLVGGGKGNPAGSLV---TEVKSTMGPLKFSFY 47  
C3YKQ2/53-191 -----  
A8QZ9/4-215 -----PTTHDLHIFGSVNGAEFDLVGGGKGNPNDGTL---TSVKSTRGALPCSPL 48  
C3YK9/5-215 -----TAHDLHIFGSVNGAEFDLVGGGKGNPNDGTL---TSVKSTRGALPCSPL 47  
C3YKQ1/4-215 -----PTTHDLHIFGSVNGAEFDLVGGGKGNPNDGTL---TSVKSTRGALPCSPL 48  
C3ZLQ0/369-585 ---TMSVPTNLDLHIYGSINGMEFDLVGGGSGNPNDSLS---VNVKSTKGALRVSP 52  
C3YK10/4-218 -----KSVPTNLDLHIYGSINGMEFDLVGGGSGNPKDGSLSA---VNVKSTKGALRVSP 51  
C3YKQ0/5-214 -----TAHCHMFGSINGHEFDLVGGGKGNPNDGTL---TKVRSTKGPLPFSV 47  
Q6W10/1-215 -----MPDMKLECHISGTMNGEEFELVAGDGNTEGRMT---NKMKSIGPLSFSFY 50  
Q6W09/1-217 -----MPDMKLECHISGTMNGEEFELVAGDGNTEGRMT---NKMKSIGPLSFSFY 50  
Q6W11/1-215 -----MPVMKIECRISGTMNGEEFELVAGDGNTEGRMT---NKMKSIGPLSFSFY 50  
Q6W12/1-213 -----MPAMKIECRITGLNGVFEFELVGGGEGTPEQGRMT---NKMKSIGPLSFSFY 50  
Q6W13/1-214 -----MPAMKIECRISGTLNGVFEFELVGGGEGTPEQGRMT---NKMKSIGPLSFSFY 50  
Q6W08/1-214 -----MAAMKIECRITGLNGVFEFELVGGGEGTPEQGRMT---NKMKSIGPLSFSFY 50  
Q2MHN7/1-215 -----MTTFKIESRIHGNLNGEKFELVGGVGG---EEGRLE---IEMKTKDKPLAFSP 48  
  
Q17106/5-229 TLVTTFSYGVQCFSRYPDHMKQHDFFKSAMPEG---YVQERTIFYK-DDGNYKTRAEV- 108  
Q17105/5-229 TLVTTFSYGVQCFSRYPDHMKQHDFFKSAMPEG---YVQERTIFYK-DDGNYKTRAEV- 108  
P42212/5-229 TLVTTFSYGVQCFSRYPDHMKQHDFFKSAMPEG---YVQERTIFFK-DDGNYKTRAEV- 108  
Q6YGZ0/5-229 TLVTTFSYGVQCFSRYPDHMKQHDFFKSAMPEG---YIQERTIFFK-DDGNYKTRAEV- 108  
Q8WTC5/5-229 TLVTTLYGILCFARYPEHMKMNDFFKSAMPEG---YIQERTIFFQ-DDGKYKTRGEV- 108  
Q8WTC4/5-229 TLVTTLYGILCFARYPEHMKMNDFFKSAMPEG---YIQERTIFFQ-DDGKYKTRGEV- 108  
Q8WTC9/5-229 TLVTTLYGIQCFARYPEHMKMNDFFKSAMPEG---YIQERTIFFQ-DDGKYKTRGEV- 108  
Q8WTD0/5-229 TLVTTLYGIQCFARYPEHMKMNDFFKSAMPEG---YIQERTIFFQ-DDGKYKTRGEV- 108  
Q8WTC8/5-229 TLVTTLYGIQCFARYPEHMKMNDFFKSAMPEG---YIQERTIFFQ-DDGKYKTRGEV- 108

Q8WTC6/5-229 TLVTTLSYGIQCFARYPEHMKMNDFFKSAMPEG----YIQERTIFFQ--DDGKYKTRGEV- 108  
Q8WP95/5-229 TLVTTFSYGIQCFARYPEHMKMNDFFKSAMPEG----YIQERTIFFQ--DDGKYKTRGEV- 108  
Q8WTC7/5-229 TLVTTLSYGIQCFARYPEHMKMNDFFKSAMPEG----YIQERTIFFQ--DDGKYKTRGEV- 108  
Q6RYS7/5-229 TLVTTLYTGAQCFARYPELK--DFYKSCMPEG----YVQERTITFE--GDGVFKTRAEV- 106  
Q6RYS6/39-258 SLITLSYGAQCFARYPEIN--DFKSTFPGS----YHQERKITYE--NDGVLTAALKI- 106  
Q6RYS5/2-222 SLITLSYGGKCFVRYPNVIK--DFKSTFPTG----YHQERKITYE--DDGVLTAALKV- 106  
Q6RYS4/5-225 PICHLIQYGEPPFAKYPNGIS--HFAQCFPEG----LIDRTVRFE--NDGMTSHHTY- 106  
Q2TCH5/5-225 PICHLIQYGEPPFAKYPDGIS--HFAQCFPEG----LIDRTVRFE--NDGMTSHHTY- 106  
Q53UG7/1-221 ILTTVFYDGNRVFVKYPEEIV--DYFKQSFP----EGYSWERSMSYE--DGGICLATNMI- 107  
Q53UG8/1-221 ILTTAFHYGNRVFVYEPEDIV--DYFKQSFP----EGYSWERSMSYE--DGGICLATNMI- 107  
Q8MU48/1-218 ILTTAFYDGNRVFVKYPEDIP--DYFKQSFP----EGYSWERSMSYE--DGGICLATNMI- 107  
A8CLW1/1-218 ILTTIFNYGNRVFVKYPPDIP--DYFKQSFP----EGYSWERSMSYE--DGGICLATNMI- 107  
B6CTZ4/1-218 ILTTIFNYGNRVFVKYPPDIP--DYFKQSFP----EGYSWERSMSYE--DGGICLATNMI- 107  
Q5TLG6/1-218 ILTTVFYDGNRVFVKYPENIV--DYFKQSFP----EGYSWERSMSYE--DGGICLATNMI- 107  
A8CLQ1/1-223 ILTTSFNYGNRVFVKYPTDIP--DYFKQSFP----EGYSWERSMSYE--DGGICLATNMI- 107  
Q2LI65/1-219 ILTTVFHYGNRVFVKYPGDIA--DYFKQSFP----EGYSWERSMSYE--DGGICLATNMI- 107  
A8CLW4/1-222 ILTTVFYDGNRVFVKYPTDIA--DYFKQSFP----EGYSWERSMSYE--DGGICLATNMI- 107  
B6CTZ5/4-224 ILTTVFYDGNRVFVKYPEIV--DYFKQSFP----EGYSWERSMSYE--DGGICLATNMI- 107  
A3F207/1-221 ILTTVFHYGNRVFVKYPPDIP--DYFKQSFP----EGYSWERSMSYE--DGGICLATNMI- 107  
Q962P9/1-221 ILTTVFYDGNRVFVKYQDIP--DYFKQSFP----EGYSWERSMSYE--DGGICLATNMI- 107  
Q7Z0W8/1-221 ILTTVFYDGNRVFVKYQDIP--DYFKQSFP----EGYSWERSMSYE--DGGICLATNMI- 107  
Q66ND5/1-221 ILTTVFYDGNRVFVKYPKDIP--DYFKQSFP----EGYSWERSMSYE--DGGICLATNMI- 107  
Q66ND4/1-221 ILTTVFYDGNRVFVKYPKDIP--DYFKQSFP----EGYSWERSMSYE--DGGICLATNMI- 107  
Q66ND2/1-221 ILTTVFYDGNRVFVKYPKDIP--DYFKQSFP----EGYSWERSMSYE--DGGICLATNMI- 107  
A7UAL7/1-221 ILTTVFYDGNRVFVKYPKDIP--DYFKQSFP----EGYSWERSMSYE--DGGICLATNMI- 107  
Q7Z0W6/1-221 ILTTVFYDGNRVFVKYPKDIP--DYFKQSFP----EGYSWERSMSYE--DGGICLATNMI- 107  
A7UAL9/1-221 ILTTVFYDGNRVFVKYPKDIP--DYFKQSFP----EGYSWERSMSYE--DGGICLATNMI- 107  
Q8T5F2/8-228 ILTTVFYDGNRVFVKYPEDIA--DYFKQSFP----EGYFWERSMSYE--DGGICLATNMI- 107  
Q7Z0W7/8-228 ILTTVFYDGNRVFVKYPEDIA--DYFKQSFP----EGYFWERSMSYE--DGGICLATNMI- 107  
Q8MU47/8-228 ILTTVFYDGNRVFVKYPEDIA--DYFKQSFP----EGYFWERSMSYE--DGGICLATNMI- 107  
Q95V10/1-221 ILTTVFYDGNRVFVKYQDIP--DYFKQSFP----EGYFWERSMSYE--DGGICLATNMI- 107  
A7UAL3/1-221 ILTTVFYDGNRVFVKYPKDIP--DYFKQSFP----EGYSWERSMSYE--DGGICLATNMI- 107  
A7UAL6/1-218 ILTTVFYDGNRVFVKYPKDIP--DYFKQSFP----EGYSWERSMSYE--DGGICLATNMI- 107  
A7UAL8/1-218 ILTTVFYDGNRVFVKYPKDIP--DYFKQSFP----EGYSWERSMSYE--DGGICLATNMI- 107  
A8CL52/1-219 ILTTAFHYGNRVFVKYDPDIP--DYFKQSFP----NGFSWERSLMFE--DGGICLATNMI- 107  
Q8I6J8/1-219 ILTTAFHYGNRVFVKYDPDIP--DYFKQSFP----KGSWERSLMFE--DGGICLATNMI- 107  
A3F208/1-219 ILTTAFHYGNRVFVKYGNIP--DYFKQSFP----KGSWERSLMFE--DGGICLATNMI- 107  
A8CLR7/1-219 ILTTAFHYGNRVFVKYDPDIP--DYFKQSFP----GGYSWERSLMFE--DGGICLATNMI- 107  
Q55629/1-219 ILTTAFHYGNRVFVKYDPDIP--DYFKQSFP----KGSWERSLMFE--DGGICLATNMI- 107  
Q66PW1/5-223 ILTTAFHYGNRVFVKYDPDIP--DYFKQSFP----KGSWERSLMFE--DGGICLATNMI- 107  
Q8T5F1/1-219 IMTTVFHYGNRVFVKYKHIP--DYFKQSFP----EYSWERSMSYE--DGGICLATNMI- 107  
Q7Z0W9/1-219 IMTTVFHYGNRVFVKYKHIP--DYFKQSFP----EYSWERSMSYE--DGGICLATNMI- 107  
Q6UKS3/1-219 IMTTVFHYGNRVFVKYKHIP--DYFKQSFP----EYSWERSMSYE--DGGICLATNMI- 107  
A7UAL4/1-219 IMTTAFHYGNRVFVKYKHIP--DYFKQSFP----EYSWERSMSYE--DGGICLATNMI- 107  
A7UAM0/1-219 ILTTVFYDGNRVFVKYKHIP--DYFKQSFP----EYSWERSMSYE--DGGICLATNMI- 107  
Q7Z0W5/1-218 ILTTAFYDGNRVFVKYKHIP--DYFKQSFP----EYSWERSMSYE--DGGICLATNMI- 107  
Q95UA7/1-218 ILTTAFYDGNRVFVKYKHIP--DYFKQSFP----EYSWERSMSYE--DGGICLATNMI- 107  
A7UAL1/1-218 ILTTAFYDGNRVFVKYKHIP--DYFKQSFP----EYSWERSMSYE--DGGICLATNMI- 107  
A8CLP7/1-218 ILTTAFYDGNRVFVKYKHIP--DYFKQSFP----AGYSWERSMSYE--DGGICLATNMI- 107  
A7UAL2/1-218 ILTTAFYDGNRVFVKYKHIP--DYFKQSFP----EYSWERSMSYE--DGGICLATNMI- 107  
A7UAL5/1-218 ILTTAFYDGNRVFVKYKHIP--DYFKQSFP----EYSWERSMSYE--DGGICLATNMI- 107  
Q963F5/1-218 ILTTAFYDGNRVFVKYKHIP--DYFKQSFP----EYSWERSMSYE--DGGICLATNMI- 107  
Q7Z0W4/1-218 ILTTAFYDGNRVFVKYKHIP--DYFKQSFP----EYSWERSMSYE--DGGICLATNMI- 107  
Q66ND3/1-218 ILTTAFYDGNRVFVKYKHIP--DYFKQSFP----EYSWERSMSYE--DGGICLATNMI- 107  
Q2LI64/1-35 -----  
Q60I25/1-218 ILTTVFYDGNRVFVKYKHIP--DYFKQSFP----EGYHWSERSMSYE--DGGICLATNMI- 107  
Q60I24/1-218 ILTTVFYDGNRVFVKYKHIP--DYFKQSFP----EGYHWSERSMSYE--DGGICLATNMI- 107  
A8CLT2/1-218 ILTTVFYDGNRVFVKYKHIP--DYFKQSFP----EGYHWSERSMSYE--DGGICLATNMI- 107  
B5BR3/1-218 ILTTAFYDGNRVFVKYKHIP--DYFKQSFP----EGYSWERSMSYE--DGGICLATNMI- 107  
B6CTZ6/1-219 ILTTAFYDGNRVFVKYKHIP--DYFKQSFP----EGYSWERSMSYE--DGGICLATNMI- 107  
Q9U6Y3/43-260 ILTTAFYDGNRVFVKYKHIP--DYFKQSFP----EGYSWERSMSYE--DGGICLATNMI- 107  
Q8T6U0/1-218 ILTTAFYDGNRVFVKYKHIP--DYFKQSFP----EGYSWERSMSYE--DGGICLATNMI- 107  
Q8T5F0/7-229 ILTTAFYDGNRVFVKYKHIP--DYFKQSFP----EGYSWERSMSYE--DGGICLATNMI- 109  
Q8T5F3/6-223 ILTTAFYDGNRVFVKYKHIP--DYFKQSFP----EGYSWERSMSYE--DGGICLATNMI- 108  
Q66PW0/1-221 ILTTIFQYGNRAFNVPKHIP--DIFKQTCVSG--DGGYSWQRTMTYE--DGGVCTATSNV- 110  
Q8MU46/1-221 ILTTIFQYGNRAFNVPKHIP--DIFKQTCVSG--DGGYSWQRTMTYE--DGGVCTATSNV- 110  
Q8T5E9/1-221 ILTTIFQYGNRAFNVPKHIP--DIFKQTCVSG--DGGYSWQRTMTYE--DGGVCTATSNH- 110  
Q8T5E8/1-221 ILTTIFVHYGNRAFNVPKHIP--DIFKQTCVSG--GAGYSWQRTMTYE--DGGVCTATSHI- 110  
Q8T6T8/1-221 ILTTMFQYGNRAFNVPKHIP--DIFKQTCVSG--NGYSWQRTMTYE--DGGVCTATSHI- 110  
Q66PUS/1-220 LLTPAFMYGNRVFVKYKHIP--DFKQVFP----EGYHWSERSMSYE--DQAVCTATSHI- 107  
A8CL57/1-220 LLTPAFMYGNRVFVKYKHIP--DFKQVFP----EGYHWSERSMSYE--DQAVCTATSHI- 107  
Q8MA2/34-254 LLTPAFMYGNRVFVKYKHIP--DFKQVFP----EGYHWSERSMSYE--DQAVCTATSHI- 107  
Q8MA1/12-234 LLTPAFMYGNRVFVKYKHIP--DFKQVFP----EGYHWSERSMSYE--DQAVCTATSHI- 107  
Q66ND6/5-222 ILCPQFYGNKAFVHPDIP--DYLKLSFP----EGYHWSERSMSYE--DGGICLATNMI- 107  
Q9U6Y7/5-223 ILCPQFYGNKAFVHPDIP--DYLKLSFP----EGYHWSERSMSYE--DGGICLATNMI- 107  
Q553G7/6-223 ILSPQFYGNKAFVHPDIP--DYLKLSFP----EGFKWERSMSYE--DGGVTVTQDS- 107  
Q553G8/6-223 ILSPQFYGNKAFVHPDIP--DYLKLSFP----EGFKWERSMSYE--DGGVTVTQDS- 107  
Q2LI66/5-222 ILSPQFYGNKAFVHPDIP--DYLKLSFP----EGFKWERSMSYE--DGGVTVTQDP- 107  
Q66ND8/5-222 ILSPQFYGNKAFVHPDIP--DYLKLSFP----EGFKWERSMSYE--DGGVTVTQDP- 107  
Q66ND7/5-222 ILSPQFYGNKAFVHPDIP--DYLKLSFP----EGFKWERSMSYE--DGGVTVTQDS- 107  
Q9U6Y8/5-222 ILSPQFYGNKAFVHPDIP--DYLKLSFP----EGFKWERSMSYE--DGGVTVTQDS- 107  
Q6K6F85/5-222 ILSPQFYGNKAFVHPDIP--DYLKLSFP----EGFKWERSMSYE--DGGVTVTQDS- 107  
Q2WG74/7-224 ILSPQFYGNKAFVHPDIP--DYLKLSFP----EGFKWERSMSYE--DGGVTVTQDS- 107

Supplementary Material (ESI) for Molecular BioSystems  
This journal is (c) The Royal Society of Chemistry, 2011

Q9GTJ7/5-223 ILSPQFYQGSKYVVKHPADIP--DYKLSFP---EGFKWERVMNFE-DGGVVTVSQDS- 107  
A8CLM7/1-218 ILSPLSQYGSIPFTKYPEDIP--DYVKQSFPP---EGYTWERIMNFE-DGAVCTVSND- 107  
A8CLM1/1-218 ILSPLSQYGSIPFTKYPEDIP--DYVKQSFPP---EGYTWERIMNFE-DGAVCTVSND- 107  
Q1JU63/2-219 ILSPLMICYGSIPFTKYPEDIP--DYVKQSFPP---EGYTWERIMNFE-DGAVCTVSND- 107  
Q1JV71/2-219 ILSPLFQYGSIPFTKYPEDIP--DYVKQSFPP---EGYTWERIMNFE-DGAVCTVSND- 107  
Q1JV72/2-219 ILSPLFQYGSIPFTKYPEDIP--DYVKQSFPP---EGYTWERIMNFE-DGAVCTVSND- 107  
Q1JV70/2-219 ILSPLQYGSIPFTKYPEDIP--DYFKQSFPP---EGYTWERIMNFE-DGAVCTVSND- 107  
B5T1L1/1-218 ILSPQCYGSIPFTKYPEDIP--DYVKQSFPP---EGYTWERIMNFE-DGAVCTVSND- 107  
A8CLV6/1-218 ILSPQCYGSIPFTKYPEDIP--DYVKQSFPP---EGYTWERIMNFE-DGAVCTVSND- 107  
Q66PV0/1-218 ILSPQCYGSIPFTKYPEDIP--DYVKQSFPP---EGYTWERIMNFE-DGAVCTVSND- 107  
Q66PU8/1-218 ILSPQCYGSIPFTKYPEDIP--DYVKQSFPP---EGYTWERIMNFE-DGAVCTVSND- 107  
Q9SP04/1-218 ILSPQCYGSIPFTKYPEDIP--DYVKQSFPP---EGYTWERIMNFE-DGAVCTVSND- 107  
A8CLL3/1-218 ILSPQAQYGSIPFTKYPEDIP--DYVKQSFPP---EGYTWERIMNFE-DGAVCTVSND- 107  
Q66PV1/1-218 ILSPQFYGSIPFTKYPEDIP--DYVKQSFPP---EGYTWERIMNFE-DDAVCTVSND- 107  
Q66PU9/1-218 ILSPQCYGSIPFTKYPEDIP--DYVKQSFPP---EGYTWERIMNFE-DGAVCTVSND- 107  
P83690/1-218 ILSPQCYGSIPFTKYPEDIP--DYVKQSFPP---EGYTWERIMNFE-DGAVCTVSND- 107  
A8CLN8/6-226 ILLPQHMYGSKPFKYPESIP--DYIKLSFP---EGITWERSMTFE-DGAVCTVSND- 107  
B6CTZ7/1-220 ILTPSHMYGSKPFKYPADIP--DYHKQSFPP---EGMSWERSMIFE-DGGVCTASNHSS 108  
Q9U6Y5/5-228 ILSAAFYGNRVFTEYPODIV--DYFKNSCPAG---YTWDRSFLFE-DGAVCICNADIT 108  
Q9U6Y4/5-228 ILSAGFKYGRIFTEYPODIV--DYFKNSCPAG---YTWGRSFLFE-DGAVCICNVDIT 108  
Q8T4U4/5-228 ILSAAFYGNRLFTEYPEGIV--DYFKNSCPAG---YTWHRSRFRFE-DGAVCICSADIT 108  
B2ZAG2/5-226 ILSAAFYGNRLFTEYPOQIV--DYFKNSCPAG---YTWQRSFLFE-DGAVCIASADIS 108  
Q692V6/5-228 ILSAAFYGNRVFTEYPOGMV--DFFKNSCPAG---YTWHRSLFFE-DGAVCTTSADIT 108  
B5LIN1/1-161 -----GNRVFTEYPOGMV--DFFKNSCPAG---YTWHRSLFFE-DGAVCTTSADIT 45  
B5T1L5/5-228 ILSAAFYGNRVFTEYPOGMV--DFFKNSCPAG---YTWHRSLFFE-DGAVCTTSADIT 108  
Q66PV2/5-228 ILSAAFYGNRVFTEYPOGMV--DFFKNSCPAG---YTWHRSLFFE-DGAVCTTSADIT 108  
Q86LC2/5-228 ILSTVFYGNRIFTEYPSIV--DYFKNSCPAG---HTWQRSLLFE-DGAVCIASADIS 108  
B2ZAG1/5-228 ILSAVFTYGNRIFADYPOQID--DYFKNSCPAG---YTWRSFLFE-DGAVAIASADIR 108  
A8CLN4/5-231 ILSAVFYGNRVFTKYPQDLV--DYFKNSCPAG---YTWQRSFLFE-DGAVCTASADIT 109  
A8CLV1/5-230 ILSAVFLYGNRVFTKYPQDLV--DYFKNSCPAG---YTWQRSFLFE-DGAVCTASADIT 108  
A8CLU7/1-223 ILSTVFYGNRCFTKYPNPVIV--DYFKNSCSGGG---YTFGRSFLYE-DGAVCTASGDI 108  
A8CLP2/5-228 ILSTVFYGNRCFTKYPNPVIV--DYFKNSCSGGG---YKFGRSFLYE-DGAVCTASGDI 108  
B6CTZ2/5-226 ILSTVFYGNRCFTKYPNPTV--DYFKNSCPPG---YTFERSFLYE-DGAVCTASGDI 109  
Q2VTM9/5-219 ILSVFTYGNRCFCEYPEDMP--DYFKQSLPEG---HSWERTLMFE-DGGCGTASAHIS 108  
Q1ALD3/5-219 ILSATFTYGNRCFCEYPEDMP--DYFKQSLPEG---YSWERTMME-DGACGTASAHIS 108  
Q1ALD5/5-219 ILSATFTYGNRCFCEYPEDMP--DYFKQSLPEG---YSWERTMME-DGGCGTSAHIR 108  
Q1ALD4/5-219 ILSATFTYGNRCFCEYPEDMP--DYFKQSLPEG---YSWERTMME-DGACGTASAHIS 108  
Q09HR5/5-219 ILSATFTYGNRCFCEYPEDMP--DYFKQSLPEG---YSWERTMME-DGGCGTASAHIS 108  
Q2VTM8/5-219 ILTATFYGNRCFCEYPEDMP--DYKQSFPEG---YSFERTMFE-DGACCTTSVHLS 108  
A8CLU1/1-218 ILSAVFLYGNRAFTDYPKIV--DYFKQSFPEG---YSFERTLFE-DGGYCTASADIS 107  
Q9U6Y6/5-224 ILSTVFYGNRCFTAYPTSM--DYFKQAFPDPG---MSYERTFTYE-DGGVATASWEIS 110  
A8CLT7/5-222 ILSAFYGNRCFTAYPAGMH--DYFKQAFPDPG---MSYERTFTFE-DGGVATASGDIS 108  
Q66ND1/5-220 ILSAFYGNRCFTKYPADMP--DYFKQAFPDPG---MSFERTTFE-DGGVATASGHIC 108  
Q66PV5/5-226 ILSTVFYGNRCFTKYPEGMP--DYFKQAFPDPG---MSFERSFLYE-DGGVATASWNIR 110  
B5T1L2/5-226 ILSTVFYGNRCFTKYPEGMP--DYFKQAFPDPG---MSYERSFLYE-DGGVATASWNIR 110  
Q66PV3/5-226 ILSTVFYGNRCFTKYPEGMP--DYFKQAFPDPG---MSYERSFLYE-DGGVATASWNIR 110  
B5T1L0/5-226 ILSTVFYGNRCFTKYPEGMP--DYFKQAFPDPG---MSYERSFLYE-DGGVATASWNIR 110  
Q66PV4/5-226 ILSTVFYGNRCFTKYPEGMP--DYFKQAFPDPG---MSYERSFLYE-DGGVATAGWNIG 110  
B5LIN0/5-226 ILSTVFYGNRCFTKYPEGMP--DYFKQAFPDPG---MSYERSFLYE-DGGVATASWNIR 110  
B5T1L3/5-226 ILSTVFYGNRCFTKYPEGMP--DYFKQAFPDPG---MSYERSFLYE-DGGVATASWNIR 110  
B5T1L4/5-226 ILSVFTYGNRCFTKYPADMP--DYFKQAFPDPG---MSYERSFLYE-DGAVATASWKIR 110  
Q66PV7/5-226 ILSVFTYGNRCFTKYPADMP--DYFKQAFPDPG---MSYERSFLYE-DGAVATASWKIR 110  
A8CLY3/5-226 ILSVFTYGNRCFTKYPADMP--DYFKQAFPDPG---MSYERSFLYE-DGAVATASWNIR 110  
Q66PV8/5-226 ILSVFTYGNRCFTKYPADMP--DYFKQAFPDPG---MSYERSFLYE-DGAVATASWNIR 110  
Q66PV9/5-226 ILSVFTYGNRCFTKYPADMP--DYFKQAFPDPG---MSYERSFLYE-DGAVATASWNIR 110  
A8CLX9/5-226 ILSVFTYGNRCFTKYPADMP--DYFKQAFPDPG---MSYERSFLYE-DGAVATASWNIR 110  
B6CTZ3/5-226 ILSVFTYGNRCFTKYPADIP--DYFKQAFPDPG---MSYERSFLYE-DGAVATASWNIR 110  
Q6I7B1/6-227 ILSTAFYGNRCFTKYPADMP--DYFKQAFPDPG---MSYERSFLYE-DGGVATASWSIR 110  
Q66PV6/5-226 ILSHTFYGNRCFTKYPADLP--DYFKQAYPGG---MSYERSFYQ-DGGIATASWNVG 110  
Q86LV8/1-213 ILSATFTYGNRVFTKYPEGKT--DYFKQAFPDPG---LWERTMTFE-DGGICTVAEIS 106  
Q86LV7/1-213 ILSATFTYGNRVFTKYPEGKT--DYFKQAFPDPG---LWERTMTFE-DGGICTVAEIS 106  
A8CLR1/5-220 ILSAAFYGNRCFTKYPDEIR--DYFKQAFPDPG---LWERSMAFE-DGASAATAEIS 110  
Q6R8F5/5-223 ILTAAFCYGNRCFVNYPAEIA--DYFKQAFPDPG---LWERSMTFE-DGGFAAVSADIS 108  
Q6R8F4/1-219 ILTAAFCYGNRCFVNYPAEIA--DYFKQAFPDPG---LWERSMTFE-DGGFAAVSADIS 107  
Q6R8F3/5-220 ILSAAFYGNRCFTKYPKEIP--DMFKQAFPDPG---MSWERTMTFE-DGGVASVSADIS 108  
Q6I7B2/2-218 LVSHVFCYGNRPFTKYPEEIP--DYFKQAFPDPG---LWERSLQFE-DGGSASVSADIS 110  
A7VMR3/2-218 LVSHVFCYGNRPFTKYPEEIP--DYFKQAFPDPG---LWERSLQFE-DGGSASVSADIS 110  
Q6I7B4/1-210 LVSHVFCYGNRPFTKYPEEIP--DYFKQAFPDPG---LWERSLQFE-DGGFAAVSADIS 103  
Q6I7B3/1-217 LVSHVFCYGNRPFTKYPEEIP--DYFKQAFPDPG---LWERSLQFE-DGGFAAVSADIS 110  
A8CLQ6/5-221 ILSHTFYGNRPFTKYPEEIP--DYFKQAFPDPG---LWERSLQFE-DGGFAAVSADIS 110  
A8CLW9/4-223 ILSAAFYGNRCFTKYPKEIP--DFFKQSLPEG---MSWERTMTFE-DGGIVIASAHIR 108  
Q9SW86/2-220 ILSPCCAYGSKTFIKHTSGIP--DYFKQSFPEG---FTWERTTIE-DGGVLT AHQDT- 107  
Q9SW11/2-220 ILSPCCAYGSKTFIKHTSGIP--DYFKQSFPEG---FTWERTTIE-DGGVLT AHQDT- 107  
Q8MU45/2-220 ILSPCCAYGSKTFIKHTSGIP--DYFKQSFPEG---FTWERTTIE-DGGRVLT AHQDT- 107  
Q9SW85/2-222 ILAPCCYGRSFTVHHTAEIP--DFFKQSFPEG---FTWERTTIE-DGGILT AHQDT- 107  
ASYTR7/2-222 ILSTSCMYGSKTFIKYVSGIP--DYFKQSFPEG---FTWERTTIE-DGGFLT AHQDT- 107  
Q9GZ28/2-222 ILSTSCMYGSKTFIKYVSGIP--DYFKQSFPEG---FTWERTTIE-DGGFLT AHQDT- 107  
ASYTR8/2-222 ILSTSCMYGSKTFIKYVSGIP--DYFKQSFPEG---FTWERTTIE-DGGFLT AHQDT- 107  
Q9GP15/2-222 ILSTSCMYGSKTFIKYVSGIP--DYFKQSFPEG---FTWERTTIE-DGGFLT AHQDT- 107  
Q2VFP3/2-221 ILAPCCMYGSKTFIKHVSIGIP--DYFKQSFPEG---FTWERTQIFE-DGGVLT AHQDT- 107  
A0AQQ7/2-222 ILTPNCYGSVAITKYTSIGIP--DYFKQSFPEG---FTWERTTIE-DGAYLTQQET- 107  
A0AQQ8/2-222 ILTPNCYGSVAITKYTSIGIP--DYFKQSFPEG---FTWERTTIE-DGAYLTQQET- 107  
Q81SF8/2-222 ILATSFMYGSKTFIKHTKGIP--DFFKQSFPEG---FTWERTVRYE-DGGVFTVMQDT- 107



Q86LV4/2-220 ILSHAFQYGNKVFTKYPDDIP--DFFKQSLSGG----FTWKRVSNYE-DGGVLTVDQKT- 107  
Q5QIU5/2-220 ILSHAFRYGNKVFTKYPDDIP--DFFKQSLSGG----FTWKRVSNYE-DGGVLTVDQKT- 107  
Q8T6T9/2-220 ILSHAFRYGNKVFAKYPKDPH--DFFKQSLPEG----FTWKRVSNYE-DGGVLTVDQKT- 107  
Q8T5E7/2-220 ILSHAFQYGNKVFTDYPDDIP--DFFKQSLSDG----FTWKRVSXYX-XGGVLTVDQKT- 107  
ASYTR6/2-219 ILSHAFQYGNKVFAKYPKEIP--DFFKQSLPGG----FSWKRVSSTYE-DGGVLTVDQKT- 107  
Q9GPI6/2-219 ILSHAFQYGNKVFAKYPKEIP--DFFKQSLPGG----FSWKRVSSTYE-DGGVLTVDQKT- 107  
Q5ZQ06/2-221 ILSRFTCYGKMLDNSNGNIP--DFFKQSLKDG----YSWERETTYE-DGGVLTVDQKT- 107  
B9UPG6/1-219 IITTFGQYVRAFTKYPDSIA--DYFKGSFPEA----FQWNRRIEFE-DGGVLTVDQKT- 107  
Q5ZQ05/1-219 IITTFGQYVRAFTKYPDSIA--DYFKGSFPEA----FQWNRRIEFE-DGGVLTVDQKT- 107  
Q7Z168/1-218 IITTFGQYVRAFTKYPDSIA--DYFKGSFPEA----FQWNRRIEFE-DGGVLTVDQKT- 106  
Q9BLZ0/8-225 IVSIAFYGNRTFTKYPDDIA--DYFVQSFPAQ----FFYERNLRFE-DGAVLTVQDET- 107  
Q9BL9/8-225 IVSFAFYGNRTFTKYPDDIS--DYFVQSFPAQ----FMYERTLRYE-DGAVLTVQDET- 107  
Q96319/5-223 IVSVAFSYGNRAYTGYPEEIS--DYFLQSFPEG----FTYERNIRYQ-DGAVLTVQDET- 107  
A8CLX6/5-222 IVAPTLKYGKCFMKYPADIP--DYFLQSFPEG----FTYERNIRYQ-DGAVLTVQDET- 107  
A7S3R2/57-279 ILMPSMSYGTQKFAKYPAGMT--DFFKAQAVENG--GLSWERTMTFE-DGGYCTAVNTSE 109  
A7RGQ5/1-174 IIMPNI7-----FAKYPDGMT--GFFKAQAVENG--GLSWERTMAFE-DRGYCTAVNTSE 97  
A7S1H5/1-224 LIAPCLKYKSGKPFVKYPDDMT--DFFKAQAVENG--GLSWERTMSLEQDGGFCSVVNTSK 110  
A7S1H3/1-82 -----MFYGSKAFKYPDGMT--DFFKAQAVENG--GLSWERTKTFE-DGGYCT--HST 46  
B1PNC2/5-218 ILVPIQIGYGFHQYLPFPDG-M--SPFQAAMKDG--GYQVHRTMQFE-DGASLTSNYRYT 101  
B1PNC0/4-217 ILVPIQIGYGFHQYLPFPDG-M--SPFQAAMKDG--GYQVHRTMQFE-DGASLTSNYRYT 102  
B1PNC1/5-218 ILVPIQIGYGFHQYLPFPDG-M--SPFQAAMKDG--GYQVHRTMQFE-DGASLTSNYRYT 101  
B1PNC4/5-218 ILVPIQIGYGFHQYLPFPDG-M--SPFQAAMKDG--GYQVHRTMQFE-DGASLTSNYRYT 101  
C3YR99/48-261 ILVPIQIGYGFHQYLPFPDG-M--SPFQAAMKDG--GYQVHRTMQFE-DGASLTAHFRTY 103  
B1PNC3/4-217 ILVPIQIGYGFHQYLPFPDG-M--SPFQAAMKDG--GYQVHRTMQFE-DGATLTGIYRYT 103  
B1PNC8/5-217 ILVPIQIGYGFHQYLPFPDG-M--SPFQAAMKDG--GYQVHRTMQFE-DGATLTGIYRYT 102  
B1PNC9/4-216 ILVPIQIGYGFHQYLPFPDG-M--SPFQAAMKDG--GYQVHRTMQFE-DGATLTGIYRYT 103  
C3YRA1/51-267 ILVPHLGYAFNQYLPFPDG-M--SPFQAAMKDG--GYQVHRTMQFE-DGAFVTAHLRYT 103  
C3YRA2/11-223 ILVPHLGYAFNQYLPFPDG-M--SPFQAAMKDG--GYQVHRTMQFE-DGASVTAHLRYT 102  
B1PND7/4-187 ILVQNIQYGFNQYLPFPDG-M--SPFQAAMKDG--GYEVRHREMEFE-DGATLTGIYRYT 103  
B1PND6/5-189 ILVQNIQYGFNQYLPFPDG-M--SPFQAAMKDG--GYEVRHREMEFE-DGATLTGIYRYT 101  
B1PND8/4-184 ILVQNIQYGFNQYLPFPDG-M--SPFQAAMKDG--GYEVRHREMEFE-DGATLTGIYRYT 103  
B1PND5/5-186 ILVQNIQYGFNQYLPFPDG-M--SPFQAAMKDG--GYEVRHREMEFE-DGATLTGIYRYT 102  
C3YRA3/4-216 IVPVNIQYGFHQYLPFPDG-M--SPFQAAMKDG--GYVHRTMQFE-DGASLTSNYRYT 102  
B1PND3/4-217 IVPVNIQYGFHQYLPFPDG-M--SPYQAAMKDG--GYVHRTMQFE-DGASLTSNYRYT 103  
B1PND2/5-217 IVPVNIQYGFHQYLPFPDG-M--SPYQAAMKDG--GYVHRTMQFE-DGASLTSNYRYT 102  
B1PNC9/4-217 IVPVNIQYGFHQYLPFPDG-M--SPYQAAMKDG--GYVHRTMQFE-DGASLTSNYRYT 103  
B1PNC6/5-217 IVPVNIQYGFHQYLPFPDG-M--SPYQAAMKDG--GYVHRTMQFE-DGASLTSNYRYT 102  
B1PNC7/4-220 IVPVNIQYGFHQYLPFPDG-M--SPYQAAMKDG--GYVHRTMQFE-DGASLTSNYRYT 103  
B1PND0/5-220 IVPVNIQYGFHQYLPFPDG-M--SPYQAAMKDG--GYVHRTMQFE-DGASLTSNYRYT 102  
B1PNC5/5-220 IVPVNIQYGFHQYLPFPDG-M--SPYQAAMKDG--GYVHRTMQFE-DGASLTSNYRYT 102  
B1PND1/5-217 IVPVNIQYGFHQYLPFPDG-M--SPYQAAMKDG--GYVHRTMQFE-DGASLTSNYRYT 102  
B1PND4/5-217 IVPVNIQYGFHQYLPFPDG-M--SPYQAAMKDG--GYVHRTMQFE-DGASLTSNYRYT 102  
B1PNC8/4-69 ILVPIQIGYGFHQYLPFPDG----- 66  
C3YRA0/8-104 MLVPHIGYGFHQYLPFPDGEM--SPYQAAMKDG--G-----AQ 91  
C3YKQ3/5-218 LMIPLHLYGYYQYLPFPDG-P--SPFQTSMLG--GYAVYRVDFE-DGGKLTTEFKYS 101  
C3YKQ7/5-217 LMIPLHLYGYYQYLPFPDG-P--SPFQTSMLG--GYAVYRVDFE-DGGKLTTEFKYS 101  
C3YKQ2/53-191 IGPNLGY-----QVHRVFKFE-DGGVLTVDQKT- 28  
A8QZ9/4-215 LIGPNLYGYYQYLPFPDG-A--SPFQTAITDG--GYQVHRVFKFE-DGGVLTVDQKT- 101  
C3YKQ9/5-215 LIGPNLYGYYQYLPFPDG-A--SPFQTAITDG--GYQVHRVFKFE-DGGVLTVDQKT- 100  
C3YKQ1/4-215 LIGPNLYGYYQYLPFPDG-A--SPFQTAITDG--GYQVHRVFKFE-DGGVLTVDQKT- 101  
C3ZLQ0/369-585 LVGPHLYGYYQYLPFPDG-P--SPFQAAMKDG--GYQVHRVFKFE-DGAVLTVQDET- 105  
C3YK10/4-218 LVGPHLYGYYQYLPFPDG-A--SPFQAAMKDG--GYQVHRVFKFE-DGAVLTVQDET- 104  
C3YKQ0/5-214 ILAPNLGYGYYQYLPFPDG-T--SPYQAAMKDG--VYQKHTFKFE-DGGVLTVDQKT- 100  
Q6WV10/1-215 LLSHILGYGYYHFATFPAGYE--NIYLHAMKNG--GYSNVRTERYE-DGGIISITFNRY 104  
Q6WV09/1-217 LLSHILGYGYYHFATFPAGYE--NIYLHAMKNG--GYSNVRTERYE-DGGIISITFNRY 104  
Q6WV11/1-215 LLSHIMZYGYYHFATFPAGYE--NVYLHAAKNG--GYTNTRTERYE-DGGIISITFNRY 104  
Q6WV12/1-213 LLSHVMGYGYYHFATFPAGYE--NPLHAAKNG--GYTNTRTERYE-DGGVLTVDQKT- 104  
Q6WV13/1-214 LLSHVMGYGYYHFATFPAGYE--NPLHAAKNG--GYTNTRTERYE-DGGVLTVDQKT- 104  
Q6WV08/1-214 LLSHVMGYGYYHFATFPAGYE--NPLHAAKNG--GYTNTRTERYE-DGGVLTVDQKT- 104  
Q2MHN7/1-215 LLSHVMGYGYYHFATFPAGYE--NPLHAAKNG--GYTNTRTERYE-DGGVLTVDQKT- 102

Q17106/5-229 -KFEGDT-----LVNRIELKIDFKEDGNILGHKMEYNSHNVYIMGDKPKNGIKVNFK 162  
Q17105/5-229 -KFEGDT-----LVNRIELKIDFKEDGNILGHKMEYNSHNVYIMGDKPKNGIKVNFK 162  
P42212/5-229 -KFEGDT-----LVNRIELKIDFKEDGNILGHKLEYNFNSHNVYIMADKQKNGIKVNFK 162  
Q6YQZ0/5-229 -KFEGDT-----LVNRIELTGTDFKEDGNILGNKMEYNSHNVYIMTDKAKNGIKVNFK 162  
Q8WTC5/5-229 -KFEGDT-----LVNRIELKGMDFKEDGNILGHKLEYNFNSHNVYIMPDKANGLKVNFK 162  
Q8WTC4/5-229 -KFEGDT-----LVNRIELKGMDFKEDGNILGHKLEYNFNSHNVYIMPDKANGLKVNFK 162  
Q8WTC9/5-229 -KFEGDT-----LVNRIELKGMDFKEDGNILGHKLEYNFNSHNVYIMPDKANGLKVNFK 162  
Q8WTD0/5-229 -KFEGDT-----LVNRIELKGMDFKEDGNILGHKLEYNFNSHNVYIMPDKANGLKVNFK 162  
Q8WTC8/5-229 -KFEGDT-----LVNRIELKGMDFKEDGNILGHKLEYNFNSHNVYIMPDKANGLKVNFK 162  
Q8WTC6/5-229 -KFEGDT-----LVNRIELKGMDFKEDGNILGHKLEYNFNSHNVYIMPDKANGLKVNFK 162  
Q8WP95/5-229 -KFEGDT-----LVNRIELKGMDFKEDGNILGHKLEYNFNSHNVYIMPDKANGLKVNFK 162  
Q8WTC7/5-229 -KFEGDT-----LVNRIELKGMDFKEDGNILGHKLEYNFNSHNVYIMPDKANGLKVNFK 162  
Q6RYS7/5-229 -TFENG-----VYNRVKNLQKQKDGKHLGKLEFNFTPHCLYIWDQANHLKSAFK 160  
Q6RYS6/39-258 -TMESGA-----IVNRINVKGTGFDKDGHCQKNESSP-PSYTYVYVPE--GEGIRIYR 157  
Q6RYS5/2-222 -TLESQA-----IYNRISVKGVGKDKGNVCKKRLHSSP-PQVSYVYVPE--GEGIRIYR 157  
Q6RYS4/5-225 -ELDGT-----VISRITVNCDFGQDPGPIKMDQL--VDILPTETHMFPHGSAVRQLCYI 159  
Q2TCH5/5-225 -ELDGT-----VVSRTVNCDFGQDPGPIKMDQL--VDILPTETHMFPHGSAVRQLCYI 159  
Q53UG7/1-221 -TMKKDG--SNCFVYEIFRFDGVNFPANGPVMQRKTKVKEP--STEKMY--VRDGLKGDVN 161  
Q53UG8/1-221 -TMKKDG--SNCFVYEIFRFDGVNFPANGPVMQRKTKVKEP--STEKMY--VRDGLKGDVN 161  
Q8MU48/1-218 -KMGD-----CFSYEIFRFDGVNFPANGPVMQRKTKVKEP--CTXEMY--VRDGLKGDVN 158  
A8CLW1/1-218 -TLEGD-----FVYKIRFDGVNFPANGPVMQRKTKVKEP--STEKLY--VRDGLKGDVN 158

Supplementary Material (ESI) for Molecular BioSystems  
This journal is (c) The Royal Society of Chemistry, 2011

B6CT24/1-218 -TLDGDC----FVYKIRFDGVNFPKSPVLQKKTQKWE-STEKLY--VRDGLLKGVDN 158  
Q5TL66/1-218 -TLDGDC----YIYEIRFDGVNFPANGPVMQKRTVKWE-STEKLY--VRDGLVKGVDN 158  
A8CLQ1/1-223 -TLLKDTDDSNFYFYKIRFDGVNFAANGPVMQKKTAKWE-STEKMY--VRDGLVKGVEV 163  
Q2LI65/1-219 -TLVGDVFSRS----EIRFEGVNFANGPVMQKKTQKWE-STEKMY--VRDGLVKGVDN 159  
A8CLW4/1-222 -TLSKDI--ANCFDYNIRFDGVNFPKSPVLQKKTQKWE-STEMMY--VRDGLVKGVDN 161  
B6CT25/4-224 -TLSKVI--DNCFHYNIRFDGVNFPKSPVLQKKTQKWE-STEIMY--VRDGLVKGVDN 161  
A3F207/1-221 -KLLKDE--ENCFHKNIRFDGVNFPANSPVMLKTTQKWE-STEKMY--ARDGVVKGVDN 161  
Q962P9/1-221 -TLMKGV--DDCFVYKIRFDGVNFPANGPVMQKKTQKWE-STEKMY--VRDGLVKGVDN 161  
Q7Z0W8/1-221 -TLMKGV--DDCFVYKIRFDGVNFPANGPVMQKKTQKWE-STEKMY--VRDGLVKGVDN 161  
Q66ND5/1-221 -TMMKGV--DDCFVYKIRFDGVNFPANGPVMQKKTQKWE-STEKMY--VRDGLVKGVDN 161  
Q66ND4/1-221 -TMMKGV--DDCFVYKIRFDGVNFPANGPVMQKKTQKWE-STEKMY--VRDGLVKGVDN 161  
Q66ND2/1-221 -TMMKGV--DDCFVYKIRFDGVNFPANGPVMQKKTQKWE-STEKMY--VRDGLVKGVDN 161  
A7UAL7/1-221 -TMMKGV--DDCFVYKIRFDGVNFPANGPVMQKKTQKWE-STEKMY--VRDGLVKGVDN 161  
Q7Z0W6/1-221 -TMMKGV--DDCFVYKIRFDGVNFPANGPVMQKKTQKWE-STEKMY--VRDGLVKGVDN 161  
A7UAL9/1-221 -TMMKGV--DDCFVYKIRFDGVNFPANGPVMQKKTQKWE-STEMMY--VRDGLVKGVDN 161  
Q875F2/8-228 -TMEGV--DDCFAYKIRFDGVNFPANGPVMQKKTQKWE-STEIMY--ARDGLVKGVDN 161  
Q7Z0W7/8-228 -TMMKGV--DDCFVYKIRFDGVNFPANGPVMQKKTQKWE-STEIMY--VRDGLVKGVDN 161  
Q8MU47/8-228 -TMMKGV--DDCFVYKIRFDGVNFPANGPVMQKKTQKWE-STEKMY--XRDGLVKGVDN 161  
Q95VT0/1-221 -TMMKGV--DDCFVYKIRFDGVNFPANGPVMQKKTQKWE-STEIMY--ARDGLVKGVDN 161  
A7UAL3/1-221 -TMMKGV--DDCFVYKIRFDGVNFPANGPVMQKKTQKWE-STEIMY--VRDGLVKGVDN 161  
A7UAL6/1-218 -KLEG--DDCFYKIRFDGVNFPANGPVMQKKTQKWE-STEIMY--VRDGLVKGVDN 158  
A7UAL8/1-218 -KLEG--DDCFYKIRFDGVNFPANGPVMQKKTQKWE-STEMMY--VRDGLVKGVDN 158  
A8CL52/1-219 -TLEGDT----FFNKVRFYGVNFPANGPVMQKKTQKWE-STEKMY--LRDGLVTDGIT 158  
Q816J8/1-219 -TLEGDT----FFNKVRFYGVNFPANGPVMQKKTQKWE-STEKMY--LRDGLVTDGIT 158  
A3F208/1-219 -TMEGDT----FVNKVRFYGVNFPANGPVMQKKTQKWE-STEKMY--VRDGLVTDGIT 158  
A8CLR7/1-219 -KMGVDT----FYNTVRFYGVNFPANGPVMQKKTQKWE-STEIMY--VRDGLVTDGIT 158  
Q556Z9/1-219 -TMEGDT----FVNKVRFHGVNFPANGPVMQKKTQKWE-STEKMY--VRDGLVTDGIT 158  
Q66PW1/5-223 -KMGVDT----FHNEVQFYGVNFPANGPVMQKKTQKWE-STEIMY--VRDGLVTDGIT 158  
Q875F1/1-219 -TMEGDC----FFNKVRFYGVNFPANGPVMQKKTQKWE-STEKMY--VRDGLVTDGIT 158  
Q7Z0W9/1-219 -TMEGDC----FFNKVRFYGVNFPANGPVMQKKTQKWE-STEKMY--VRDGLVTDGIT 158  
Q6USK3/1-219 -TMEGDC----FFNKVRFYGVNFPANGPVMQKKTQKWE-STEKMY--VRDGLVTDGIT 158  
A7UAL4/1-219 -TMEGDC----FFNKVRFYGVNFPANGPVMQKKTQKWE-STEKMY--VRDGLVTDGIT 158  
A7UAM0/1-219 -KMEGDC----FYKIRFDGVNFPKSPVMQKKTQKWE-STEKMY--VRDGLVKGDIS 158  
Q7Z0W5/1-218 -KLEGDC----FFYKIRFDGVNFPANGPVMQKKTQKWE-STEMMY--VRDGLVKGDIS 158  
Q95UA7/1-218 -KLEGDC----FFYKIRFDGVNFPANGPVMQKKTQKWE-STEMMY--VRDGLVKGDIS 158  
A7UAL1/1-218 -KLEGDC----FFYKIRFDGVNFPANGPVMQKKTQKWE-STEMMY--VRDGLVKGDIS 158  
A8CLP7/1-218 -KIEGDC----FTYDIFRHGVNFPANGPVMQKKTQKWE-STEMMY--VRDGLVGEVE 158  
A7UAL2/1-218 -KLEGDC----FFYKIRFDGVNFPANGPVMQKKTQKWE-STEMMY--VRDGLVKGDIS 158  
A7UAL5/1-218 -KMEGDC----FYKIRFDGVNFPANGPVMQKKTQKWE-STEKMY--VRDGLVKGDIS 158  
Q963F5/1-218 -KMEGDC----FYKIRFDGVNFPANGPVMQKKTQKWE-STEKMY--VRDGLVKGDIS 158  
Q7Z0W4/1-218 -RMEGDC----FYKIRFDGVNFPANGPVMQKKTQKWE-STEKMY--VRDGLVKGDIS 158  
Q66ND3/1-218 -RMEGDC----FYKIRFDGVNFPANGPVMQKKTQKWE-STEKMY--VRDGLVKGDIS 158  
Q2LI64/1-35 -----  
Q60I25/1-218 -SMRGDC----FFYDIFRHGVNFPANGPVMQKKTQKWE-STEKMY--VRDGLVKGDIS 158  
Q60I24/1-218 -SMRGDC----FFYDIFRHGVNFPANGPVMQKKTQKWE-STEKMY--VRDGLVKGDIS 158  
A8CLT2/1-218 -SMRGDC----FFYDIFRHGVNFPANGPVMQKKTQKWE-STEKMY--VRDGLVKGDIS 158  
B5BR3/1-218 -SMEGDC----FYKIRFDGVNFPANGPVMQKKTQKWE-STEMMY--VRDGLVKGDIS 158  
B6CT26/1-219 -SMEGDC----FYKIRFDGVNFPANGPVMQKKTQKWE-STEMMY--ARDGLVKGDIS 158  
Q9U6Y3/43-260 -SMEGDC----FYKIRFDGVNFPANGPVMQKKTQKWE-STEMMY--VRDGLVKGDIS 158  
Q876U0/1-218 -SLEGDC----FFQNVRFYGVNFPANGPVMQKKTQKWE-STEIMY--VRDGLVKGDIS 158  
Q875F0/7-229 -KMGVDE----FQYDIFRHGVNFPANGPVMQKKTQKWE-STEIMY--VRDGLVKGDIS 158  
Q875F3/6-223 -TMVGGC----FQYDIFRHGVNFPANGPVMQKKTQKWE-STEIMY--VRDGLVKGDIS 158  
Q66PW0/1-221 -SVVGDG----FNYEIHFMGANFPANGPVMQKKTQKWE-STEIMY--VRDGLVKGDIS 161  
Q8MU46/1-221 -SVVGDG----FNYEIHFMGANFPANGPVMQKKTQKWE-STEIMY--VRDGLVKGDIS 161  
Q875E9/1-221 -SVVGDG----FNYEIHFMGANFPANGPVMQKKTQKWE-STEIMY--VRDGLVKGDIS 161  
Q875E8/1-221 -RVVDGT----FNYDIFRHGVNFPANGPVMQKKTQKWE-STEIMY--VRDGLVKGDIS 161  
Q876T8/1-221 -SVVGDG----FNYDIFRHGVNFPANGPVMQKKTQKWE-STEIMY--VRDGLVKGDIS 161  
Q66PU5/1-220 -RLDQKEM---CFYDIFRHGVNFPANGPVMQKKTQKWE-STEIMY--VRDGLVKGDIS 160  
A8CL57/1-220 -RLDQKEM---CFYDIFRHGVNFPANGPVMQKKTQKWE-STEIMY--VRDGLVKGDIS 160  
Q8MAA2/34-254 -RLEEEER---RFVNVRFYGVNFPANGPVMQKKTQKWE-STEMMY--PRDGLVKGDIS 160  
Q8MAA1/12-234 -RLEEEER---RFVNVRFYGVNFPANGPVMQKKTQKWE-STEMMY--PRNGLLEGYDE 163  
Q66ND6/5-222 -SLTGNC----FNYDIKFTGLNFPANGPVMQKKTQKWE-STERLY--PRDGLVKGDIS 158  
Q9U6Y7/5-223 -SLTGNC----FNYDIKFTGLNFPANGPVMQKKTQKWE-STERLY--PRDGLVKGDIS 158  
Q553G7/6-223 -SLQDGC----FNYKVKRGTNFPANGPVMQKKTQKWE-SSERMY--PEDGALVKGDIS 158  
Q553G8/6-223 -SLQDGC----FNYKVKRGTNFPANGPVMQKKTQKWE-SSERMY--PEDGALVKGDIS 158  
Q2LI66/5-222 -SLQDGC----FNYKVKRGTNFPANGPVMQKKTQKWE-STERLY--PRDGLVKGDIS 158  
Q66ND8/5-222 -SLQDGC----FNYKVKRGTNFPANGPVMQKKTQKWE-STERLY--PRDGLVKGDIS 158  
Q66ND7/5-222 -SLQDGC----FNYKVKRGTNFPANGPVMQKKTQKWE-STERLY--PRDGLVKGDIS 158  
Q9U6Y8/5-222 -SLQDGC----FNYKVKRGTNFPANGPVMQKKTQKWE-STERLY--PRDGLVKGDIS 158  
Q6K6F85/5-222 -SLQDGC----FNYKVKRGTNFPANGPVMQKKTQKWE-STERLY--PRDGLVKGDIS 158  
Q2W674/7-224 -SLQDGC----FNYKVKRGTNFPANGPVMQKKTQKWE-STERLY--PRDGLVKGDIS 158  
Q9GT37/5-223 -SLQDGC----FNYKVKRGTNFPANGPVMQKKTQKWE-STERLY--PRDGLVKGDIS 158  
A8CLM7/1-218 -SIQGNC----FYNVVKISGLNFPANGPVMQKKTQKWE-STERLY--ARDGMLVKGDIS 158  
A8CLM1/1-218 -SIQGNC----FYNVVKISGLNFPANGPVMQKKTQKWE-STERLY--ARDGMLVKGDIS 158  
Q1JU63/2-219 -SIQGNC----FYNVVKISGLNFPANGPVMQKKTQKWE-STERLY--ARDGMLVKGDIS 158  
Q1JV71/2-219 -SIQGNC----FYNVVKISGLNFPANGPVMQKKTQKWE-STERLY--ARDGMLVKGDIS 158  
Q1JV72/2-219 -SIQGNC----FYNVVKISGLNFPANGPVMQKKTQKWE-STERLY--ARDGMLVKGDIS 158  
Q1JV70/2-219 -SIQGNC----FYNVVKISGLNFPANGPVMQKKTQKWE-STERLY--ARDGMLVKGDIS 158  
B5T1L1/1-218 -SIQGNC----FNYHVKFSGLNFPANGPVMQKKTQKWE-STERLY--ARDGMLVKGDIS 158  
A8CLV6/1-218 -SIQGNC----FNYHVKFSGLNFPANGPVMQKKTQKWE-STERLY--ARDGMLVKGDIS 158  
Q66PW0/1-218 -SIQGNC----FNYHVKFSGLNFPANGPVMQKKTQKWE-STERLY--ARDGMLVKGDIS 158  
Q66PU8/1-218 -SIQGNC----FNYHVKFSGLNFPANGPVMQKKTQKWE-STERLY--ARDGMLVKGDIS 158  
Q95P04/1-218 -SIQGNC----FNYHVKFSGLNFPANGPVMQKKTQKWE-STERLY--ARDGMLVKGDIS 158

Supplementary Material (ESI) for Molecular BioSystems  
This journal is (c) The Royal Society of Chemistry, 2011

A8CLL3/1-218 -SIQGN-----FIYNVKSGLNFPSPGVMQKKTQGWE-NTERLL--ARDGMLIGNNF 158  
Q66P1/1-218 -SIQGN-----FIYHVKFSGVNFPNPGVMQKKTQGWE-NTERLF--ARDGMLIGNNF 158  
Q66P9/1-218 -SIQGN-----FIYHVKFSGLNFPNPGVMQKKTQGWE-NTERLF--ARDGVLIGNNF 158  
P83690/1-218 -SIQGN-----FTYHVKFSGLNFPNPGVMQKKTQGWE-HSERLF--ARGGMLIGNNF 158  
A8CLN8/6-226 -RLDGD5-----FIYEVRFLGVNFPDRGPMQKKTTRGDW-STERLY--ECGGWRQGDVH 158  
B6CTZ7/1-220 INLQENC-----FIYDVKFHGVNLPDGPVMQKTIAGWE-SVETLY--VRDGLMKSDTA 160  
Q9U6Y5/5-228 VSVEENC-----MYHESKFGVGNFPADGPVMKKMTDNWE-SCEKIIPVQKQILKGDVS 162  
Q9U6Y4/5-228 VSVKENC-----IYHKSIFNGMNFADGPVMKKMTTWEA-SCEKIMPVQKQILKGDVS 162  
Q8T4U4/5-228 VNVRENC-----IYHSTFYGVNFPADGPVMKKMTTWE-SCEKIIPINSQILKGDVS 162  
B2ZAG2/5-226 V--KENC-----IHHSTFYGVNFPDGPVMKKVTYVWE-SCEKIIPSPQKQILKGDVS 160  
Q69ZV6/5-228 VSVEENC-----FYHNSKFHGVNFPADGPVMKKMTTWE-SCEKIIPVPRQKQILKGDIA 162  
B5LIN1/1-161 VSVEENY-----FYHNSKFHGVNFPADGPVMKKMTTWE-SCEKIIPVPRQKQILKGDIA 99  
B5TL1L5/5-228 VSVEENC-----FYHNSKFHGVNFPADGPVMKKMTTWE-SCEKIIPVPRQKQILKGDIA 162  
Q66PV2/5-228 VSVEENC-----FYHNSKFHGVNFPADGPVMKKMTTWE-SCEKIIPVPRQKQILKGDIA 162  
Q86LC2/5-228 LSVEERC-----FYHESKFGVGNFPADGPVMKKMTTWE-SCEKIIPVPRQKQILKGDVS 162  
B2ZAG1/5-228 LSQKEC-----FHHVSRFYGVNFPADGPVMKKMTDWE-STEKIIPVPSQKQILKGDAS 162  
A8CLN4/5-231 VSVEENC-----FYHESKFGVGNFPADGPVMKKMTTWE-SCEKIIPVPRQKQILKGDVT 163  
A8CLV1/5-230 VSVEENC-----FYHESKFGVGNFPADGPVMKKMTTWE-SCEKIIPVPRQKQILKGDVT 162  
A8CLU7/1-223 LSSDKS-----FEHKSFLGVNFPADGPVMKKTETTWE-SCEKMT--PNGMTLIGDVT 160  
A8CLP2/5-228 LSADKKS-----FEHKSFLGVNFPADGPVMKKTETTWE-SCEKMT--PNGMTLIGDVT 161  
B6CTZ2/5-226 LSDDKAS-----FHHKSKFGVGNFPDGPVMKKTETDWE-SCEKMT--PSGKTLKGDVI 160  
Q2VTM9/5-219 LD--KNC-----FVHKSIFHGVNFPANGPMQKKTILNWE-SSELIT--AGDGILKGDVT 158  
Q1ALD3/5-219 LD--KDC-----FHHSTFHVGNFPANGPMQKKTILNWE-SSELIT--PCDGILKGDVT 158  
Q1ALD5/5-219 LE--KNC-----FVHQSFLGVNFPANGPMQKKTILNWE-SSELIT--PCDGILKGDVT 158  
Q1ALD4/5-219 LD--KNG-----FVHNSIFHGVNFPANGPMKKTGGVNE-SSEKIT--ACDGILKGDVT 158  
Q09HR5/5-219 LN--KTG-----FVHKSIFHGVNFPANGPMQKKTIVNWE-STEKIT--ACDGLTKGDVT 158  
Q2VTM8/5-219 LT--KNC-----FVHNSIFHGVNFPANGPMQKKTILNWE-SSEKIT--PFEGNLKGDVT 158  
A8CLU1/1-218 LDSASNC-----FHHKSKFGVGNFPDGPVMKKTETTWE-SSEKIT--VRDGLKGDVT 159  
Q9U6Y6/5-224 LKG--NC-----FEHKSIFHGVNFPADGPVMAKKTGWDP-SFEKMT--VCDGILKGDVT 160  
A8CLT7/5-224 LKG--NC-----FVHKSIFHGVNFPADGPVMKKTGWDP-SFEKMT--VCDGILKGDVT 158  
Q66N1/5-220 LEG--NW-----FKHSMFHGVNFPANGPMQKRTIGWD-SFEKMT--VSNILKRGDVT 158  
Q66PV5/5-226 LER--DC-----FHHKSIYHGVNFPADGPVMKKTIGWD-AFEKMT--VSKDVLKGDVT 160  
B5TL1L2/5-226 LER--DC-----FHHKSIYHGVNFPADGPVMKKTIGWD-AFEKMT--VSKDVLKGDVT 160  
Q66PV3/5-226 LER--DC-----FHHKSIYHGVNFPADGPVMKKTIGWD-AFEKMT--VSKDVLKGDVT 160  
B5TL1L0/5-226 LER--DC-----FHHKSIYHGVNFPADGPVMKKTIGWD-AFEKMT--VSKDVLKGDVT 160  
Q66PV4/5-226 LER--DC-----FHHKSIYHGVNFPADGPVMKKTIGWD-AFEKMT--VSKDVLKGDVT 160  
B5LIN0/5-226 LER--DC-----FHHKSIYHGVNFPADGPVMKKTIGWD-AFEKMT--VSKDVLKGDVT 160  
B5TL1L3/5-226 LEG--DC-----FHHKSIYHGVNFPADGPVMKKTIGWD-SFEKMT--VSKDVLKGDVT 160  
B5TL1L4/5-226 LEG--NC-----FHHKSIYHGVNFPADGPVMKKTIGWD-SFEKMT--VSKDVLKGDVT 160  
Q66PV7/5-226 LEG--NC-----FHHKSIYHGVNFPADGPVMEKKTIGWD-SFEKMT--VSKEVLKGDVT 160  
A8CLY3/5-226 LEG--NC-----FHHKSIYHGVNFPADGPVMKKTIGWD-SFEKMT--VSKEVLKGDVT 160  
Q66PV8/5-226 LEG--NC-----FHHKSIYHGVNFPADGPVMKKTIGWD-SFEKMT--VSKEVLKGDVT 160  
Q66PV9/5-226 LEG--NC-----FHHKSIYHGVNFPADGPVMKKTIGWD-SFEKMT--VSKEVLKGDVT 160  
A8CLX9/5-226 LEG--NC-----FHHKSIYHGVNFPADGPVMKKTIGWD-SFEKMT--VSKEVLKGDVT 160  
B6CTZ3/5-226 LEG--NC-----FHHKSIYHGVNFPADGPVMKKTIGWD-SFEKMT--VSKEVLKGDVT 160  
Q6I7B1/6-227 LEG--NC-----FHHKSIYHGVNFPADGPVMKKTIGWD-SFEKMT--VSKEVLKGDVT 160  
Q66PV6/5-226 LEG--NC-----FHHKSIYHGVNFPADGPVMTKKTIGWD-AFEKMT--GFNEVLKGDVT 160  
Q86LV8/1-213 L--TGSV-----FEHKSIFHGVNFPANGPVIQKKTILGWET-STEKMA--ANDGSVQGYDT 156  
Q86LV7/1-213 L--TGNV-----FEHKSIFHGVNFPANGPVIQKKTILGWET-STEKMA--ANDGSVQGYDT 156  
A8CLR1/5-220 L--EGDC-----FEHECEFVGVNFPANGPMQKKTQGWE-STEKMT--AHGKVVQGNVP 160  
Q6R8F5/5-223 L--NGNC-----FVHQSIFHGVNFPADGPVMQKKTIVGWE-STEKMI--VRDGLKGDVT 158  
Q6R8F4/1-219 LK--GNW-----FVHQSIFHGVNFPADGPVMQKKTIVGWE-STEKMI--VRDGLKGDVT 158  
Q6R8F3/5-220 IE--KDG-----FKHRSKFGVGNFPNPGVMQKKTTRGWE-STEKMT--VRDGLKGHVT 159  
Q6I7B2/2-218 L--RGNT-----FHHKSKFTGVNFPADGPTMQNSQSDWE-STEKIT--ASDGLKGDVT 160  
A7VMR3/2-218 L--RGNT-----FHHKSKFTGVNFPADGPTMQNSQSDWE-STEKIT--ASDGLKGDVT 160  
Q6I7B4/1-210 L--RGNC-----FEHKSIFHGVNFPADGPVMQNSDWE-STEKIT--TYDGLKGDVT 153  
Q6I7B3/1-217 L--RGNC-----FEHKSIFHGVNFPADGPVMQNSDWE-STEKIT--TCDGLKGDVT 160  
A8CLQ6/5-221 L--KGD-----FEHKSIFHGVNFPADGPVMQKKTILNWE-STEKIT--VSDGLKGDVT 160  
A8CLW9/4-223 L--IGNR-----FEHKSIFHGVNFPADGPVMQKKTILNWE-SSEKIT--PRDGLKGYVP 158  
Q9S86/2-220 -SLEGNC-----LHYKVKVLTGNFPADGPVMKKTISGGWE-CTEIVY--QDNGVLRGRNV 158  
Q9S11/2-220 -SLEGNC-----LHYKVKVLTGNFPADGPVMKKTISGGWE-CTEIVY--QDNGVLRGRNV 158  
Q8MU45/2-220 -SLEGNC-----PIYKVKVLTGNFPASVPVMMKVSSGWE-STEIVY--QDNGVLRGRNV 158  
Q9S85/2-220 -SLEGNC-----LHYKVKVLTGNFPADGPVMKKTISGGWE-CTEVVY--PENGVLKGRNV 158  
ASYTR7/2-222 -SLDGD-----LHYKVKILGNFPADGPVMQKKAERWE-ATEIVY--EVDGVLKRGSL 158  
Q9GZ28/2-222 -SLDGD-----LHYKVKILGNFPADGPVMQKKAERWE-ATEIVY--EVDGVLKRGSL 158  
ASYTR8/2-222 -SLDGD-----LHYKVKILGNFPADGPVMQKKAERWE-ATEIVY--EVDGVLKRGSL 158  
Q9GP15/2-222 -SLDGD-----LHYKVKILGNFPADGPVMQKKAERWE-ATEILY--EVDGVLKRGSL 158  
Q2VFP3/2-221 -SLQGNC-----FIKVNIVGANFPANGPMQKKTAGWE-CVEMLY--PRDGLKCGQL 158  
A0AQ7/2-222 -KLDGNC-----LVYNIKILGNCNFPNPGVMQKKTQGWE-CCEMRY--TRDGLKCGQL 158  
A0AQ8/2-222 -KLDGNC-----LVYNIKILGNCNFPNPGVMQKKTQGWE-CCEMRY--TRDGLKCGQL 158  
Q8T5F8/2-222 -SLEDGC-----LHYHAKVGTGNFPNPGVMQKKTAGWE-NTEMLY--PADGGLRGYSQ 158  
Q86LV4/2-220 -SLEDGC-----IICNIKVHGTNFPADGPVMQKKTIVGWE-STETVI--PRDGLKRDV 158  
Q5QIU5/2-220 -SLKGD-----IICNIKVHGTNFPADGPVMQKKTIVGWE-STETVI--PRDGLKRDV 158  
Q8T6T9/2-220 -SLEDGC-----IICNIKVHGTNFPADGPVMQKKTIVGWE-STETVI--PRDGLKRDV 158  
Q8T5E7/2-220 -SLKGD-----IICNIKVHGTNFPADGPVMQKKTIVGWE-STETVI--PQDGGIVAARS 159  
ASYTR6/2-219 -SLQGD-----IICNVKVLGNFPANGPMQKKTIVGWE-STETVI--PRDGLKLLRDT 158  
Q9GP16/2-219 -SLQGD-----IICNVKVLGNFPANGPMQKKTIVGWE-STETVI--PRDGLKLLRDT 158  
Q5ZQ06/2-221 -TLKGD-----ITTYSEVGT--FPPNGVMKKTILNWE-SCENVI--PRDGLIMYDN 157  
B9UPG6/1-219 -TFKDN-----VYGDVWALGVNFPNPGVMKNEIVMEP-AEETLI--PQNGVLKGF 158  
Q5ZQ05/1-219 -TYKDK-----LHGDVWALGVNFPNPGVMKNEIVMEP-AEETLI--AKNGVLKGF 158  
Q7Z168/1-218 -TYKDN-----LHGDVWAVGVNFPNPGVMKNEIVMEP-TEETFT--PKNGLKGF 157  
Q9BLZ0/8-225 -SLEDD-----FHHKVEYRGVGNFPNPGVMQKKTILGWE-SFEVY--MNSGVLKGEVD 158  
Q9BLY9/8-225 -NLIED-----FVYRVEYKGSNFPDGPVMQKKTILGWE-SFEAMY--MNGVLKGEVI 158

Q963I9/5-223 -SLEDGK----FIVNVDFKAKDLRRMGPMVQDDIVGMQP--SYESMY--TNVTSVIGECI 158  
A8CLX6/5-222 -SLKGN-----LVHKTNFQGNFIDGPMVQKRTLWEP--TSEKMT--PCDGIIGDITI 158  
A753R2/57-279 LKDG-----LHYHTNFHGINLKPDPVPMQKRTMGWLP--SVETNI--PRRDTLLGDIN 159  
A7RGQ5/1-174 LKNR-----LHYHTTFHGINLNPKEPLMQRKRTMGWLP--SVETNI--PRGDTLVGDIN 147  
A751H5/1-224 LDKDG-----LHYHMTFQGINLDPNGPMVKMTMGWLP--SVETNI--PRGTLVGDIN 160  
A751H3/1-82 HQNGS-----LHYHVTFHGINPKTDGPMVQKITMGWSP--SVE----- 82  
B1PNC2/5-218 YEGSHIKG-----EFQVNGTGFPADGPMVMTNSLTTADWCVTMPLY--PNDKTIISTFD 152  
B1PNC0/4-217 YEGSHIKG-----EFQVIGTGFPADGPMVMTNSLTTADWCVTMPLY--PNDKTIISTFD 153  
B1PNC1/5-218 YEGSHIKG-----EFQVIGTGFPADGPMVMTNSLTTADWCVTMPLY--PNDKTIISTFD 152  
B1PNC4/5-218 YEGSHIKG-----EFQVIGTGFPADGPMVMTNSLTTADWCVTMPLY--PNDKTIISTFD 152  
B1PNC4/5-218 YEGSHIKG-----EFQVIGTGFPADGPMVMTNSLTTADWCVTMPLY--PNDKTIISTFD 152  
C3YR99/48-261 YEGSHIKG-----EFQVIGTGFPADGPMVMTNSLTTADWCVTMPLY--PNDKTIISTFD 154  
B1PNC3/4-217 YEGTHIKG-----EFQVIGTGFPADGPMVMTNSLTTADWCVTMPLY--PNDKTIISTFD 154  
B1PNB8/5-217 YEGTHIKG-----EFQVIGTGFPADGPMVMTNSLTTADWCVTMPLY--PNDKTIISTFD 153  
B1PNB9/4-216 YEGTHIKG-----EFQVIGTGFPADGPMVMTNSLTTADWCVTMPLY--PNDKTIISTFD 154  
C3YRA1/51-267 YEGSHIKG-----EFQVIGTGFPADGPMVMTNSLTTADWCVTMPLY--PNDKTIISTFD 154  
C3YRA2/11-223 YEGSHIKG-----EFQVIGTGFPADGPMVMTNSLTTADWCVTMPLY--PNDKTIISTFD 153  
B1PND7/4-187 YEGSHIKG-----EFQVIGTGFPADGPMVMTNSLTTADWCVTMPLY--PNDKTIISTFD 154  
B1PND6/5-189 YEGSHIKG-----EFQVIGTGFPADGPMVMTNSLTTADWCVTMPLY--PNDKTIISTFD 152  
B1PND8/4-184 YEGSHIKG-----EFQVIGTGFPADGPMVMTNSLTTADWCVTMPLY--PNDKTIISTFD 154  
B1PND5/5-186 YEGSHIKG-----EFQVIGTGFPADGPMVMTNSLTTADWCVTMPLY--PNDKTIISTFD 153  
C3YRA3/4-216 YDGGHIK-----EFHVGSGFLDGGPMVTKSLTAVDWSVATMLF--PNDTIVSTID 153  
B1PND3/4-217 YNGNHIK-----EFRLTSGFPPADGPMVMTNSLTTADWCVDKLLY--PDNTIIGKFD 154  
B1PND2/5-217 YNGNHIK-----EFRLTSGFPPADGPMVMTNSLTTADWCVDKLLY--PDNTIIGKFD 153  
B1PNC9/4-217 YKGNHIK-----EFRLTSGFPPADGPMVMTNSLTTADWCVDKLLY--PDNTIIGKFD 154  
B1PNC6/5-217 YKGNHIK-----EFRLTSGFPPADGPMVMTNSLTTADWCVDKLLY--PDNTIIGKFD 153  
B1PNC7/4-220 YKGNHIK-----EFRLTSGFPPADGPMVMTNSLTTADWCVDKLLY--PDNTIIGKFD 154  
B1PND0/5-220 YKGNHIK-----EFRLTSGFPPADGPMVMTNSLTTADWCVDKLLY--PDNTIIGKFD 153  
B1PNC5/5-220 YKGNHIK-----EFRLTSGFPPADGPMVMTNSLTTADWCVDKLLY--PDNTIIGKFD 153  
B1PND1/5-217 YNGNHIK-----EFRLTSGFPPADGPMVMTNSLTTADWCVDKLLY--PDNTIIGKFD 153  
B1PND4/5-217 YNGNHIK-----EFRLTSGFPPADGPMVMTNSLTTADWCVDKLLY--PDNTIIGKFD 153  
B1PNC8/4-69 ----- 97  
C3YRA0/8-104 YDGNHE----- 97  
C3YKQ3/5-218 YEGSHIKA-----DMKLMGSGFPDDGPMVMTNSLQIVDQDGCVSCKTY--LNNNTIVDSFD 152  
C3YK7/5-217 YEGTHIKS-----DFKLMGSGFPDDGPMVMTNSLQIVDQDGCVSCKTY--LNDNTIVDSFD 152  
C3YKQ2/53-191 YEGGKIKG-----EFQLIGSGFPAGGPMVMSGGLTTLDRSVAKLQC--SDDCTITGTNN 79  
A8QV29/4-215 YEGGKIKG-----EFQLIGSGFPAGGPMVMSGGLTTLDRSVAKLQC--SDDCTITGTNN 152  
C3YK9/5-215 YEGGKIKG-----EFQLIGSGFPAGGPMVMSGGLTTLDRSVAKLQC--SDDCTITGTNN 151  
C3YKQ1/4-215 YEGGKIKG-----EFQLIGSGFPAGGPMVMSGGLTTLDRSVAKLQC--SDDCTITGTNN 152  
C3ZL00/369-585 YSGGKIQ-----EFHLVSGFCPPDDSPVMTNLTGLDRSVAKLQC--VSDDKLAEFVD 156  
C3YK10/4-218 YSGGKIQ-----EFHLVSGFCPPDDSPVMTNLTGLDRSVAKLQC--VSDDKLAEFVD 155  
C3YKQ0/5-214 YSGNKIKG-----EFHVGSGFPDDGPMVMTNSLQHDHNVRLMV--LGDKTIIGSDNM 151  
Q6W10/1-215 YEGNKIG-----DFKVVGTGFPPTNSLIFTDKIISNPTCEMFY--KADNVLVNAVY 155  
Q6W09/1-217 YEGNKIG-----DFKVVGTGFPPTNSLIFTDKIISNPTCEMFY--KADNVLVNAVY 155  
Q6W11/1-215 YEGNKIG-----DFKVVGTGFPPTNSLIFTDKIISNPTCEMFY--KADNVLVNAVY 155  
Q6W12/1-213 YEGNKIG-----DFKVVGTGFPPTNSLIFTDKIISNPTCEMFY--KADNVLVNAVY 155  
Q6W13/1-214 YEGNKIG-----DFKVVGTGFPPTNSLIFTDKIISNPTCEMFY--KADNVLVNAVY 155  
Q6W08/1-214 YEGNKIG-----DFKVVGTGFPPTNSLIFTDKIISNPTCEMFY--KADNVLVNAVY 155  
Q2MH7/1-215 YEFNKIIG-----DVEICIGHFSPQSPFKDITVKSCTPVDLMLP--MSGNIIASSYA 153  
  
Q17106/5-229 IRHNKIDG---SVQLADHYQNTPIGD--GPVLLPDN--HYLSTQSALSQDP--HGKRDHML 216  
Q17105/5-229 IRHNKIDG---SVQLADHYQNTPIGD--GPVLLPDN--HYLSTQSALSQDP--NEKRDHML 216  
P42212/5-229 IRHNIEDG---SVQLADHYQNTPIGD--GPVLLPDN--HYLSTQSALSQDP--NEKRDHML 216  
Q6Y20/5-229 IRHNIEDG---SVQLADHYQNTPIGD--GPVLLPDN--HYLSTQSALSQDP--NEKRDHMY 216  
Q8WT5/5-229 IRHNIEGG---GVQLADHYQTNVPLGD--GPVLIPIIN--HYLSYQTAISKDR--NETRDHMF 216  
Q8WT4/5-229 IRHNIEGG---GVQLADHYQTNVPLGD--GPVLIPIIN--HYLSYQTAISKDR--NETRDHMF 216  
Q8WT9/5-229 IRHNIEGG---GVQLADHYQTNVPLGD--GPVLIPIIN--HYLSYQTAISKDR--NETRDHMF 216  
Q8WT0/5-229 IRHNIEGG---GVQLADHYQTNVPLGD--GPVLIPIIN--HYLSYQTAISKDR--NETRDHMF 216  
Q8WT8/5-229 IRHNIEGG---GVQLADHYQTNVPLGD--GPVLIPIIN--HYLSYQTAISKDR--NETRDHMF 216  
Q8WT6/5-229 IRHNIEGG---GVQLADHYQTNVPLGD--GPVLIPIIN--HYLSYQTAISKDR--NETRDHMF 216  
Q8WP95/5-229 IRHNIEGG---GVQLADHYQTNVPLGD--GPVLIPIIN--HYLSYQTAISKDR--NETRDHMF 216  
Q8WT7/5-229 IRHNIEGG---GVQLADHYQTNVPLGD--GPVLIPIIN--HYLSYQTAISKDR--NETRDHMF 216  
Q6RY57/5-229 IMHEITGSKE--DFIVADHTQMNTPIGG--GPVHVPEY--HHITYHTVLSKDV--TDHRDNMSL 216  
Q6RY56/39-258 NIYPTKDG---HYVADTQVNRPIRAQGTSAIPTY--HHIKSKVDLSTDP--EENKDHIII 212  
Q6RY55/2-222 NIYPTKDG---GYVADTQVNRPIKAEGKSAIPKY--HYIKSKIDLSTDP--NERKDHIII 212  
Q6RY54/5-225 GFTTADGG---LMMSHFDSKLTFNRSRAIKIPGP--HFVTIITKQMDT--SDKRDHVCQ 212  
Q2TCH5/5-225 GFTTADGG---LMMGHFDSKMTFNRSRAIEIPGP--HFVTIITKQMDT--SDKRDHVCQ 212  
Q53UG7/1-221 MALLLQGG---GHYRCDFRTTYKAK--KVV--QLPDY--HFVDHRIEIVSHD--KDYNNVKL 212  
Q53UG8/1-221 MALLLQGG---GHYRCDFRTTYKAK--KVV--QLPDY--HFVDHRIEIVSHD--KDYNNVKL 212  
Q8MU48/1-218 MALLLEGG---GHFRCDLKTYYKAK--KVV--QMPDY--HFVNHRIEIVSHD--EDYNNVKL 209  
A8CLW1/1-218 MALLLEGG---GHFRCDFKTTYKAK--KVV--QLPDY--HFVDHRIEIVSHD--KDYNNVKL 209  
B6CTZ4/1-218 MALLLEGG---GHYRCDFKTTYKAK--KVV--QLPDY--HFVDHRIEIVSHD--KDYNNVKL 209  
Q5TL66/1-218 MALLLEGG---GHYRCDFKTTYKAK--KVV--QLPDY--HFVDHRIEIVSHD--KDYNNVKL 209  
A8CLQ1/1-223 MALLLEGG---GHYRCDFKTTYKAK--KVV--RPSY--HFVDHRIEIVSHD--KDYNNVKL 214  
Q2LI65/1-219 MALLLEGG---GHYRCDFKTTYKAK--KVV--QLPEY--HFVDHRIEIVSHD--RDYNNVKL 210  
A8CLW4/1-222 MALLLEGG---AGHYRCDFKTTYKAK--KAV--KLPDY--HFVDHRIEIVSHD--KDYNNVKL 213  
B6CTZ5/4-224 MALLLEGG---GHYRCDFKTTYKAK--KVV--ELPDY--HFVDHRIEIVSHD--KDYNNVKL 212  
A3F207/1-221 MALLLQGG---GHYRCDFKTTYKAK--KVV--PLPDY--HFVDHRIEIVSHD--KDYNNVKL 212  
Q962P9/1-221 MALLLEGG---GHYRCDFKTTYKAK--KVV--QLPDY--HFVDHRIEIVSHD--KDYNNVKL 212  
Q7Z0W8/1-221 MALLLEGG---GHYRCDFKTTYKAK--KVV--QLPDY--HFVDHRIEIVSHD--KDYNNVKL 212  
Q66ND5/1-221 MALLLEGG---GHYRCDFKTTYKAK--KVV--QLPDY--HFVDHRIEIVSHD--KDYNNVKL 212  
Q66ND4/1-221 MALLLEGG---GHYRCDFKTTYKAK--KVV--QLPDY--HFVDHRIEIVSHD--KDYNNVKL 212  
Q66ND2/1-221 MALLLEGG---GHYRCDFKTTYKAK--KVV--QLPDY--HFVDHRIEIVSHD--KDYNNVKL 212

|               |                                                               |       |
|---------------|---------------------------------------------------------------|-------|
| A7UAL7/1-221  | MALLLEGG---GHYRCDFKTTYKAK-KVV--QLPDY-HFVDHRIEIVSHD--KDYNKVKL  | 212   |
| Q7Z0W6/1-221  | MALLLEGG---GHYRCDFKTTYKAK-KVV--QLPDY-HFVDHRIEIVSHD--KDYNKVKL  | 212   |
| A7UAL9/1-221  | MALLLEGG---GHYRCDFKTTYKAK-KVV--QLPDY-HFVDHRIEIVSHD--KDYNKVKL  | 212   |
| Q8T5F2/8-228  | MALLLEGG---GHYRCDFKTTYKAK-KVV--RLPDY-HFVDHRIEIVSHD--KDYNKVKL  | 212   |
| Q7Z0W7/8-228  | MALLLEGG---GHYRCDFKTTYKAK-KVV--RLPDY-HFVDHRIEIVSHD--KDYNKVKL  | 212   |
| Q8MU47/8-228  | MALLLEGG---GHYRXDXKTTYRAK-KVV--QLPDY-HFVDHRIEIVSHD--KDYNKVKL  | 212   |
| Q95VT0/1-221  | MALLLEGG---GHYRCDFKTTYKAK-KVV--RLPDY-HFVDHRIEIVSHD--KDYNKVKL  | 212   |
| A7UAL3/1-221  | MALLLEGG---GHYRCDFKTTYKAK-KVV--RLPDY-HFVDHRIEIVSHD--KDYNKVKL  | 212   |
| A7UAL6/1-218  | MALLLEGG---GHYRCDFKTTYKAK-KFV--QLPDY-HFVDHRIEIVSHD--KDYNKVKL  | 209   |
| A7UAL8/1-218  | MALLLEGG---GHYRCDFKTTYKAK-KVV--QLPDY-HFVDHRIEIVSHD--KDYNKVKL  | 209   |
| A8CL52/1-219  | MALLLEGG---VHYRCDFRTTYKSRQEGV--KLPY-HFVDHCISIVSHD--KDYTKVKL   | 210   |
| Q8T6J8/1-219  | MALLLEGG---VHYRCDFRTTYKSRQEGV--KLPY-HFVDHCISIVSHD--KDYTKVKL   | 210   |
| A3F208/1-219  | MALLLEGG---VHYRCDFRTTYKSRQEGV--KLPY-HFVDHCISIVSHD--KDYTKVKL   | 210   |
| A8CLR7/1-219  | MALLLEGG---VHYRCDFRTTYKSRQEGV--KLPY-HFVDHCISIVSHD--KDYTKVKL   | 210   |
| Q55629/1-219  | MALLLEGG---VHYRCDFRTTYKSRQEGV--KLPY-HFVDHCISIVSHD--KDYTKVKL   | 210   |
| Q66PW1/5-223  | MALLLEGG---VHYRCDFRTTYKSRQEGV--KLPY-HFVDHCISIVSHD--KDYTKVKL   | 210   |
| Q8T5F1/1-219  | MALLLEGG---GHYRCDFRTTYKSRQEGV--KLPY-HFVDHCISIVSHD--KDYTKVKL   | 210   |
| Q7Z0W9/1-219  | MALLLEGG---GHYRCDFRTTYKSRQEGV--KLPY-HFVDHCISIVSHD--KDYTKVKL   | 210   |
| Q6USK3/1-219  | MALLLEGG---GHYRCDFRTTYKSRQEGV--KLPY-HFVDHCISIVSHD--KDYTKVKL   | 210   |
| A7UAL4/1-219  | MALLLEGG---VHYRCDFRTTYKSRQEGV--KLPY-HFVDHCISIVSHD--KDYTKVKL   | 210   |
| A7UAM0/1-219  | MALLLEGG---VHYRCDFRTTYKSRQEGV--KLPY-HFVDHCISIVSHD--KDYTKVKL   | 210   |
| Q7Z0W5/1-218  | MALLLEGG---VHYRCDFRTTYKSRQEGV--KLPY-HFVDHCISIVSHD--KDYTKVKL   | 210   |
| Q95UA7/1-218  | MALLLEGG---VHYRCDFRTTYKSRQEGV--KLPY-HFVDHCISIVSHD--KDYTKVKL   | 210   |
| A7UAL1/1-218  | MALLLEGG---VHYRCDFRTTYKSRQEGV--KLPY-HFVDHCISIVSHD--KDYTKVKL   | 210   |
| A8CLP7/1-218  | MALLLEGG---VHYRCDFRTTYKSRQEGV--KLPY-HFVDHCISIVSHD--KDYTKVKL   | 210   |
| A7UAL2/1-218  | MALLLEGG---VHYRCDFRTTYKSRQEGV--KLPY-HFVDHCISIVSHD--KDYTKVKL   | 210   |
| A7UAL5/1-218  | MALLLEGG---VHYRCDFRTTYKSRQEGV--KLPY-HFVDHCISIVSHD--KDYTKVKL   | 210   |
| Q963F5/1-218  | MALLLEGG---VHYRCDFRTTYKSRQEGV--KLPY-HFVDHCISIVSHD--KDYTKVKL   | 210   |
| Q7Z0W4/1-218  | MALLLEGG---VHYRCDFRTTYKSRQEGV--KLPY-HFVDHCISIVSHD--KDYTKVKL   | 210   |
| Q66ND3/1-218  | MALLLEGG---VHYRCDFRTTYKSRQEGV--KLPY-HFVDHCISIVSHD--KDYTKVKL   | 210   |
| Q2LI64/1-35   | -----                                                         | ----- |
| Q60I25/1-218  | MALLLEGG---GHYRCDFKTTYKAK-KVDV--RLPDY-HFVDHRIEILKHD--KDYNKVKL | 209   |
| Q60I24/1-218  | MALLLEGG---GHYRCDFKTTYKAK-KVDV--RLPDY-HFVDHRIEILKHD--KDYNKVKL | 209   |
| A8CLT2/1-218  | MALLLEGG---GHYRCDFKTTYKAK-KVDV--RLPDY-HFVDHRIEILKHD--KDYNKVKL | 209   |
| B5BR3C/1-218  | MALLLEGG---GHYRCDFKTTYKAK-KVDV--RLPDY-HFVDHRIEILKHD--KDYNKVKL | 209   |
| B6CT26/1-219  | MALLLEGG---GHYRCDFKTTYKAK-KVDV--RLPDY-HFVDHRIEILKHD--KDYNKVKL | 209   |
| Q9U6Y3/43-260 | MALLLEGG---GHYRCDFKTTYKAK-KVDV--RLPDY-HFVDHRIEILKHD--KDYNKVKL | 209   |
| Q8T6U0/1-218  | MALLLEGG---GHYRCDFKTTYKAK-KVDV--RLPDY-HFVDHRIEILKHD--KDYNKVKL | 209   |
| Q8T5F0/7-229  | MALLLEGG---GHYRCDFKTTYKAK-KVDV--RLPDY-HFVDHRIEILKHD--KDYNKVKL | 209   |
| Q8T5F3/6-223  | MALLLEGG---GHYRCDFKTTYKAK-KVDV--RLPDY-HFVDHRIEILKHD--KDYNKVKL | 209   |
| Q66PW0/1-221  | MALLLEGG---GHYRCDFKTTYKAK-KVDV--RLPDY-HFVDHRIEILKHD--KDYNKVKL | 209   |
| Q8MU46/1-221  | MALLLEGG---GHYRCDFKTTYKAK-KVDV--RLPDY-HFVDHRIEILKHD--KDYNKVKL | 209   |
| Q8T5E9/1-221  | MALLLEGG---GHYRCDFKTTYKAK-KVDV--RLPDY-HFVDHRIEILKHD--KDYNKVKL | 209   |
| Q8T5E8/1-221  | MALLLEGG---GHYRCDFKTTYKAK-KVDV--RLPDY-HFVDHRIEILKHD--KDYNKVKL | 209   |
| Q8T6T8/1-221  | MALLLEGG---GHYRCDFKTTYKAK-KVDV--RLPDY-HFVDHRIEILKHD--KDYNKVKL | 209   |
| Q66PUS/1-220  | MALLLEGG---GHYRCDFKTTYKAK-KVDV--RLPDY-HFVDHRIEILKHD--KDYNKVKL | 209   |
| A8CL57/1-220  | MALLLEGG---GHYRCDFKTTYKAK-KVDV--RLPDY-HFVDHRIEILKHD--KDYNKVKL | 209   |
| Q8MAA2/34-254 | MALLLEGG---GHYRCDFKTTYKAK-KVDV--RLPDY-HFVDHRIEILKHD--KDYNKVKL | 209   |
| Q8MAA1/12-234 | MALLLEGG---GHYRCDFKTTYKAK-KVDV--RLPDY-HFVDHRIEILKHD--KDYNKVKL | 209   |
| Q66ND6/5-222  | MALLLEGG---GHYRCDFKTTYKAK-KVDV--RLPDY-HFVDHRIEILKHD--KDYNKVKL | 209   |
| Q9U6Y7/5-223  | MALLLEGG---GHYRCDFKTTYKAK-KVDV--RLPDY-HFVDHRIEILKHD--KDYNKVKL | 209   |
| Q553G7/6-223  | MALLLEGG---GHYRCDFKTTYKAK-KVDV--RLPDY-HFVDHRIEILKHD--KDYNKVKL | 209   |
| Q553G8/6-223  | MALLLEGG---GHYRCDFKTTYKAK-KVDV--RLPDY-HFVDHRIEILKHD--KDYNKVKL | 209   |
| Q2LI66/5-222  | MALLLEGG---GHYRCDFKTTYKAK-KVDV--RLPDY-HFVDHRIEILKHD--KDYNKVKL | 209   |
| Q66ND8/5-222  | MALLLEGG---GHYRCDFKTTYKAK-KVDV--RLPDY-HFVDHRIEILKHD--KDYNKVKL | 209   |
| Q66ND7/5-222  | MALLLEGG---GHYRCDFKTTYKAK-KVDV--RLPDY-HFVDHRIEILKHD--KDYNKVKL | 209   |
| Q9U6Y8/5-222  | MALLLEGG---GHYRCDFKTTYKAK-KVDV--RLPDY-HFVDHRIEILKHD--KDYNKVKL | 209   |
| Q6KF85/5-222  | MALLLEGG---GHYRCDFKTTYKAK-KVDV--RLPDY-HFVDHRIEILKHD--KDYNKVKL | 209   |
| Q2WG74/7-224  | MALLLEGG---GHYRCDFKTTYKAK-KVDV--RLPDY-HFVDHRIEILKHD--KDYNKVKL | 209   |
| Q9GTJ7/5-223  | MALLLEGG---GHYRCDFKTTYKAK-KVDV--RLPDY-HFVDHRIEILKHD--KDYNKVKL | 209   |
| A8CLM7/1-218  | MALLLEGG---GHYRCDFKTTYKAK-KVDV--RLPDY-HFVDHRIEILKHD--KDYNKVKL | 209   |
| A8CLM1/1-218  | MALLLEGG---GHYRCDFKTTYKAK-KVDV--RLPDY-HFVDHRIEILKHD--KDYNKVKL | 209   |
| Q1JU63/2-219  | MALLLEGG---GHYRCDFKTTYKAK-KVDV--RLPDY-HFVDHRIEILKHD--KDYNKVKL | 209   |
| Q1JV71/2-219  | MALLLEGG---GHYRCDFKTTYKAK-KVDV--RLPDY-HFVDHRIEILKHD--KDYNKVKL | 209   |
| Q1JV72/2-219  | MALLLEGG---GHYRCDFKTTYKAK-KVDV--RLPDY-HFVDHRIEILKHD--KDYNKVKL | 209   |
| Q1JV70/2-219  | MALLLEGG---GHYRCDFKTTYKAK-KVDV--RLPDY-HFVDHRIEILKHD--KDYNKVKL | 209   |
| B5T1L1/1-218  | MALLLEGG---GHYRCDFKTTYKAK-KVDV--RLPDY-HFVDHRIEILKHD--KDYNKVKL | 209   |
| A8CLV6/1-218  | MALLLEGG---GHYRCDFKTTYKAK-KVDV--RLPDY-HFVDHRIEILKHD--KDYNKVKL | 209   |
| Q66PV0/1-218  | MALLLEGG---GHYRCDFKTTYKAK-KVDV--RLPDY-HFVDHRIEILKHD--KDYNKVKL | 209   |
| Q66PUS/1-218  | MALLLEGG---GHYRCDFKTTYKAK-KVDV--RLPDY-HFVDHRIEILKHD--KDYNKVKL | 209   |
| Q95P04/1-218  | MALLLEGG---GHYRCDFKTTYKAK-KVDV--RLPDY-HFVDHRIEILKHD--KDYNKVKL | 209   |
| A8CLL3/1-218  | MALLLEGG---GHYRCDFKTTYKAK-KVDV--RLPDY-HFVDHRIEILKHD--KDYNKVKL | 209   |
| Q66PV1/1-218  | MALLLEGG---GHYRCDFKTTYKAK-KVDV--RLPDY-HFVDHRIEILKHD--KDYNKVKL | 209   |
| Q66PUS/1-218  | MALLLEGG---GHYRCDFKTTYKAK-KVDV--RLPDY-HFVDHRIEILKHD--KDYNKVKL | 209   |
| P83690/1-218  | MALLLEGG---GHYRCDFKTTYKAK-KVDV--RLPDY-HFVDHRIEILKHD--KDYNKVKL | 209   |
| A8CLN8/6-226  | MALLLEGG---GHYRCDFKTTYKAK-KVDV--RLPDY-HFVDHRIEILKHD--KDYNKVKL | 209   |
| B6CT27/1-220  | MALLLEGG---GHYRCDFKTTYKAK-KVDV--RLPDY-HFVDHRIEILKHD--KDYNKVKL | 209   |
| Q9U6Y5/5-228  | MALLLEGG---GHYRCDFKTTYKAK-KVDV--RLPDY-HFVDHRIEILKHD--KDYNKVKL | 209   |
| Q9U6Y4/5-228  | MALLLEGG---GHYRCDFKTTYKAK-KVDV--RLPDY-HFVDHRIEILKHD--KDYNKVKL | 209   |
| Q8T4U4/5-228  | MALLLEGG---GHYRCDFKTTYKAK-KVDV--RLPDY-HFVDHRIEILKHD--KDYNKVKL | 209   |
| B2ZAG2/5-226  | MALLLEGG---GHYRCDFKTTYKAK-KVDV--RLPDY-HFVDHRIEILKHD--KDYNKVKL | 209   |
| Q692V6/5-228  | MALLLEGG---GHYRCDFKTTYKAK-KVDV--RLPDY-HFVDHRIEILKHD--KDYNKVKL | 209   |
| B5LIN1/1-161  | MALLLEGG---GHYRCDFKTTYKAK-KVDV--RLPDY-HFVDHRIEILKHD--KDYNKVKL | 152   |

B5T1L5/5-228 MYLLLKDG---GRYRCQFDITYKAKSDPK--EMPEW-HFIQHKLTREDRS-DAKNQKWQL 215  
Q66PV2/5-228 MYLLLKDG---GRYRCQFDITYKAKSDPK--EMPEW-HFIQHKLTREDRS-DAKNQKWQL 215  
Q86LC2/5-228 SYLLLKDG---GRYHCQIDSVYKAKSEPK--KMPDR-HFIQHKLTREDRS-DATNQKWQL 215  
B2ZAG1/5-228 MYLLLKDG---GRYRCQFDSVYKAKSKPK--VMPDW-HFIQHKLTREDRS-DAKNQKWQL 215  
A8CLN4/5-231 MFLLLKDG---GRYRCQFDITYKAKSDPKTMMPPDW-HFIQHKLNREDRS-DAKHQKWRL 218  
A8CLV1/5-230 MFLLLKDG---GRYRCQFDITYKAKSDPKTMMPPDW-HFIQHKLNREDRS-DAKHQKWRL 217  
A8CLU7/1-223 EFLLLKDG---KRYKCFHTFHDAKEKSRNMPMPDF-HFVQHEIERKDLG-GPM-QTWQL 214  
A8CLP2/5-228 GFLLLKDG---KRYKCFHTFHDAKDKSKMPPMPDF-HFVQHKIERKDLG-GSM-QTWRL 215  
B6CTZ2/5-226 EFLLLKDG---GRYKCFHTVYRAKTEPK--RMPEF-HFVQHKLTRDVS-DPLKQWQL 213  
Q2VTM9/5-219 MFLMLEGG---HRLKCFQFTTSYK-AKAV--KMPPN-HIEHRLVRKEVADA-----VQI 206  
Q1ALD3/5-219 MFLMLEGG---HRHKCFQFTTSYK-AHKAV--KIPPN-HIEHRLVRKEVGDA-----VQI 206  
Q1ALD5/5-219 MFLMLEGG---HRQKCFQFTTSYK-ASKAV--KMPPN-HIEHVVMKGEDSDG-----FQI 206  
Q1ALD4/5-219 MFLVLEGG---HRLKCLFQTTYK-ADKVV--KMPPN-HIEHRLVRSEGDGA-----VQI 206  
Q09HR5/5-219 MFLMLEGG---YQKCFQFTTYR-TDKTV--KMPPN-HIEHRLVRSEGDGA-----VQI 206  
Q2VTM8/5-219 MFLKLEGG---QHRQCFQTTYK-AHKAV--KMPPN-HIEHRLVRSEGDGA-----VQL 206  
A8CLU1/1-218 MFLSLTDG---GNHRCQFSTLYK-AKAV--KLPTESHVVEHRLVRTDLPNGK-----VQL 209  
Q9U6Y6/5-224 AFLMLQGG---GNYRCQFHTSYK-TKPV--TMPPN-HVVEHRIARTDLGK--GNSVQL 211  
A8CLT7/5-222 MFLMLEGG---KNYKCFHTSYK-TKPV--TLPSN-HVVEHRIVRTLDKA--GNHVQL 209  
Q66ND1/5-220 MFLKLEGG---GYHSCQFHSTYK-TKEPV--TLPPN-HVVEHRIVRTDIED-----KKVLL 207  
Q66PV5/5-226 EFLMLEGG---GYHSCQFHSTYK-PEKPV--TLPPN-HVVEHRIVRTDLGQTAKGFTVKL 213  
B5T1L2/5-226 EFLMLEGG---GYHSCQFHSTYK-PEKPV--TLPPN-HVVEHRIVRTDLGQRAKGFVKL 213  
Q66PV3/5-226 EFLMLEGG---GYHSCQFHSTYK-PEKPA--ALPPN-HVVEHRIVRTDLGQSAKGFVKL 213  
B5T1L0/5-226 EFLMLEGG---GYHSCQFHSTYK-PEKPA--ALPPN-HVVEHRIVRTDLGQSAKGFVKL 213  
Q66PV4/5-226 GFLMLEGG---GYHSCQFHSTYK-PEKPA--ALPPN-HVVEHRIVRTDLGQSAKGFVKL 213  
B5LIN0/5-226 EFLMLEGG---GYHSCQFHSTYK-PEKPG--TLPPN-HVVEHRIVRTDLGQSAKGFVKL 213  
B5T1L3/5-226 MFLMLEGG---GYHRCQFHSTYK-PEKPG--TLPPN-HVVEHRIVRTDLGQSAKGFVKL 213  
B5T1L4/5-226 MFLMLEGG---GSHRCQFHSTYK-TEKPV--TLPPN-HVVEHQIVRTDLGQSAKGFVKL 213  
Q66PV7/5-226 MFLMLEGG---GSHRCQFHSTYK-TEKPV--TLPPN-HVVEHQIVRTDLGQSAKGFVKL 213  
A8CLY3/5-226 MFLMLEGG---GSHRCQFHSTYK-TEKPV--TLPPN-HVVEHQIVRTDLGQTAKGFTVKL 213  
Q66PV8/5-226 MFLMLEGG---GSHRCQFHSTYK-TEKPV--TLPPN-HVVEHQIVRTDLGQSAKGFVKL 213  
Q66PV9/5-226 MFLMLEGG---GYHRCQFHSTYK-TEKPV--ELPPN-HVVEHQIVRTDLGQSAKGFVKL 213  
A8CLX9/5-226 MFLMLEGG---GYHRCQFHSTYK-TEKPV--ELPPN-HVVEHQIVRTDLGQSAKGFVKL 213  
B6CTZ3/5-226 MFLMLEGG---GYHRCQFHSTYK-TEKPV--TLPPN-HVVEHQIVRTDLGQSAKGFVKL 213  
Q6I7B1/6-227 QFLLLEGG---GYQRCFHSTYK-TEKPV--AMPPS-HVVEHQIVRTDLGQTAKGFKVKL 213  
Q66PV6/5-226 EFLMLEGG---GYHSCQFHSTYK-PEKPV--ELPPN-HVVEHRIVRTDLGQTAKGFVKL 213  
Q86LV8/1-213 MFLKLEGG---GRHKCYFVTNHK-AKRAV--KVPDN-HFVWHRLVRN-----GDGNTVEL 204  
Q86LV7/1-213 MFLKLEGG---GRHKCYFVTNHK-AKRAV--KVPDN-HFVWHRLVRN-----GDGNTVEL 204  
A8CLR1/5-220 MFLKLEGG---GHRRCDFRTTYK-AKADV--KMPNS-HFITHCLVRK-----GDGNITEL 208  
Q6R8F5/5-223 MYLKLKDG---GNYRCYRTIYK-AKADV--KMPKS-HFVEHTLVRNNIKKDAKGNITEL 211  
Q6R8F4/1-219 MYLKLKDG---GNYRCDYRTIYK-AKADV--KMPKS-HFVEHTLVRNNIKKDAKGNITEL 211  
Q6R8F3/5-220 MFLKLEGG---GNYRCDFETTYK-AKAV--KMLDS-HFIEHRLVTT-----IRGNVVEL 207  
Q6I7B2/2-218 MYLKLKDG---GNHKCFKTTYKAAKIL--KMPGS-HYISHRLVRK-----TEGNITEL 209  
A7VMR3/2-218 MYLKLKDG---GNHKCFKTTYKAAKIL--EMPGD-HYIGHRLVRK-----TEGNITEL 209  
Q6I7B4/1-210 MFLKLEGG---GNHKCFKTTYKAAKVL--KMPQS-HFIGHRLVRK-----TKGNITEL 202  
Q6I7B3/1-217 MFLKLAGG---GNHKCFKTTYKAAKIL--KMPQS-HFIGHRLVRK-----TEGNITEL 209  
A8CLQ6/5-221 MFLKLVGG---GNHKCFKTTYKAAKVL--DMPQS-HFIFHRLVRK-----TEGNITEL 209  
A8CLM9/4-223 SFLVLQGG---GNYRCDYDTSYR-AMKPV--EMPGG-HFIQHRIVRRDIKDKSNGNTWQI 211  
Q95W86/2-220 MALKVSG--R-PPLICHLHSTYRSKKAC-ALTMPGF-HFADLRIQMPK-K--KKDEYFEL 210  
Q95W11/2-220 MALKVSG--R-PPLICHLHSTYRSKKAC-ALTMPGF-HFADLRIQMPK-K--KKDEYFEL 210  
Q8MU45/2-220 MALKVSG--R-PPLICHLHSTYRSKKAC-ALTMPGF-HFADLRIQMPK-K--KKDEYFEL 210  
Q95W85/2-220 MALKVGD--R-R-LICHLHSTYRSKKAVRALTMPGF-HFTDIRLQMPK-K--KKDEYFEL 210  
ASVTR7/2-222 MALKCPG--G-RHLTCHLHSTYRSKKPASALKMPGF-HFDHRIEIMEEV--EKGKCYKQ 212  
Q9GZ28/2-222 MALKCPG--G-RHLTCHLHSTYRSKKPASALKMPGF-HFDHRIEIMEEV--EKGKCYKQ 212  
ASVTR8/2-222 MALKCPG--G-RHLTCHLHSTYRSKKPASALKMPGF-HFDHRIEIMEEV--EKGKCYKQ 212  
Q9GP15/2-222 MALKCPG--G-RHLTCHLHSTYRSKKPASALKMPGF-HFDHRIEIMEEV--EKGKCYKQ 212  
Q2VFP3/2-221 MALKCTD--G-NHLTSHLRTTYRSRKPNSAVNMPGF-HFDHRIEILK-A--EQGFYEQ 211  
A0AQQ7/2-222 MALKCAD--G-NHLTCHLRTTYRSKKAALQMPGF-HFSDHRIEIVKVS--ENGLFEQ 212  
A0AQQ8/2-222 MALKCAD--G-NHLTCHLRTTYRSKKAALQMPGF-HFSDHRIEIVKVS--ENGLFEQ 212  
Q8ISF8/2-222 MALNVGD--G-GYLSCSFETTYRSKKTVENFKMPGF-HFVDHRLERLEES--DKEMFVQ 212  
Q86LV4/2-220 PALKLRNN-K-GHLLCVMETTYKPNK---KVNLPK-HFHHLRMEKDSIS--DDEKTIQ 210  
Q5QIU5/2-220 PALKLRNN-K-GHLLCVMETTYKPNK---KVNLPK-HFHHLRMEKDSIS--DDEKTIQ 210  
Q8T6T9/2-220 PALKLLGN-K-GHLLCVMETTYKSKK---KVNLPK-HFHHLRMEKDSIS--DDEKTIQ 210  
Q8T5E7/2-220 PALRLRD--K-GHLICHMETTYKPNK---EVLPEL-HFHHLRMEKLSVS--DDGKTIQ 210  
ASVTR6/2-219 PALMLAD--G-GHLSCFMETTYKSKK---EVLPEL-HFHHLRMEKLNIS--DDWKVTEQ 209  
Q9GPI6/2-219 PALMLAD--G-GHLSCFMETTYKSKK---EVLPEL-HFHHLRMEKLNIS--DDWKVTEQ 209  
Q5ZQ06/2-221 IALKLDDHG--GLTGNFKATYKSNP--NINLPKH-HFVENRVELEGR--DGGNYVKL 211  
B9UPG6/1-219 KAYLLKDG---SYYYGKMTTFYRSKKSQ--ALPGF-HFIQHRIVKTKVE--PGFKMVEQ 210  
Q5ZQ05/1-219 KAYLLKDG---SYYYGKMTTFYRSKKSQ--ALPGF-HFIQHRIVKTKVE--PGFKMVEQ 210  
Q7Z168/1-218 KAYLLKDG---SYYYGKMTTFYRSKKSQ--APPGY-HFVKHRLVKTNG--HGFKTVEQ 209  
Q9BL20/8-225 LVYKLESG---NYSCHMKTTFYRSKGVK--EFPEY-HFIIHRLKTYVE--EGS-FVEQ 209  
Q9BLY9/8-225 LVYKLESG---KYYSCHMKTLMKSGVVK--EFPSY-HFIQHRLEKTYVE--DGG-FVEQ 209  
Q963I9/5-223 IAFKLQGT---KHFTYHMRVYKSKPV--TMPLY-HFIQHRIVKTNVD--TASGVVQ 210  
A8CLX6/5-222 MYLMVEGG---KTLKCRYENYRANKPVL--MPPS-HFVDLRLTRTND--KEGLAFKL 209  
A7S3R2/57-279 MLLKVNDG---SFLRVQFETVYRMPKVPAGFKMPPHFMAYRLTRVND--EHCDTVIQ 214  
A7RGQ5/1-174 MLLKVNDG---SFLRVKFTVYRYVYV-----LYQK-----174  
A7S1H5/1-224 MLLKVNDG---SFLRVKFTVYRMPKVPAGFKMPPHFMAYRLTRVND--ADCNVLL 215  
A7S1H3/1-82 -----  
B1PNC2/5-218 WTYTTGSGK---RYQSTVRTNYTFAPMAANILQKQ-PMFVFRKTELKHS----KTELNF 204  
B1PNC0/4-217 WTYTTGSGK---RYQSTVRTNYTFAPMAANILKKNQ-PMFVFRKTELKHS----KTELNF 205  
B1PNC1/5-218 WTYNTASGK---RYQSTVRTNYTFNPKMAANILKKNQ-PMFVFRKTELKHS----KTELNF 204  
B1PNC4/5-218 WTYTTGSGK---RYQSTVRTNYTFAPMAANILKKNQ-PMFVFRKTELKHS----KTELNF 204  
C3YR99/48-261 WTYTTTEGK---RYQSTVRTNYTFAPMAANILQKQ-PMFVFRKTELKHS----KTELT 206  
B1PNC3/4-217 WTYTTGSGK---RYQSNVRSNFTFAKPIAANILQKQ-PMFVFRKTELKHS----KTELNF 206

B1PNB8/5-217 WYTTTSGK---RYQSNVRSNFTFAKPIAANILQKQ-PMFVFRKTELKHS----KTELN 205  
B1PNB9/4-216 WYTTTSGK---RYHSNVRSNFTFAKPIAANILQKQ-PMFVFRKTELKHS----KTELN 206  
C3YRA1/51-267 KTYTTTSGK---RYQCTFRENNTFAKPMADILQKQ-PMFIFHKTELQHSN---NAELTF 207  
C3YRA2/11-223 CSYTTTAGK---RYQSKMRENNTFAKPMADILQKQ-PMFVFRKSELQHS----KTELTF 205  
B1PND7/4-187 QTYTTTSGK---GYKSTVRTNNTFAKPIAADMM----- 184  
B1PND6/5-189 QTYTTASGK---GYKSTVRTNNTFAKPMADMMQNO----- 185  
B1PND8/4-184 QTYTTTSGK---GYQSTVRTNNTFAEPIAA----- 181  
B1PND5/5-186 QTYTTASGK---RYQGTVRTNNTFAKPIAANI----- 182  
C3YRA3/4-216 WTCPTTSGK---RYHATVRTNYTFAKPIAASILQKQ-PMFVFRKTEVKAS----DAEINL 205  
B1PND3/4-217 WYTTTSGK---RYQSDVQTNVTFKPIASADILKKQ-PMFVFRKVELKHS----KTELN 206  
B1PND2/5-217 WYTTTSGK---RYQSDVQTNVTFKPIASADILKKQ-PMFVFRKVELKHS----KTELN 205  
B1PNC9/4-217 WYTTTSGK---RYQSDVQTNVTFKPIAADILKKQ-PMFVFRKVELKHS----KTELN 206  
B1PNC6/5-217 WYTTTSGK---RYQSDVQTNVTFKPMADILKKQ-PMFVFRKVELKHT----KTELN 205  
B1PNC7/4-220 WYTTTSGK---RYQSDVQTNVTFKPIAADILKKQ-PMFVFRKVELKHT----KTELN 206  
B1PND0/5-220 WYTTTSGK---RYQSDVQTNVTFKPIAADILKKQ-PMFVFRKVELKHT----KTELN 205  
B1PNC5/5-220 WYTTTSGK---RYQSDVQTNVTFKPIAADILKKQ-PMFVFRMELKHT----KTELN 205  
B1PND1/5-217 WYTTTSGK---RYQSDVQTNVTFKPIASADILKKQ-PMFVFRKVELKHS----KTELN 205  
B1PND4/5-217 WYTTTSGK---RYQSDVQTNVTFKPIASADILKKQ-PMFVFRKVELKHS----KTELN 205  
B1PNC8/4-69 -----  
C3YRA0/8-104 -----  
C3YKQ3/5-218 WSYNLQNGK---RYRARSVSHYIFDKPFSADLKKQ-PVFVYRKHVVKAS----KTEVTL 204  
C3YK9/5-217 WSYNLQNGK---RYRARTVSNYIFGKPLAADVMKKQ-PVFVYRKYVKST---QTEITL 204  
C3YKQ2/53-191 WSFCTTDGK---RHQADVQTNVTFKPLPAGLKEKM-PIFLGHQIEVKAS----KTEITL 131  
A8QK29/4-215 WSFCTTDGK---RHQADVQTNVTFKPLPAGLKEKM-PIFLGHQIEVKAS----KTEITL 204  
C3YK9/5-215 WSFCTTDGK---RHQADVQTNVTFKPLPAGLKEKM-PIFLGHQIEVKAS----KTEITL 203  
C3YKQ1/4-215 WSFCTTDGK---RHQADVQTNVTFKPLPAGLKEKM-PIFLGHQIEVQAS----KTEINL 204  
C3ZLQ0/369-585 WYRTSSGG---RYRATVQTNVTFKPIAAGLKNM-PMFVFRQLEVTGS----KTEISL 208  
C3YK10/4-218 WSYRTSSGG---RYRATVQTNVTFKPIAAGLKNM-PMFVFRQLEVTGS----KTEISL 207  
C3YKQ0/5-214 WFTFTEKGGK---KRYKAEVMTNATFAQNLQPLKNVM-PLFVFRKVDIDCS----KTEVTL 205  
Q6WV10/1-215 RTYLLKDDG---YSAQVNNHMHFKSAIHTTMLQNGGSMFTYRVEEHT---QNEVAI 208  
Q6WV09/1-217 RTYLLKDDG---YSAQVNNHMHFKSAIHPTMLQNGGSMFTHRVEENHT---KTNVAI 208  
Q6WV11/1-215 RTWMLRDGG---YSAQVNNHMHFKTAMHPTMLQNGGSMFTYRVEELHS---QSDVGI 208  
Q6WV12/1-213 RTFSLRDGG---YYSFVVDSHMHFKSAIHPSILQNGGPMFAFRRVEELHS---NTELGI 208  
Q6WV13/1-214 RTFSLRDGG---YYSFVVDSHMHFKSAIHPSILQNGGPMFAFRRVEELHS---NTELGI 208  
Q6WV08/1-214 RTLSLRDGG---YYSQVTSIHIFKNAIHPSILHNGGSMFTYRVEELHT---QTDLGI 208  
Q2MHN7/1-215 RAFQLKDG---FYTAEVKNIDFKNPIHESFSKSG-PMFTHRVEEHT---KENLAM 205

Q17106/5-229 LEFVTSAGI--- 225  
Q17105/5-229 LEFVTAARI--- 225  
P42212/5-229 LEFVTAAGI--- 225  
Q6YGZ0/5-229 FEFVTAAGI--- 225  
Q8WTC5/5-229 LEFFSACGH--- 225  
Q8WTC4/5-229 LEFFSACGH--- 225  
Q8WTC9/5-229 LEFFSACGH--- 225  
Q8WTD0/5-229 LEFFSACGH--- 225  
Q8WTC8/5-229 LEFFSACGH--- 225  
Q8WTC6/5-229 LEFFSACGH--- 225  
Q8WP95/5-229 LEFFSACGH--- 225  
Q8WTC7/5-229 LEFFSACGH--- 225  
Q6RYS7/5-229 VETVRAVDC--- 225  
Q6RYS6/39-258 KETNCAFDF--- 220  
Q6RYS5/2-222 KEVNVASGI--- 221  
Q6RYS4/5-225 REVTYAHSV--- 221  
Q2TCH5/5-225 REVAYAHSV--- 221  
Q53UG7/1-221 YEHAKAHSG--- 221  
Q53UG8/1-221 YEHAKAHSG--- 221  
Q8MU48/1-218 SEHAEAHSG--- 218  
A8CLW1/1-218 CEHAEAHSG--- 218  
B6CTZ4/1-218 CEHAEAHSG--- 218  
Q5TLG6/1-218 HEHAEAHSE--- 218  
A8CLQ1/1-223 HEHAEAHSG--- 223  
Q2LI65/1-219 REHAEAHFG--- 219  
A8CLW4/1-222 REHAEAHSG--- 222  
B6CTZ5/4-224 HEHAKARYG--- 221  
A3F207/1-221 FEDAVAHSG--- 221  
Q962P9/1-221 YEHAEAHSG--- 221  
Q7Z0N8/1-221 YEHAEAHSG--- 221  
Q66ND5/1-221 YEHAEAHFG--- 221  
Q66ND4/1-221 YEHAEAHFG--- 221  
Q66ND2/1-221 YEHAEAHSG--- 221  
A7UAL7/1-221 YEHAEAHSG--- 221  
Q7Z0N6/1-221 YEHAEAHSG--- 221  
A7UAL9/1-221 YEHAEAHSG--- 221  
Q8T5F2/8-228 HEHAEARHG--- 221  
Q7Z0N7/8-228 HEHAEARHG--- 221  
Q8MU47/8-228 YEHAEAHSG--- 221  
Q95VT0/1-221 YEHAEAAXG--- 221  
A7UAL3/1-221 HEHAEAHSG--- 221  
A7UAL6/1-218 YEHAEAHSG--- 218  
A7UAL8/1-218 YEHAEAHSG--- 218  
A8CL52/1-219 YEHAHAHLG--- 219  
Q8I6J8/1-219 YEHAHAHSG--- 219

|               |              |     |
|---------------|--------------|-----|
| A3F208/1-219  | YEHAVAHSG--- | 219 |
| A8CLR7/1-219  | YEHAVAHSG--- | 219 |
| Q5S6Z9/1-219  | YEHAVAHSG--- | 219 |
| Q66PW1/5-223  | YEHAVAHSG--- | 219 |
| Q8T5F1/1-219  | YEHAEAHSG--- | 219 |
| Q7Z0W9/1-219  | YEHAEAHSG--- | 219 |
| Q6USK3/1-219  | YEHAEAHSG--- | 219 |
| A7UAL4/1-219  | YEYEAHSG---  | 219 |
| A7UAM0/1-219  | CEHAEAHSG--- | 219 |
| Q7Z0W5/1-218  | YENAVARPS--- | 218 |
| Q95UA7/1-218  | YENAVARPS--- | 218 |
| A7UAL1/1-218  | YENAVARPS--- | 218 |
| A8CLP7/1-218  | YENAVARQQ--- | 218 |
| A7UAL2/1-218  | YEHAEAHSG--- | 218 |
| A7UAL5/1-218  | YEHAEAHSG--- | 218 |
| Q963F5/1-218  | SEDAEARYS--- | 218 |
| Q7Z0W4/1-218  | SENAEARYS--- | 218 |
| Q66ND3/1-218  | SENAEARYS--- | 218 |
| Q2LI64/1-35   | -----        |     |
| Q60I25/1-218  | YENAVARYS--- | 218 |
| Q60I24/1-218  | YENAVARYS--- | 218 |
| A8CLT2/1-218  | YENAVARYS--- | 218 |
| B5BRC3/1-218  | YENAVARYS--- | 218 |
| B6CTZ6/1-219  | YENAVARYS--- | 219 |
| Q9U6Y3/43-260 | YENAVARYS--- | 218 |
| Q8T6U0/1-218  | YEHGVARYS--- | 218 |
| Q8T5F0/7-229  | QEYAKARSLH-  | 223 |
| Q8T5F3/6-223  | REHAKARSS--- | 218 |
| Q66PW0/1-221  | FEDAVAHYS--- | 221 |
| Q8MU46/1-221  | FEDAVAHYS--- | 221 |
| Q8T5E9/1-221  | SEDAVAHNS--- | 221 |
| Q8T5E8/1-221  | YEGAVAHYS--- | 221 |
| Q8T6T8/1-221  | TEVAEARYS--- | 221 |
| Q66PU5/1-220  | YEAAVARHS--- | 220 |
| A8CL57/1-220  | YEAAVARHS--- | 220 |
| Q8MMA2/34-254 | HDVSWARYS--- | 221 |
| Q8MMA1/12-234 | REVALARYS--- | 223 |
| Q66ND6/5-222  | HEIIVARXH--- | 218 |
| Q9U6Y7/5-223  | HEIIVARHH--- | 219 |
| Q5S3G7/6-223  | YERAEGRHS--- | 218 |
| Q5S3G8/6-223  | YERAEGRHS--- | 218 |
| Q2LI66/5-222  | YERTEGRHH--- | 218 |
| Q66ND8/5-222  | YERTEGRHH--- | 218 |
| Q66ND7/5-222  | YERTEGRHH--- | 218 |
| Q9U6Y8/5-222  | YERTEGRHH--- | 218 |
| Q6KF85/5-222  | YERTEGRHH--- | 218 |
| Q2WG74/7-224  | YERTEGRHH--- | 218 |
| Q9GTJ7/5-223  | YEKTQGRHH--- | 219 |
| A8CLM7/1-218  | CEISTARHS--- | 218 |
| A8CLM1/1-218  | CEISTARHS--- | 218 |
| Q1JU63/2-219  | CETAIARHS--- | 218 |
| Q1JV71/2-219  | CETAIARHS--- | 218 |
| Q1JV72/2-219  | CETAIARHS--- | 218 |
| Q1JV70/2-219  | CETAIARHS--- | 218 |
| B5T1L1/1-218  | CEISTARKP--- | 218 |
| A8CLV6/1-218  | CEISTARKS--- | 218 |
| Q66PV0/1-218  | CEISTARKP--- | 218 |
| Q66PU8/1-218  | CEISTARKP--- | 218 |
| Q95P04/1-218  | CEISTARKP--- | 218 |
| A8CLL3/1-218  | CEISTARKP--- | 218 |
| Q66PV1/1-218  | CEISTARKP--- | 218 |
| Q66PU9/1-218  | REISTARKP--- | 218 |
| P83690/1-218  | CEISTARKP--- | 218 |
| A8CLN8/6-226  | FEQREIAHALS  | 221 |
| B6CTZ7/1-220  | QEAAEGHFS--- | 220 |
| Q9U6Y5/5-228  | TEHAIASGS--- | 224 |
| Q9U6Y4/5-228  | TEHAIAFPS--- | 224 |
| Q8T4U4/5-228  | IEHAIASRS--- | 224 |
| B2ZAG2/5-226  | VEHAVASRS--- | 222 |
| Q692V6/5-228  | VEHAVASRS--- | 224 |
| B5LIN1/1-161  | VEHAVASRS--- | 161 |
| B5T1L5/5-228  | VEHAVASRS--- | 224 |
| Q66PV2/5-228  | VEHAVASRS--- | 224 |
| Q86LC2/5-228  | KERAVASLS--- | 224 |
| B2ZAG1/5-228  | VEHASASRS--- | 224 |
| A8CLN4/5-231  | VENAIAYRS--- | 227 |
| A8CLV1/5-230  | VENAIAYRS--- | 226 |
| A8CLU7/1-223  | TEHAAACKN--- | 223 |
| A8CLP2/5-228  | TEHAAACKT--- | 224 |
| B6CTZ2/5-226  | TEDAAACES--- | 222 |
| Q2VTM9/5-219  | QEHAVAKHF--- | 215 |
| Q1ALD3/5-219  | QEHAVAKHF--- | 215 |
| Q1ALD5/5-219  | KEHAVAKHF--- | 215 |



|               |               |     |
|---------------|---------------|-----|
| Q1ALD4/5-219  | QEHAVAKYF---  | 215 |
| Q09HR5/5-219  | QEHAVAKYF---  | 215 |
| Q2VTM8/5-219  | KEHAVAKCF---  | 215 |
| A8CLU1/1-218  | EEHAAARLN---  | 218 |
| Q9U6Y6/5-224  | TEHAVAHIT---  | 220 |
| A8CLT7/5-222  | DEHAVAHVN---  | 218 |
| Q66ND1/5-220  | EETAVAHVN---  | 216 |
| Q66PV5/5-226  | EEHAAAHHV---  | 222 |
| B5T1L2/5-226  | EEHAAAHHV---  | 222 |
| Q66PV3/5-226  | EEHAAAHHV---  | 222 |
| B5T1L0/5-226  | EEHAAAHHV---  | 222 |
| Q66PV4/5-226  | EEHAAAHHV---  | 222 |
| B5LIN0/5-226  | EEHAAAHHV---  | 222 |
| B5T1L3/5-226  | EEHAAAHHV---  | 222 |
| B5T1L4/5-226  | EAHAAAHHV---  | 222 |
| Q66PV7/5-226  | EAHAAAHHV---  | 222 |
| A8CLY3/5-226  | EEHAAAHSV---  | 222 |
| Q66PV8/5-226  | EAHAAAHHV---  | 222 |
| Q66PV9/5-226  | EAHAAAHHV---  | 222 |
| A8CLX9/5-226  | EAHAAAHHV---  | 222 |
| B6CTZ3/5-226  | EALAAAHHV---  | 222 |
| Q6I7B1/6-227  | EEHAEHHV---   | 222 |
| Q66PV6/5-226  | VQHAAAHHV---  | 222 |
| Q86LV8/1-213  | EETAEARYD---  | 213 |
| Q86LV7/1-213  | EETAEARYD---  | 213 |
| A8CLR1/5-220  | IEDAEEARN---  | 216 |
| Q6R8F5/5-223  | IEDASARY---   | 219 |
| Q6R8F4/1-219  | IEDASARY---   | 219 |
| Q6R8F3/5-220  | QEDAEARNS---  | 216 |
| Q6I7B2/2-218  | VEDAVAHS---   | 217 |
| A7VMR3/2-218  | VEDAVAHS---   | 217 |
| Q6I7B4/1-210  | VEDAVAHC---   | 210 |
| Q6I7B3/1-217  | VEDAVAHC---   | 217 |
| A8CLQ6/5-221  | VEDVEAHN---   | 217 |
| A8CLW9/4-223  | QEDAFAHNS---  | 220 |
| Q95W86/2-220  | YEASVARYS---  | 219 |
| Q95W11/2-220  | YEASVARYS---  | 219 |
| Q8MU45/2-220  | YEASVARYS---  | 219 |
| Q95W85/2-220  | YEASVARYS---  | 219 |
| ASVTR7/2-222  | YEAAVGRYC---  | 221 |
| Q9GZ28/2-222  | YEAAVGRYC---  | 221 |
| ASVTR8/2-222  | YEAAVGRYC---  | 221 |
| Q9GP15/2-222  | YEAAVARYC---  | 221 |
| Q2VFP3/2-221  | YESAVARYC---  | 220 |
| A0AQQ7/2-222  | HESVARYC---   | 221 |
| A0AQQ8/2-222  | HESVARYC---   | 221 |
| Q8ISF8/2-222  | HEHAVAKFC---  | 221 |
| Q86LV4/2-220  | HEDVRASYF---  | 219 |
| Q5QIU5/2-220  | HEHVVASYF---  | 219 |
| Q8T6T9/2-220  | HENVRASYF---  | 219 |
| Q8T5E7/2-220  | HEYVVASYS---  | 219 |
| ASVTR6/2-219  | HESVVASYS---  | 218 |
| Q9GP16/2-219  | HESVVASYS---  | 218 |
| Q5ZQ06/2-221  | HERNKARYS---  | 220 |
| B9UPG6/1-219  | SEYATAFVS---  | 219 |
| Q5ZQ05/1-219  | AEYATAHVC---  | 219 |
| Q7Z168/1-218  | TEYATAHVS---  | 218 |
| Q9BLZ0/8-225  | HETAIAQLT---  | 218 |
| Q9BLY9/8-225  | HETAIAQMT---  | 218 |
| Q963I9/5-223  | HETAIAAHS---  | 219 |
| A8CLX6/5-222  | EYAVARVL---   | 218 |
| A7S3R2/57-279 | HEWSEAFSC---  | 223 |
| A7RGQ5/1-174  | -----         |     |
| A7S1H5/1-224  | HEWGKAFSC---  | 224 |
| A7S1H3/1-82   | -----         |     |
| B1PNC2/5-218  | KEWQKAFADV--- | 214 |
| B1PNC0/4-217  | KEWQKAFD---   | 214 |
| B1PNC1/5-218  | KEWQMAFADV--- | 214 |
| B1PNC4/5-218  | KEWQKAFADV--- | 214 |
| C3YR99/48-261 | KEWQKAFD---   | 214 |
| B1PNC3/4-217  | KEWQTAFS---   | 214 |
| B1PNB8/5-217  | KEWQTAFS---   | 213 |
| B1PNB9/4-216  | KEWQTAF---    | 213 |
| C3YRA1/51-267 | KEKQTAFSDM--- | 217 |
| C3YRA2/11-223 | KEWQKAFD---   | 213 |
| B1PND7/4-187  | -----         |     |
| B1PND6/5-189  | -----         |     |
| B1PND8/4-184  | -----         |     |
| B1PND5/5-186  | -----         |     |
| C3YRA3/4-216  | KEWQKAFH---   | 213 |
| B1PND3/4-217  | KQWQKAFQ---   | 214 |
| B1PND2/5-217  | KQWQKAFQ---   | 213 |
| B1PNC9/4-217  | KQWQKAFQ---   | 214 |

|                |              |     |
|----------------|--------------|-----|
| B1PNC6/5-217   | KQWQKAFQ---- | 213 |
| B1PNC7/4-220   | KQWQKAFQDIA- | 217 |
| B1PND0/5-220   | KQWQKAFQDIA- | 216 |
| B1PNC5/5-220   | KQWQKAFQDIA- | 216 |
| B1PND1/5-217   | KQWQKAFQ---- | 213 |
| B1PND4/5-217   | KQWQKAFQ---- | 213 |
| B1PNC8/4-69    | -----        |     |
| C3YRA0/8-104   | -----        |     |
| C3YKQ3/5-218   | DEREKAFYEL-- | 214 |
| C3YKP7/5-217   | DEREKAFYE--- | 213 |
| C3YKQ2/53-191  | SEKVKAFI---- | 139 |
| A8QVZ9/4-215   | SEKVKAFI---- | 212 |
| C3YKP9/5-215   | CEKVKAFI---- | 211 |
| C3YKQ1/4-215   | SEKVKAFI---- | 212 |
| C3ZLQ0/369-585 | QEQQKAFST--- | 217 |
| C3YKI0/4-218   | QEQQKAFS---- | 215 |
| C3YKQ0/5-214   | IEREK-----   | 210 |
| Q6WV10/1-215   | VEYQNVF----- | 215 |
| Q6WV09/1-217   | VEYQNVFKT--- | 217 |
| Q6WV11/1-215   | VEYQHVF----- | 215 |
| Q6WV12/1-213   | VEYQH-----   | 213 |
| Q6WV13/1-214   | VEYQHA-----  | 214 |
| Q6WV08/1-214   | VEYQHV-----  | 214 |
| Q2MHN7/1-215   | VEYQQVFNSA-- | 215 |
